# Supplementary material
Source: PubMed Central journal article supplement (PMC3309603)
Supplement: NIHMS345925-supplement-2_si_002.pdf [file NIHMS345925-supplement-2_si_002.pdf]

*C-Terminal Functionalization of Nylon-3 Polymers:  
Effects of C-Terminal Groups on Antibacterial and  
Hemolytic Activities*

**Supporting Information Part 2**

**MALDI-TOF, GPC, <sup>1</sup>H NMR, Bioassay and CAC data**

*Jihua Zhang,<sup>†</sup> Matthew J. Markiewicz,<sup>†</sup> Brendan P. Mowery,<sup>†</sup> Bernard Weisblum,<sup>‡</sup> Shannon S.  
Stahl<sup>†\*</sup> and Samuel H. Gellman<sup>†\*</sup>*

Department of Chemistry and Department of Pharmacology, University of Wisconsin-Madison,  
1101 University Avenue, Madison, Wisconsin 53706

**1 MALDI-TOF data samples generated during efforts to achieve C-terminal functionalization of poly(CO)**

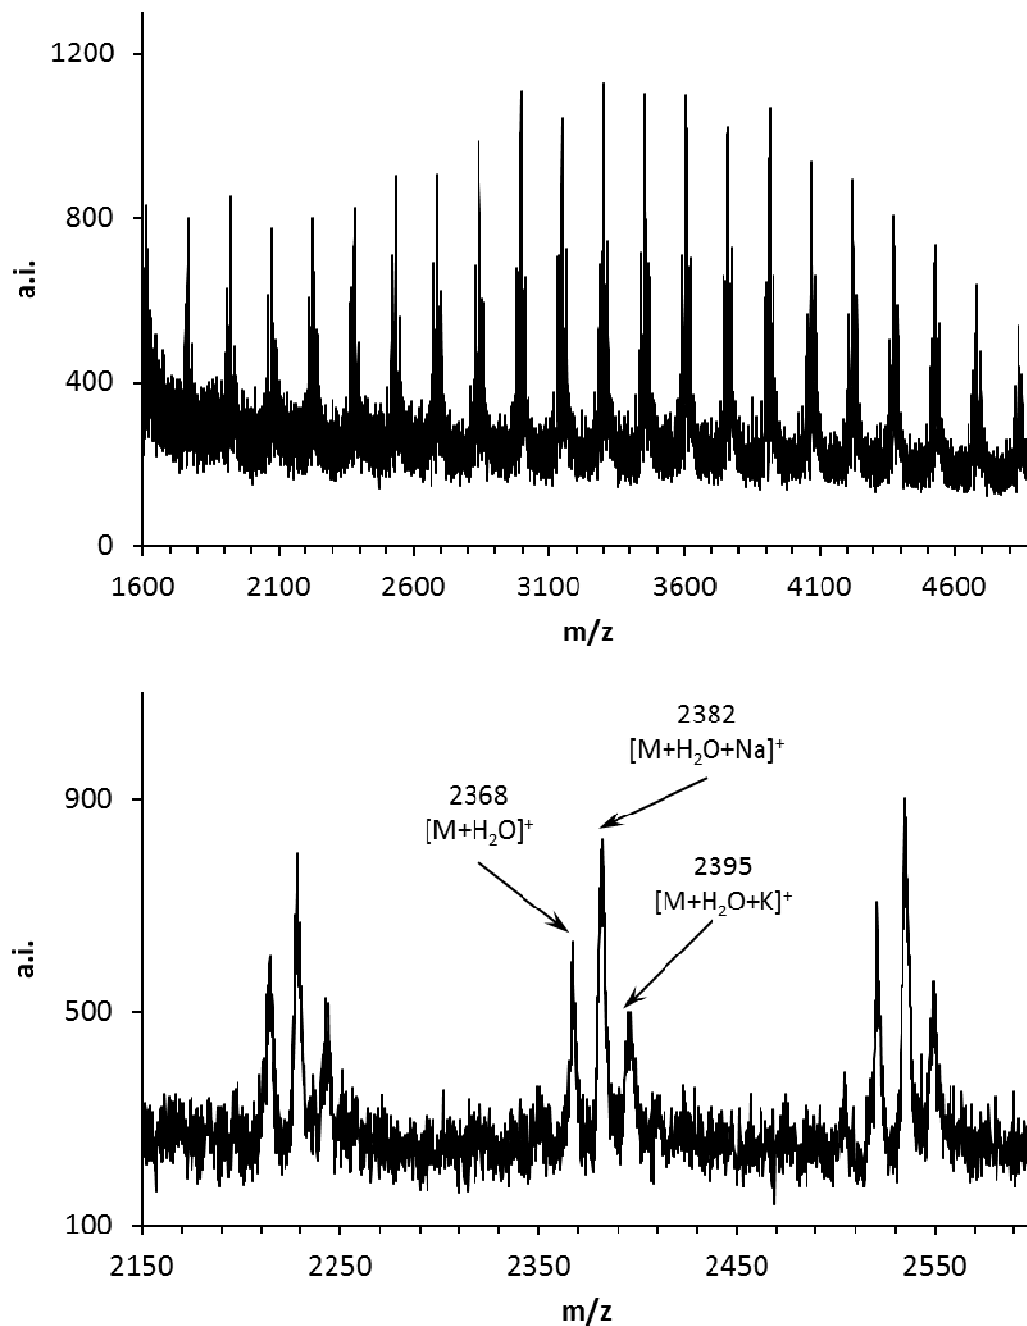

MALDI-TOF spectrum of the product from Table S1, entry 1. M refers to poly(CO) containing 15 units with an acetyl *N*-terminus and an imide *C*-terminus.

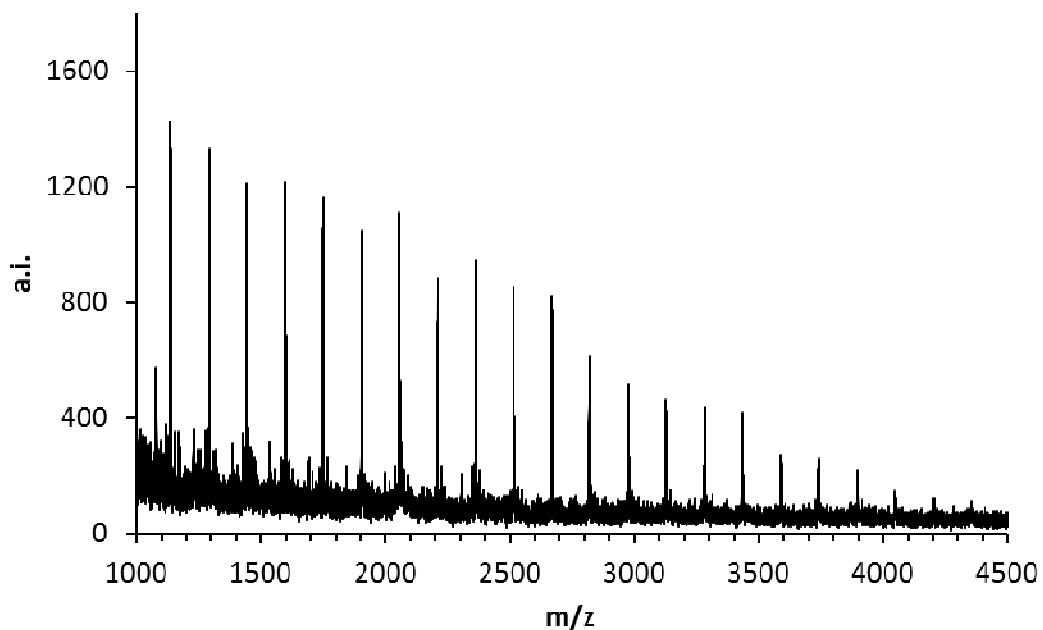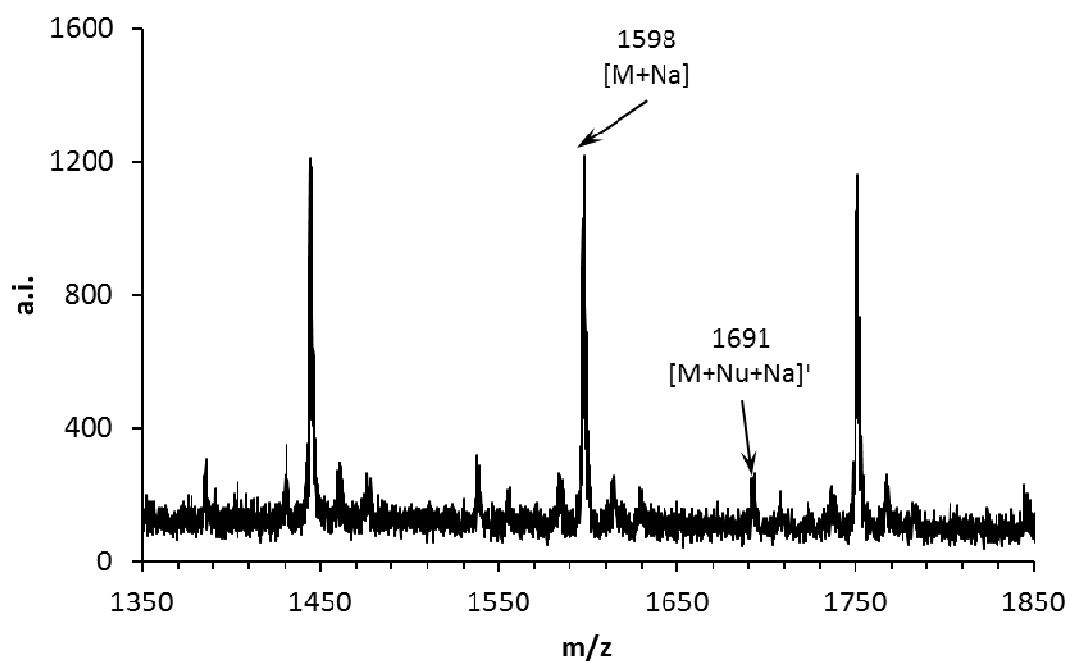

MALDI-TOF spectrum of the product from Table S1, entry 2. M refers to poly(CO) containing 10 subunits with an acetyl *N*-terminus and an imide *C*-terminus. Nu = benzylamine.

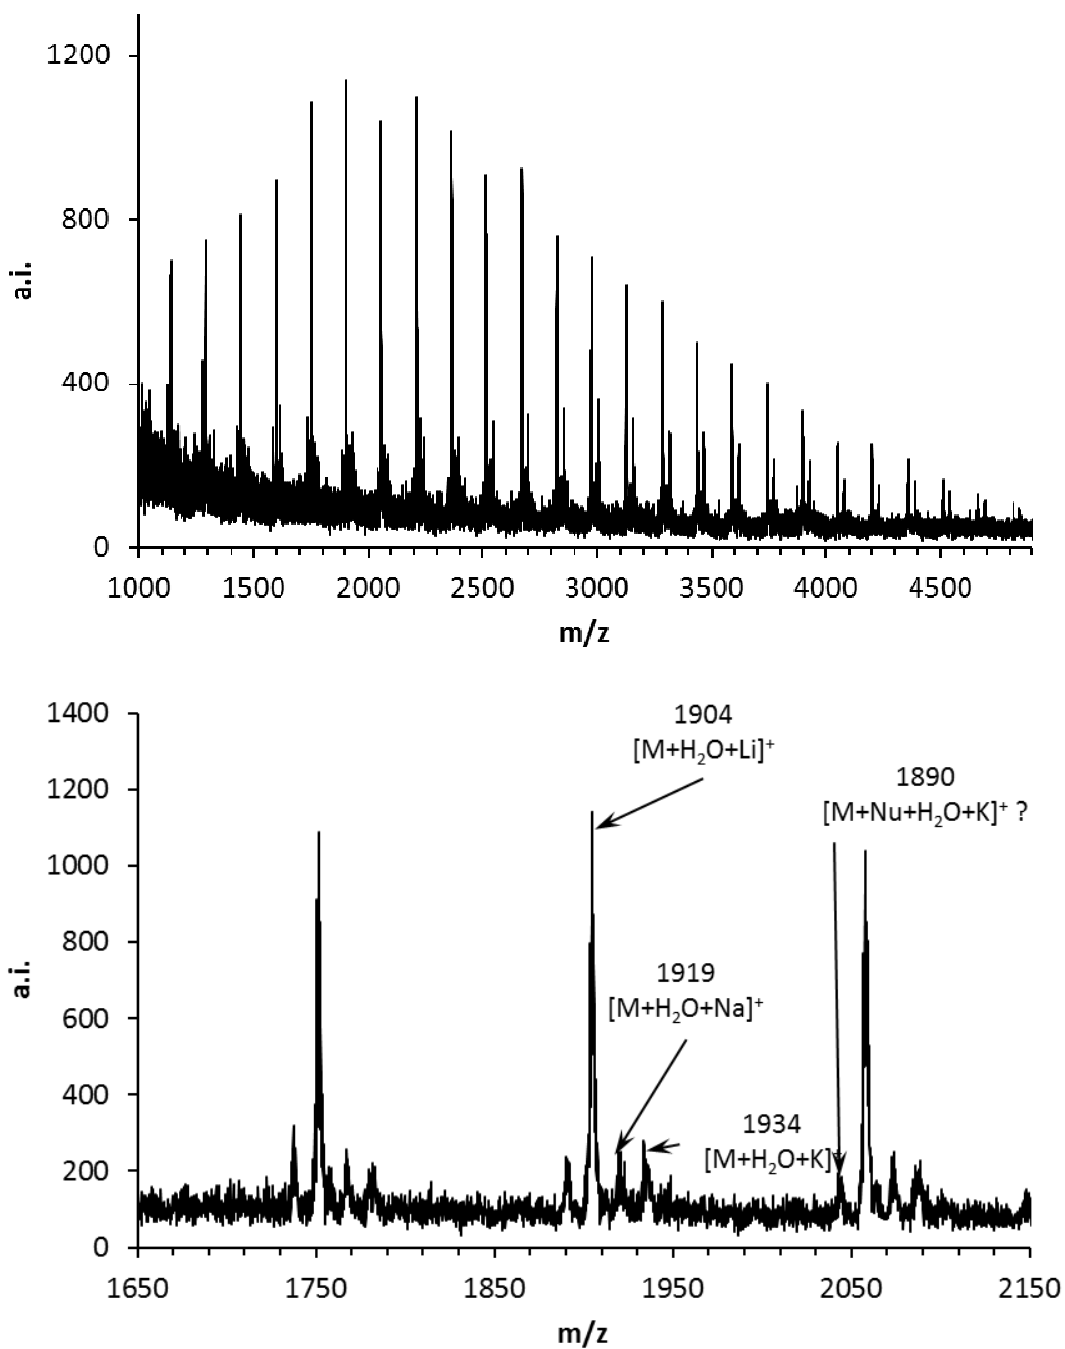

MALDI-TOF spectrum of the product from Table S1, entry 3. M refers to poly(CO) containing 12 subunits with an acetyl *N*-terminus and an imide *C*-terminus. Nu = benzylamine.

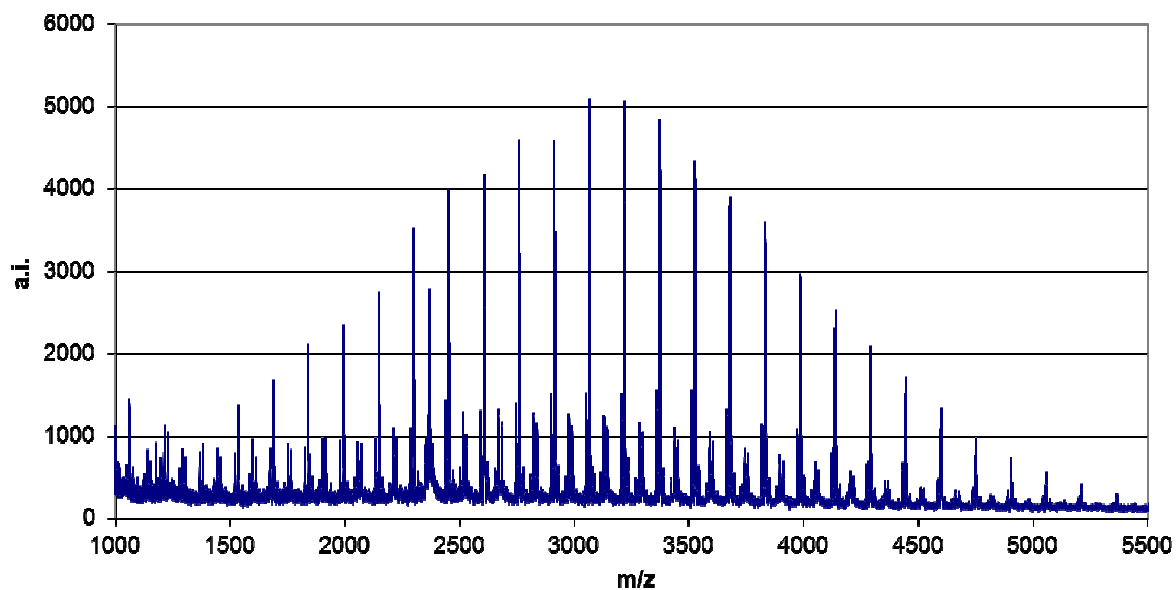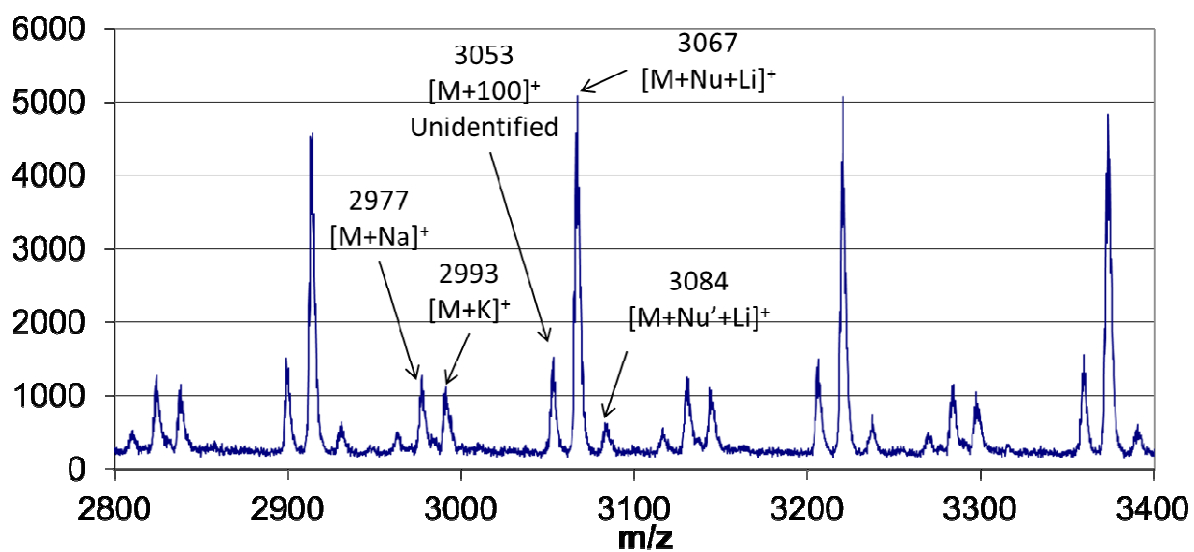

MALDI-TOF spectrum of the product from Table S1, entry 4. M refers to poly(CO) containing 19 subunits with an acetyl *N*-terminus and an imide *C*-terminus. Nu = benzylamine, Nu' = benzyl mercaptan.

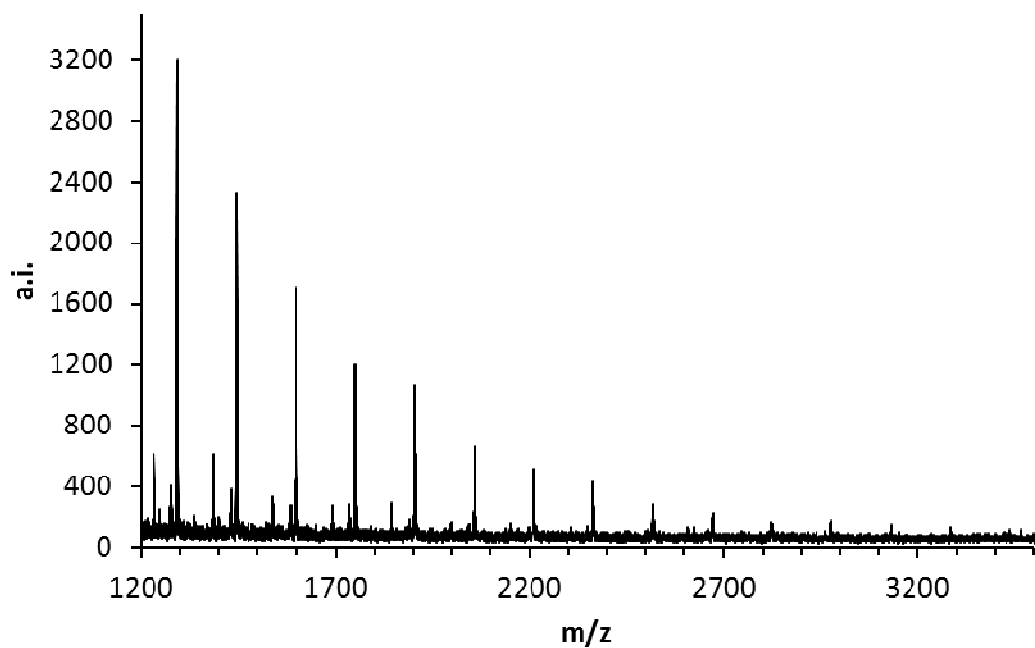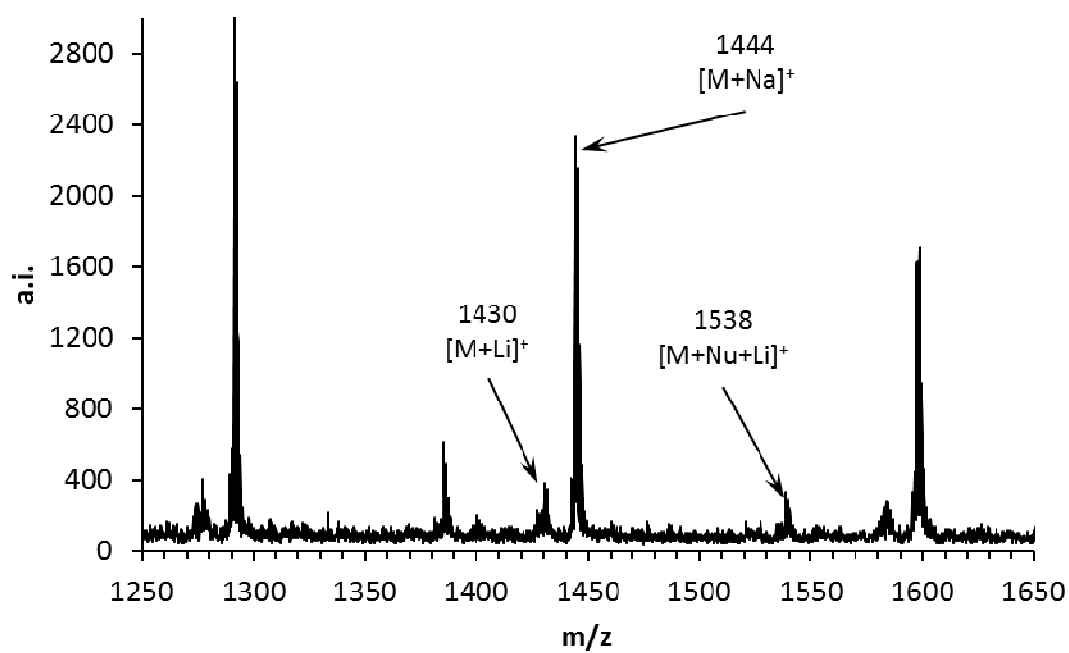

MALDI-TOF spectrum of the product from Table S1, entry 5. M refers to poly(CO) containing 9 subunits with an acetyl *N*-terminus and an imide *C*-terminus. Nu = benzylamine.

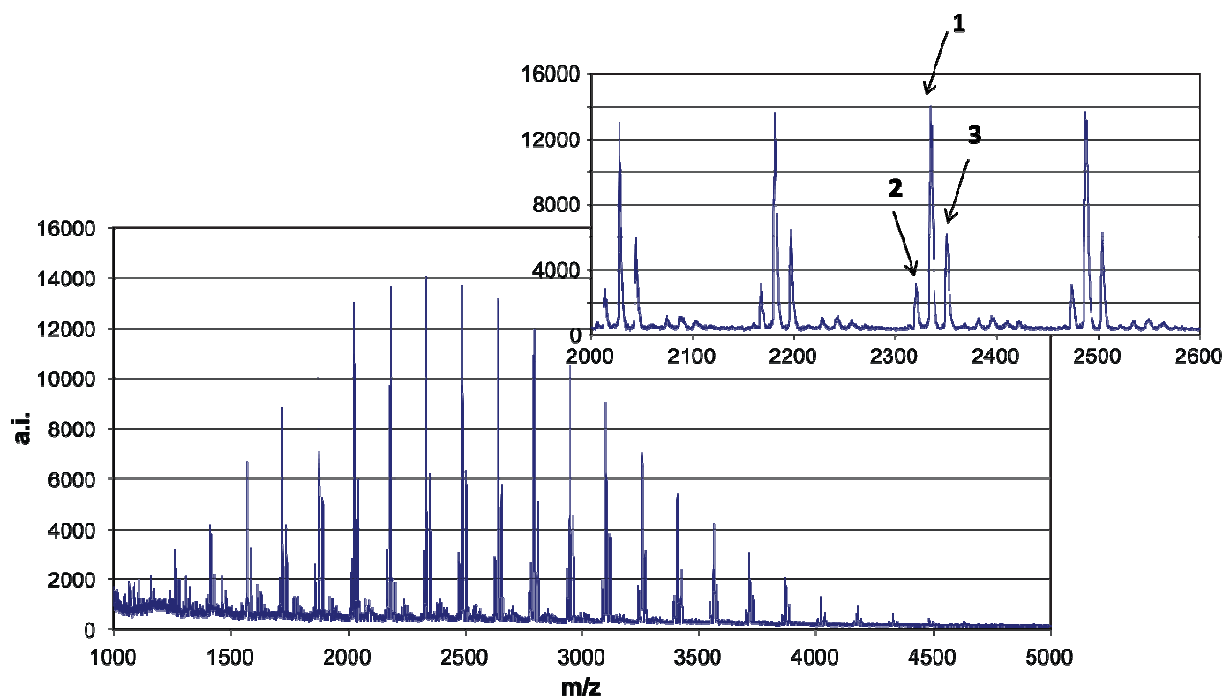

MALDI-TOF spectrum of the product from Table S1, entry 6. The labels 1, 2 and 3 indicate  $[M+\text{Nu}+\text{Li}]^+$  (2165),  $[M+\text{Nu}+\text{Na}]^+$  (2181) and  $[M+\text{Nu}+\text{K}]^+$  (2197) peaks, respectively, where M refers to poly(CO) containing 13 subunits with an acetyl *N*-terminus and an imide *C*-terminus. Nu = benzyl mercaptan.

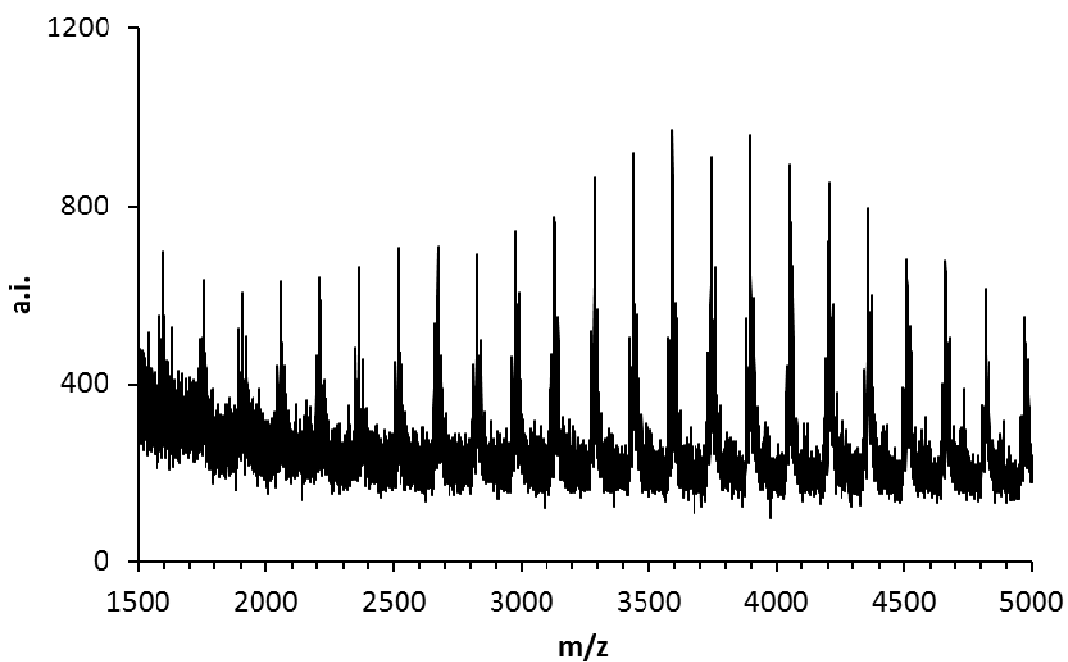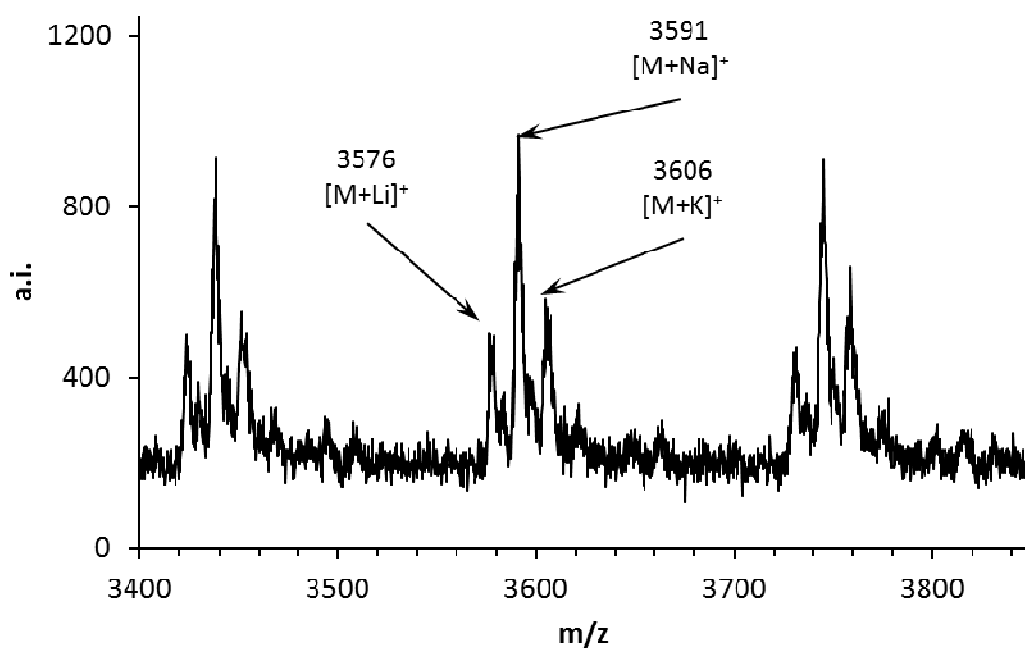

MALDI-TOF spectrum of the product from Table S1, entry 7. M refers to poly(CO) containing 23 subunits with an acetyl *N*-terminus and an imide *C*-terminus.



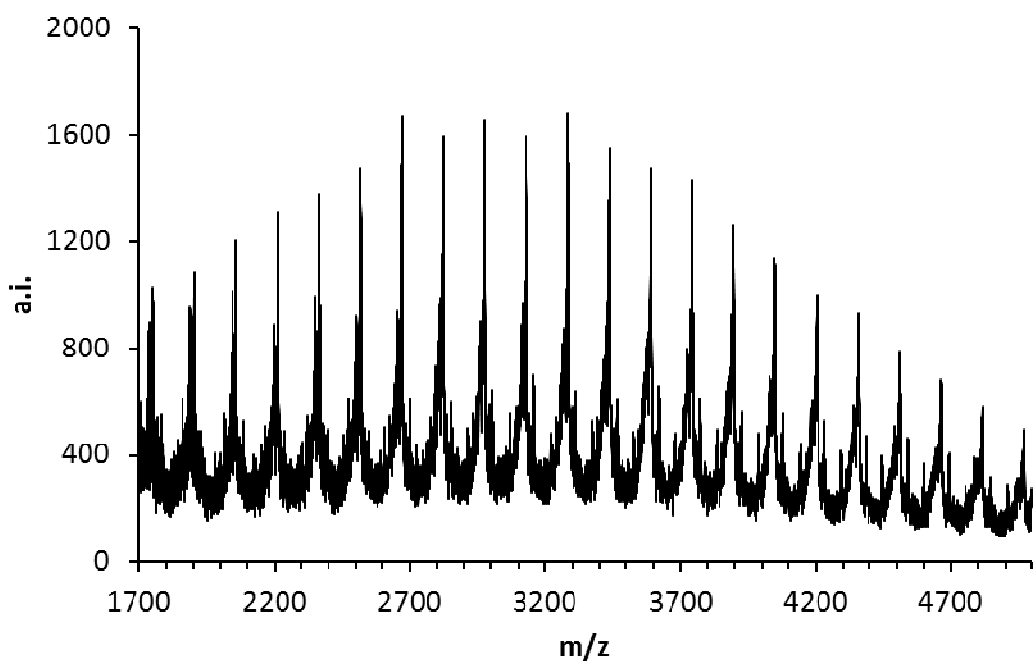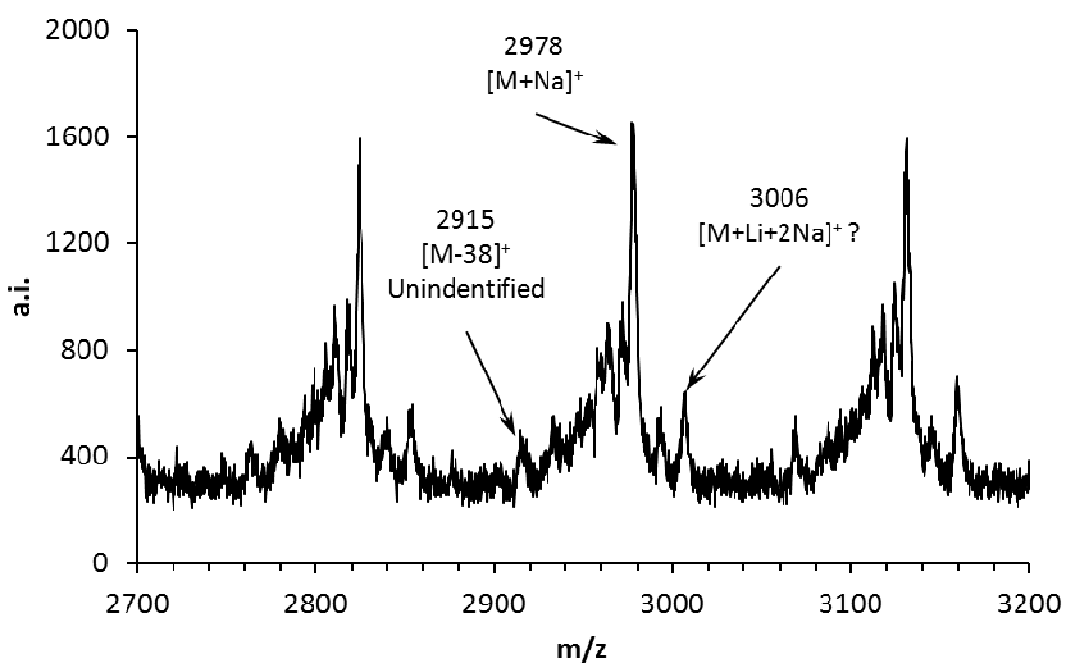

MALDI-TOF spectrum of the product from Table S1, entry 8. M refers to poly(CO) containing 19 subunits with an acetyl *N*-terminus and an imide *C*-terminus.

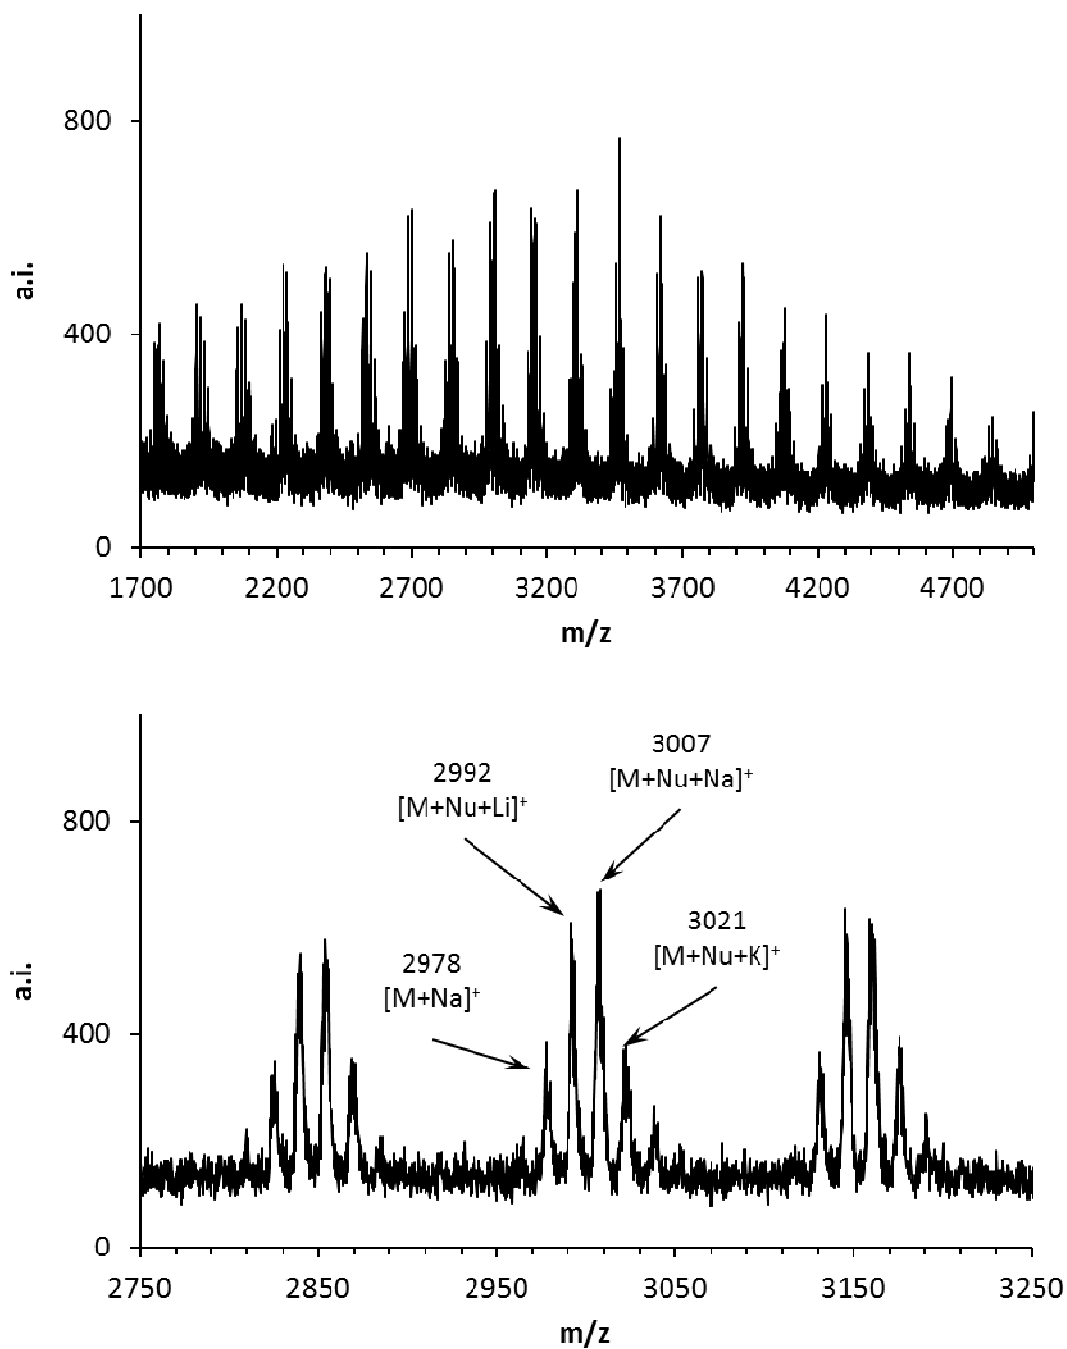

MALDI-TOF spectrum of the product from Table S1, entry 10. M refers to poly(CO) containing 19 subunits with an acetyl *N*-terminus and an imide *C*-terminus. Nu = MeOH.

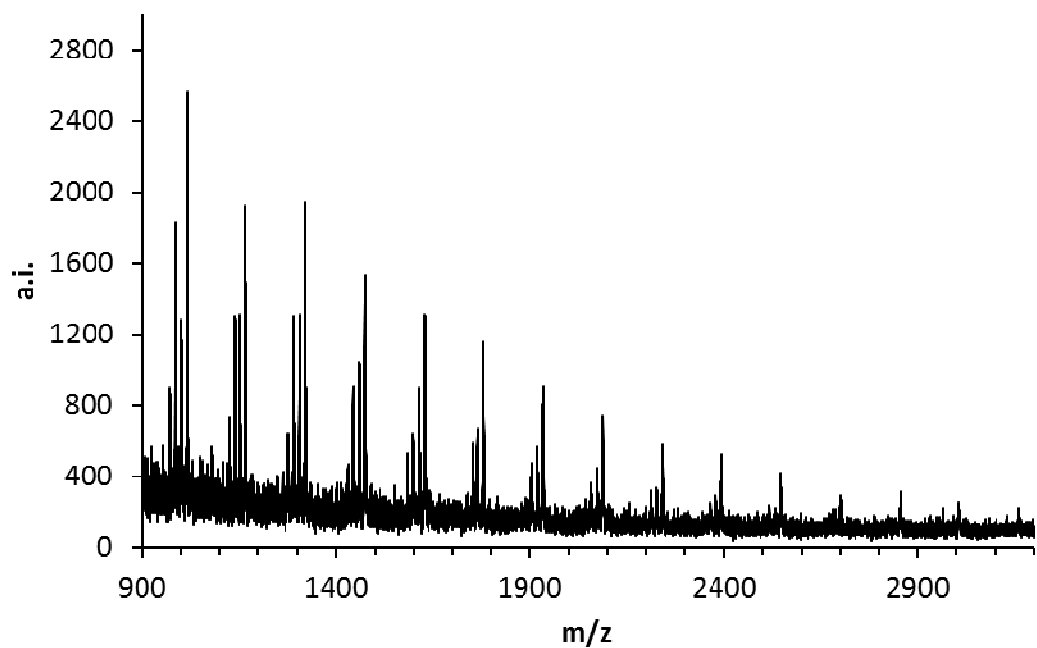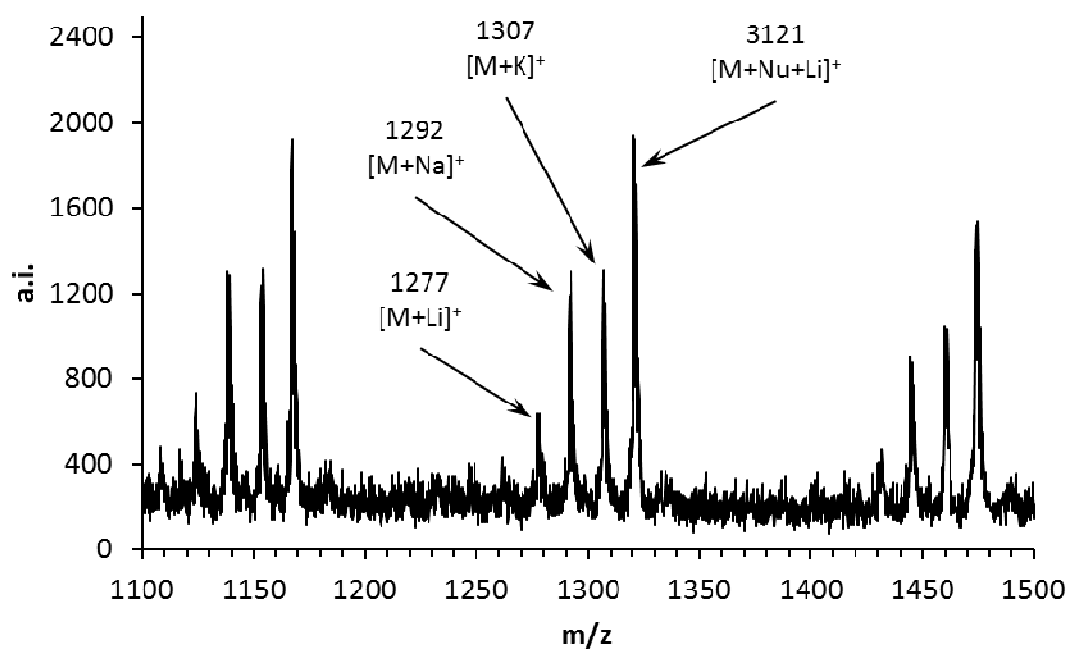

MALDI-TOF spectrum of the product from Table S1, entry 11. M refers to poly(CO) containing 8 subunits with an acetyl *N*-terminus and an imide *C*-terminus. Nu = EtOH.

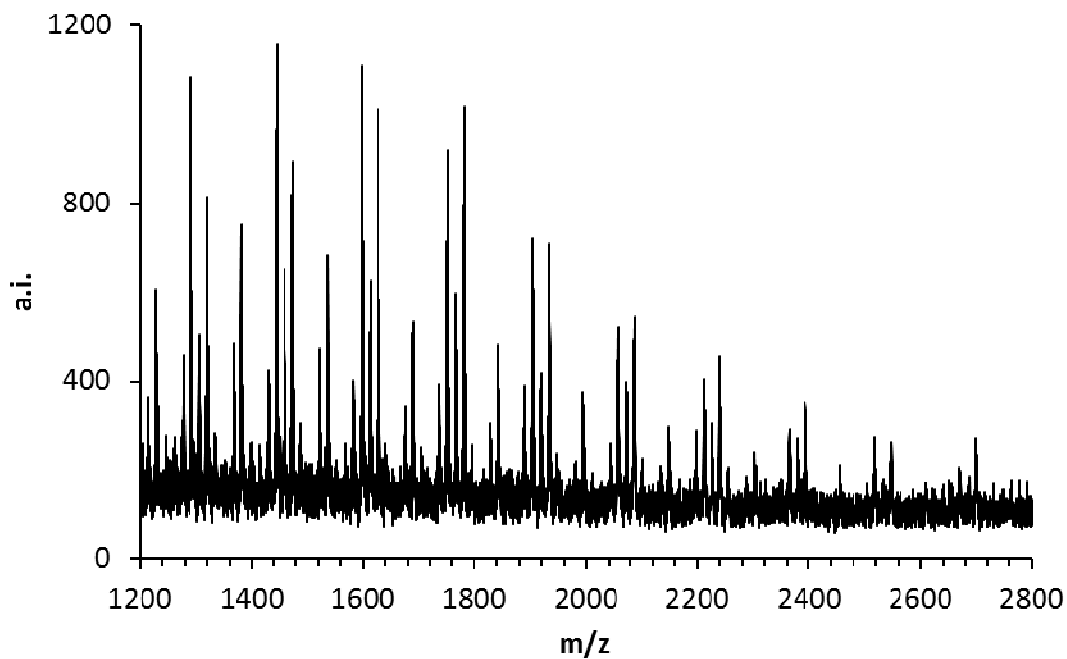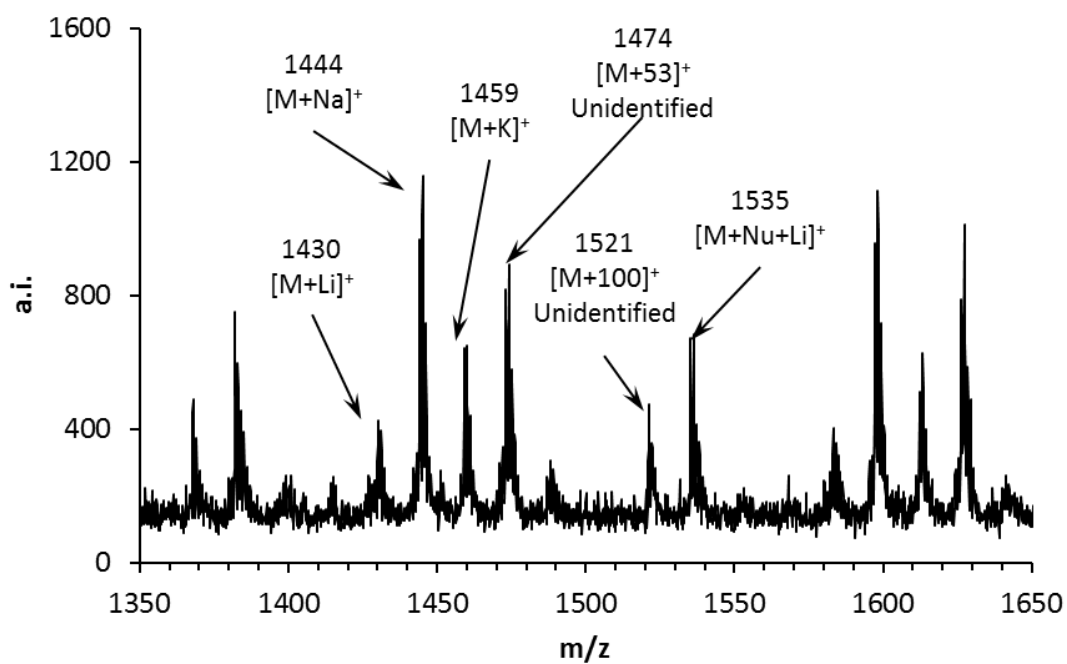

MALDI-TOF spectrum of the product from Table S1, entry 12. M refers to poly(CO) containing 9 subunits with an acetyl *N*-terminus and an imide *C*-terminus. Nu = BnOH.

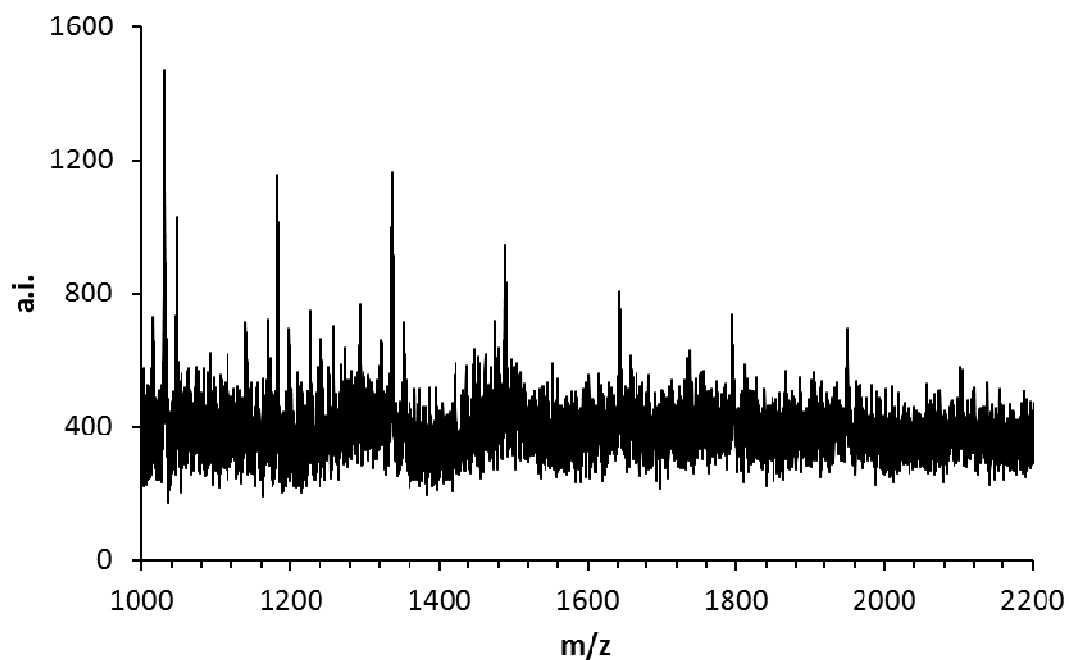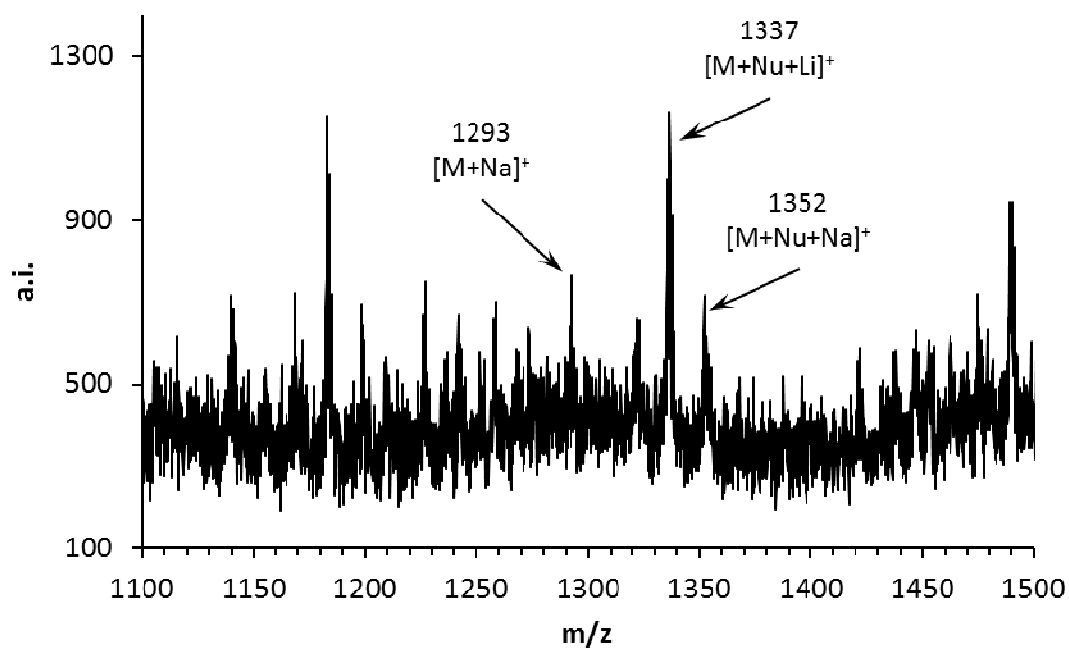

MALDI-TOF spectrum of the product from Table S1, entry 13. M refers to poly(CO) containing 8 subunits with an acetyl *N*-terminus and an imide *C*-terminus. Nu = HOCH<sub>2</sub>CH<sub>2</sub>NH<sub>2</sub>.

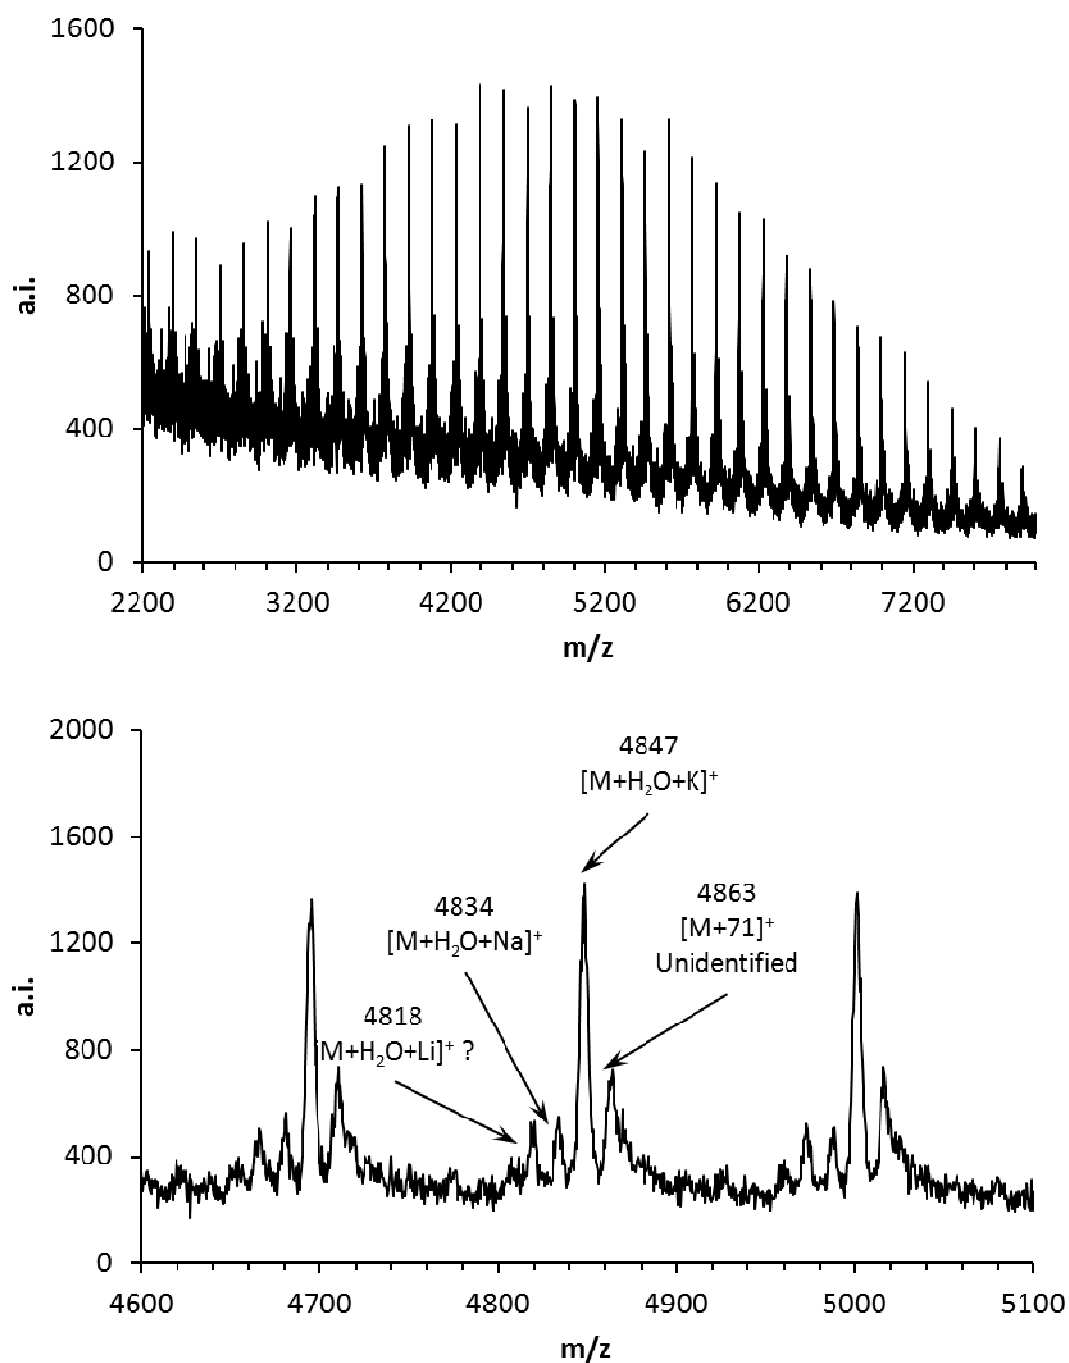

MALDI-TOF spectrum of the product from Table S1, entry 14. M refers to poly(CO) containing 31 subunits with an acetyl *N*-terminus and an imide *C*-terminus.

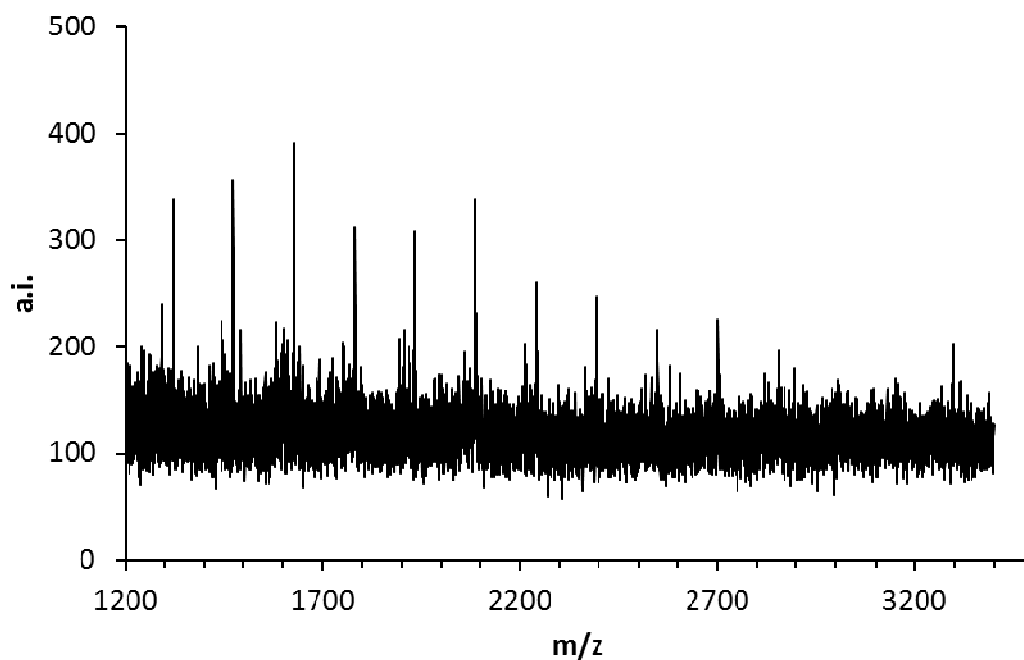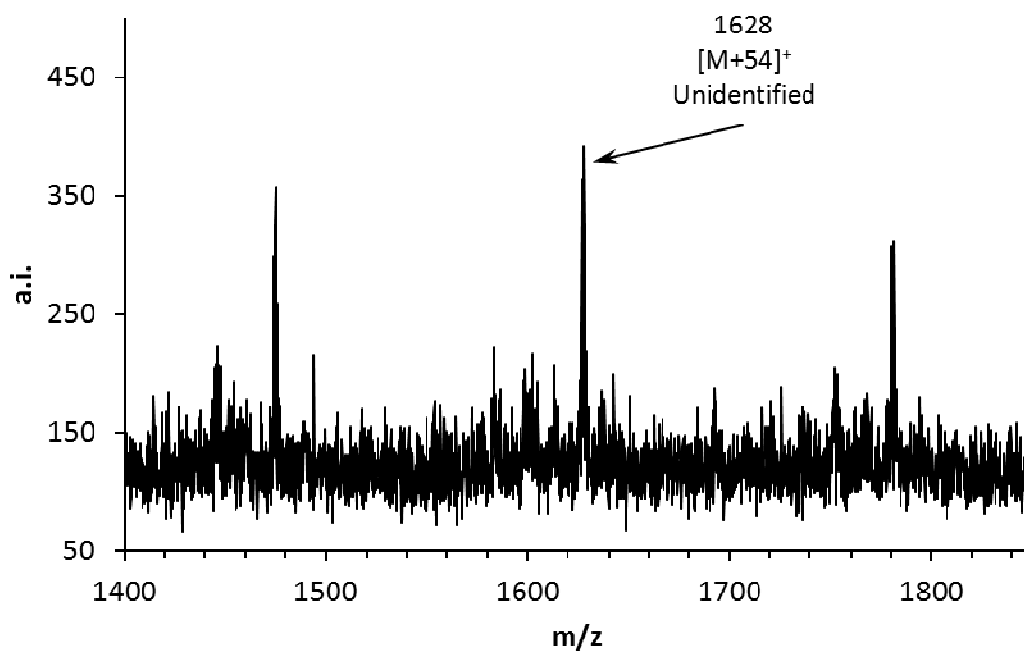

MALDI-TOF spectrum of the product from Table S1, entry 15. M refers to poly(CO) containing 10 subunits with an acetyl *N*-terminus and an imide *C*-terminus.

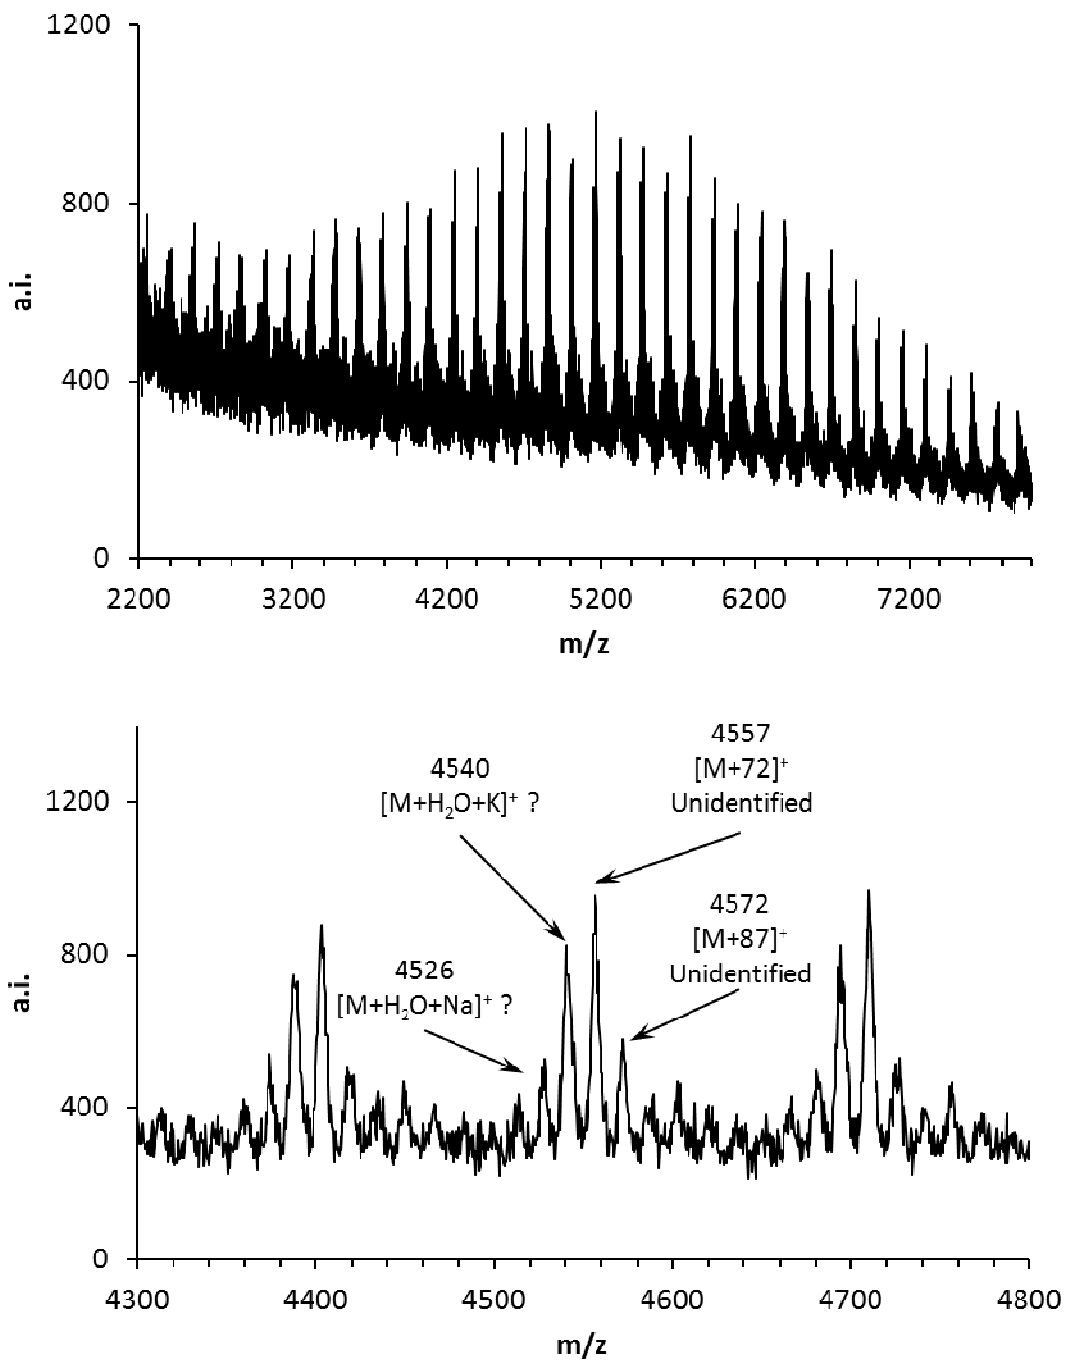

MALDI-TOF spectrum of the product from Table S1, entry 16. M refers to poly(CO) containing 29 subunits with an acetyl *N*-terminus and an imide *C*-terminus.



2 GPC,  $^1\text{H}$  NMR and MALDI-TOF characterization data for C-terminal imide and C-terminal functionalized 37:63 CH:MM nylon-3 random copolymers ( $\text{R}'$  = side chain of either CH or MM)

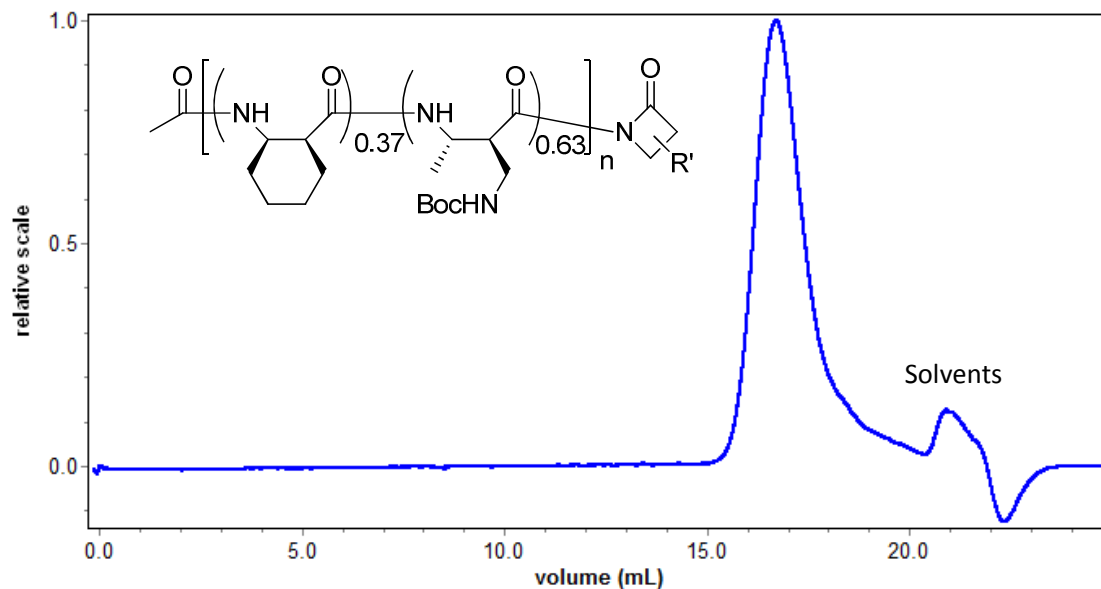

GPC trace (RI detection) of Boc-protected **1** in THF.  $M_n = 4627$ , PDI = 1.10,  $dn/dc = 0.1$ .

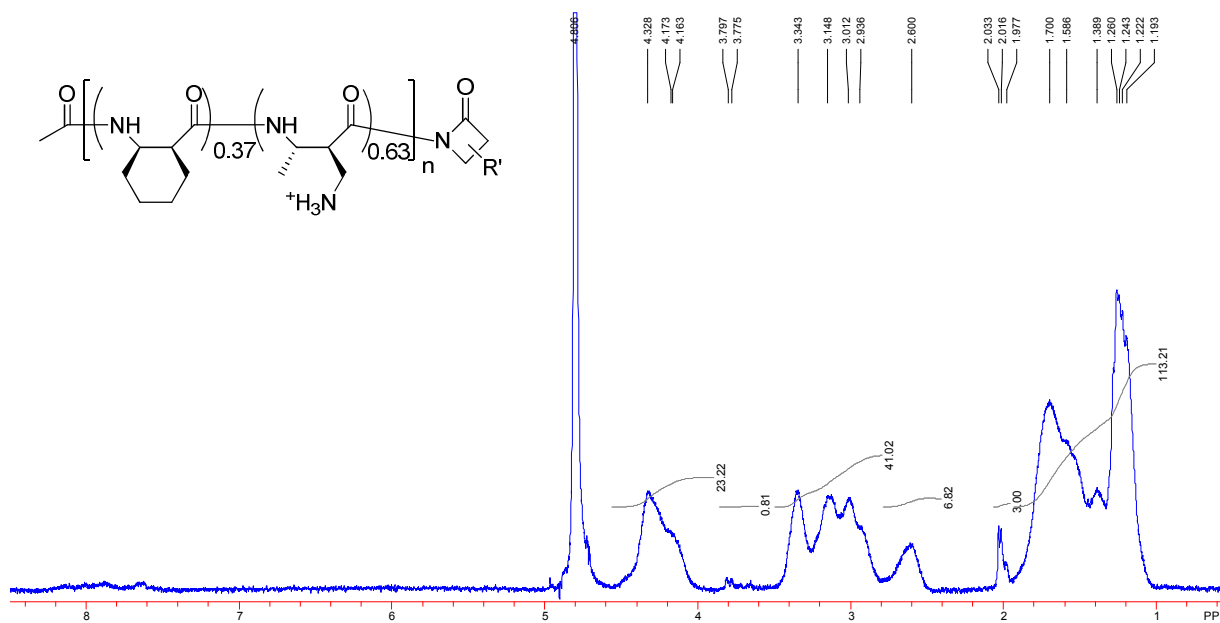

$^1\text{H}$  NMR of **1** in  $\text{D}_2\text{O}$  at 10 mg/mL.

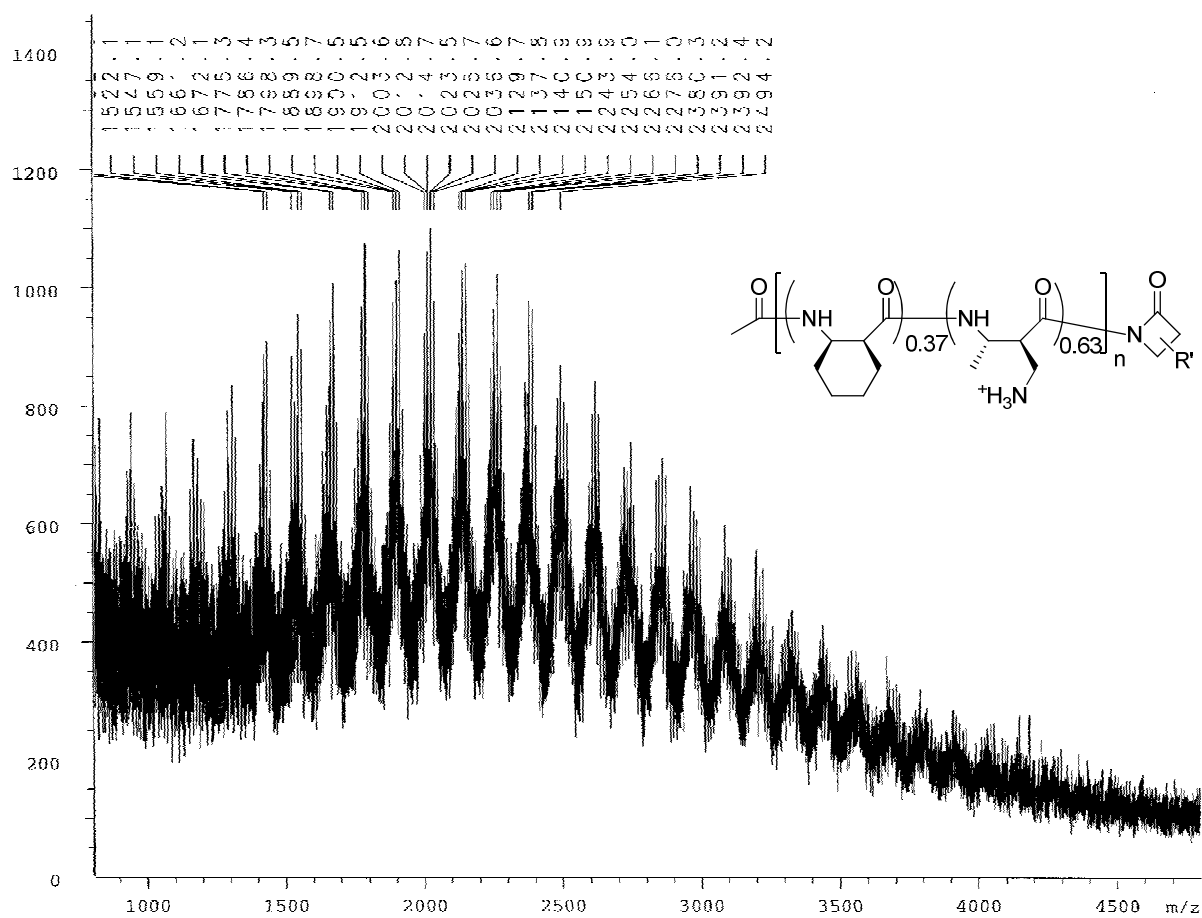

MALDI-TOF spectrum of **1**.

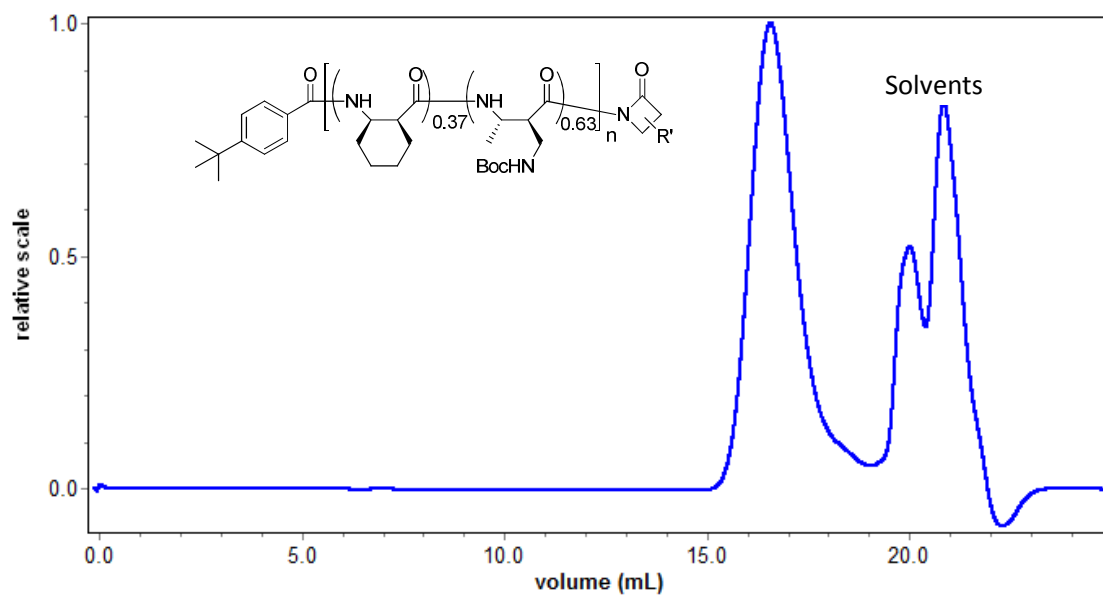

GPC trace (RI detection) of Boc-protected **2** in THF.  $M_n = 4749$ , PDI = 1.13,  $dn/dc = 0.1$ .

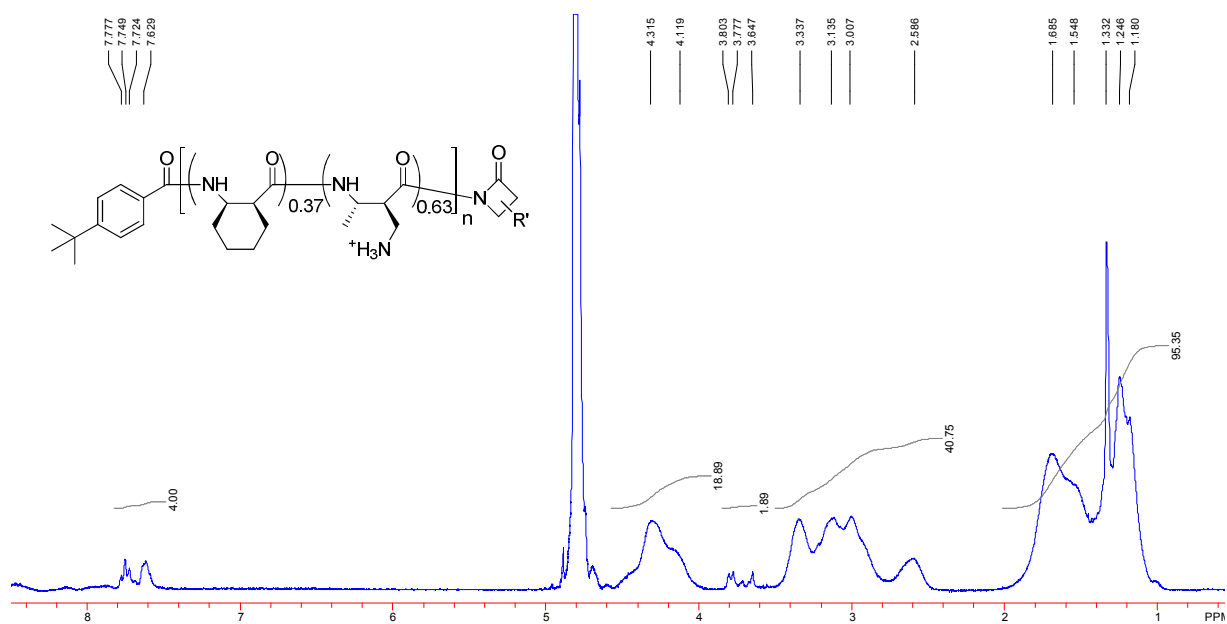

$^1\text{H}$  NMR of **2** in  $\text{D}_2\text{O}$  at 10 mg/mL.

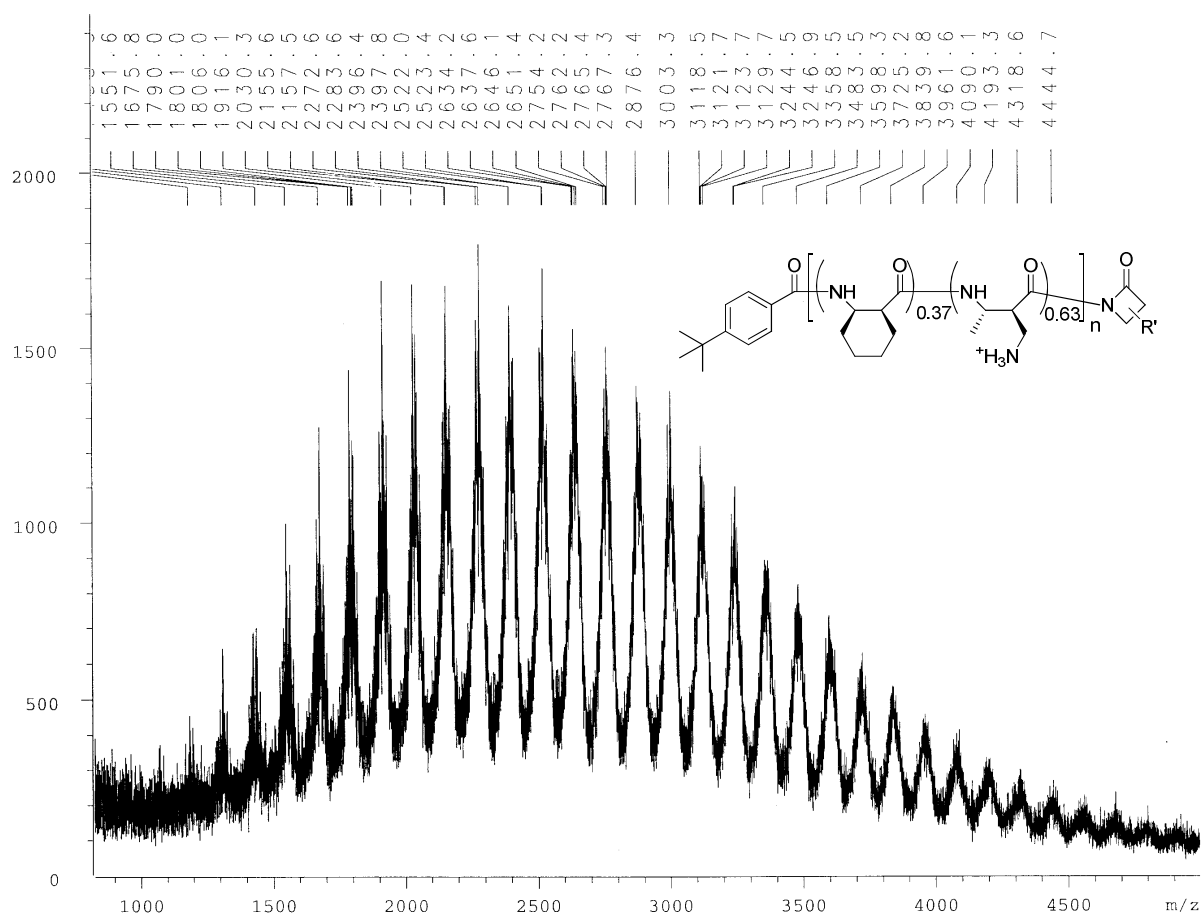

MALDI-TOF spectrum of **2**.

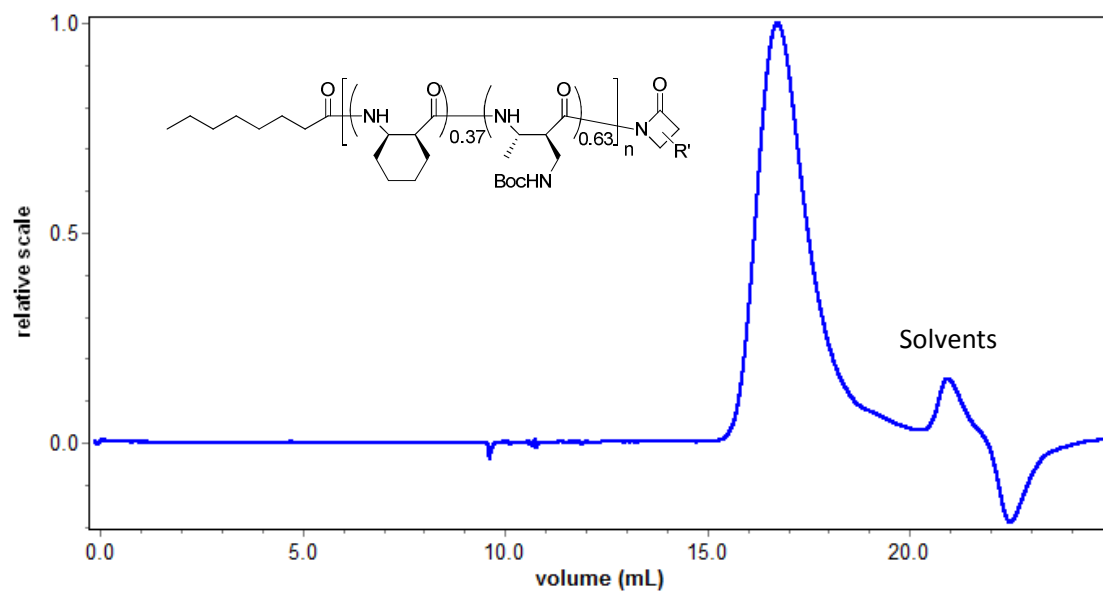

GPC trace (RI detection) of Boc-protected **3** in THF.  $M_n = 5845$ , PDI = 1.15,  $dn/dc = 0.1$ .

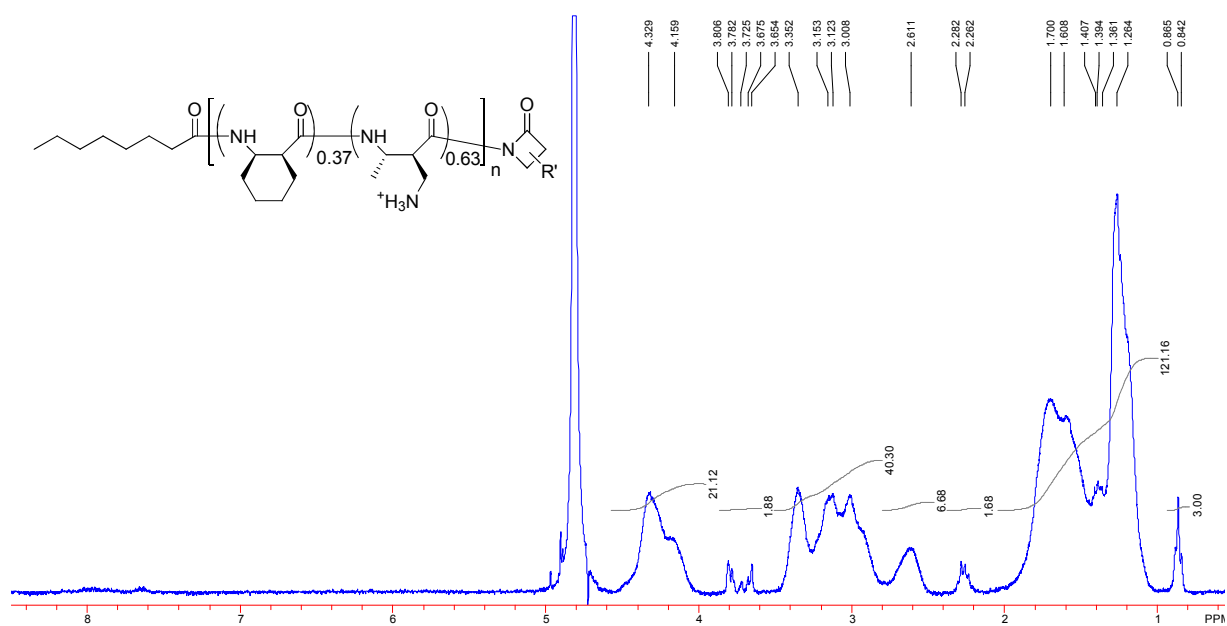

$^1\text{H}$  NMR of **3** in  $\text{D}_2\text{O}$  at 10 mg/mL.

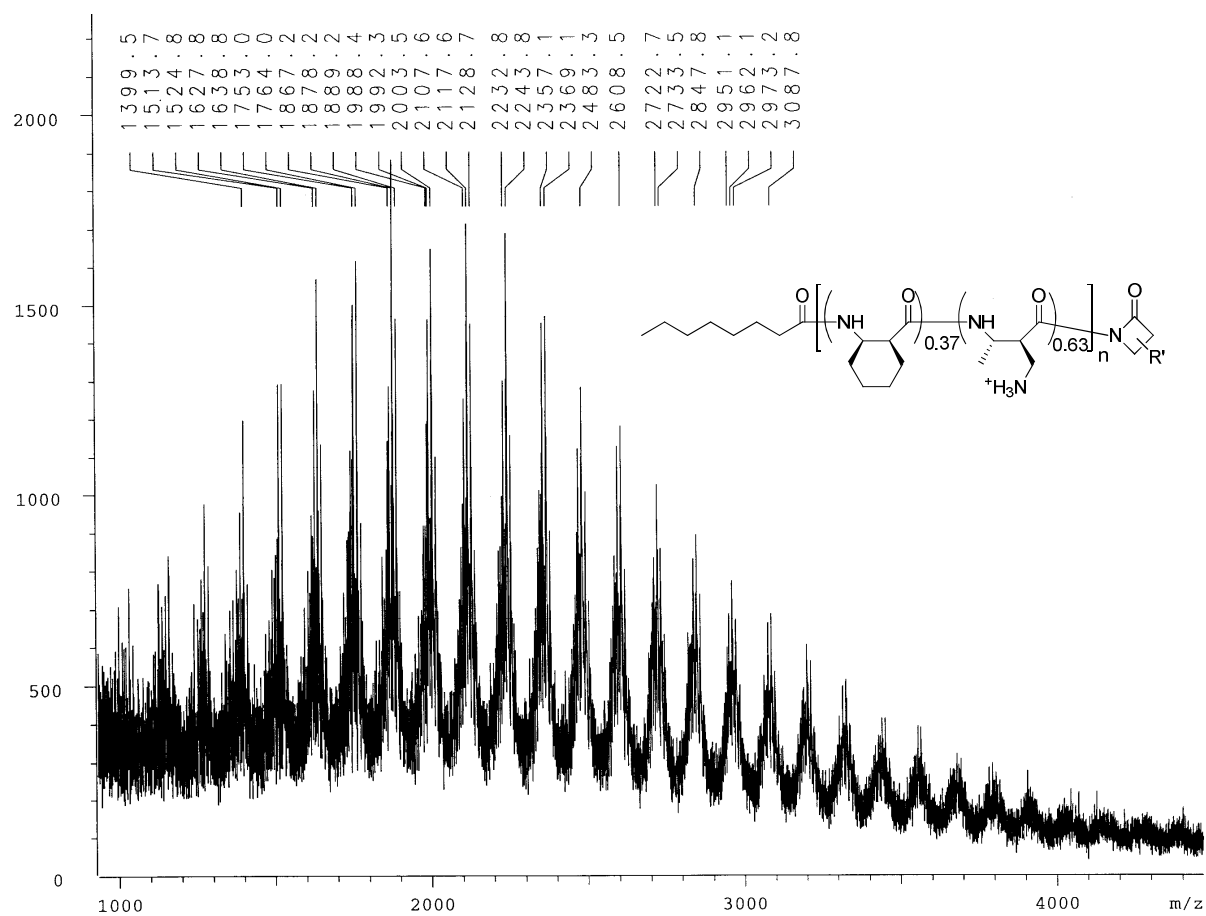

MALDI-TOF spectrum of **3**.

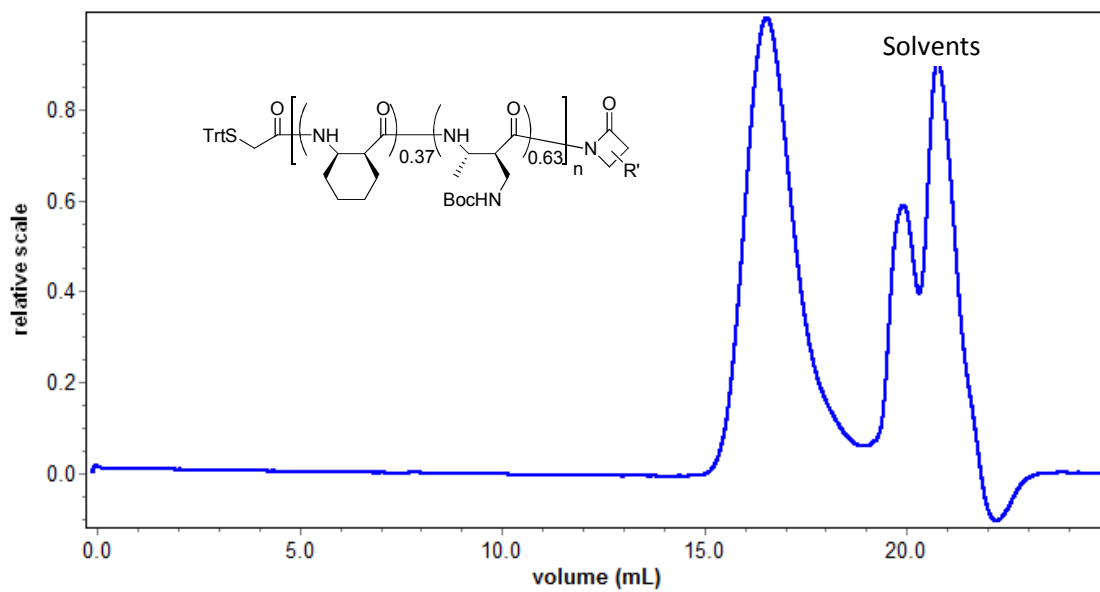

GPC trace (RI detection) of Boc-protected **4** (with trityl-protected thiol) in THF.  $M_n = 5337$ , PDI = 1.07,  $dn/dc = 0.1$ .

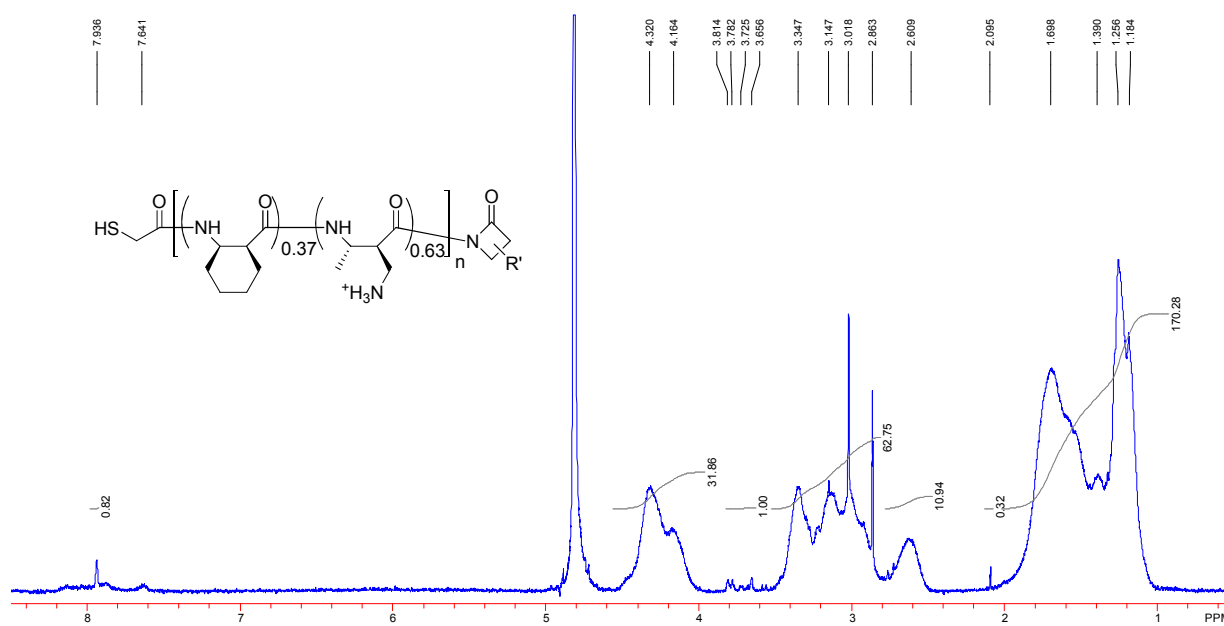

$^1\text{H}$  NMR of **4** in  $\text{D}_2\text{O}$  at 10 mg/mL.

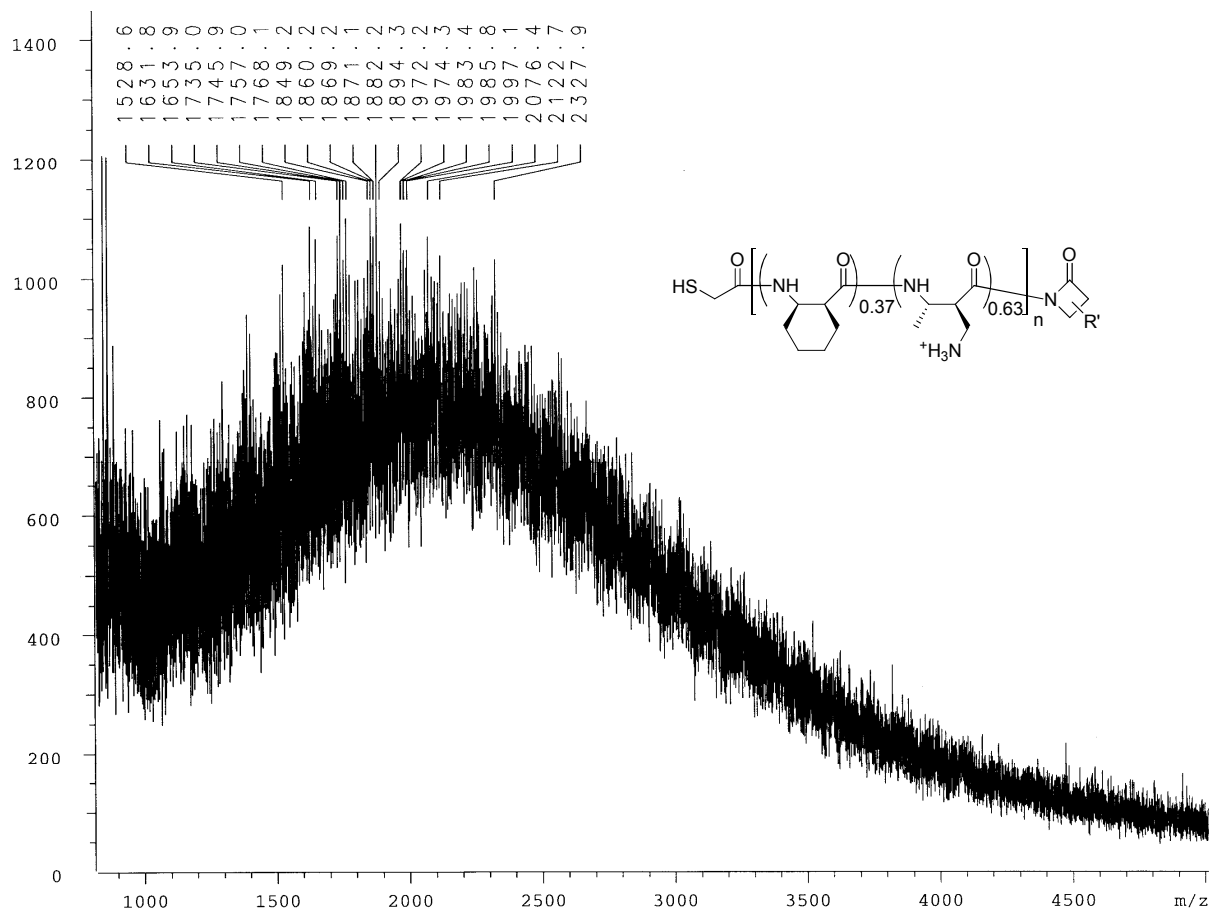

MALDI-TOF spectrum of **4**.



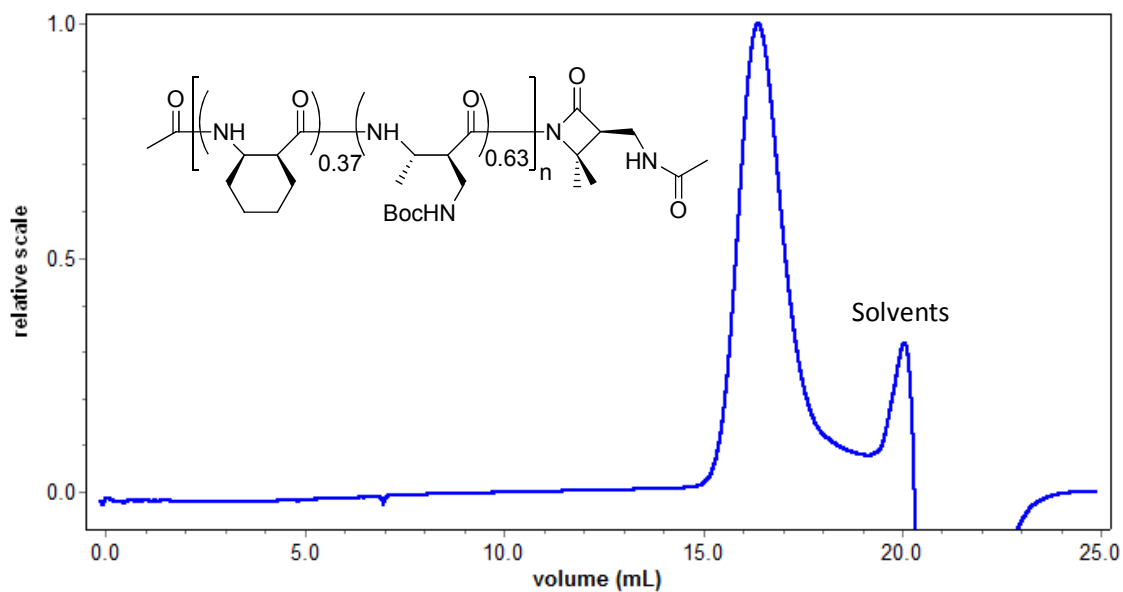

GPC trace (RI detection) of Boc-protected **1B-a** in THF.  $M_n = 4890$ , PDI = 1.13,  $dn/dc = 0.1$ .

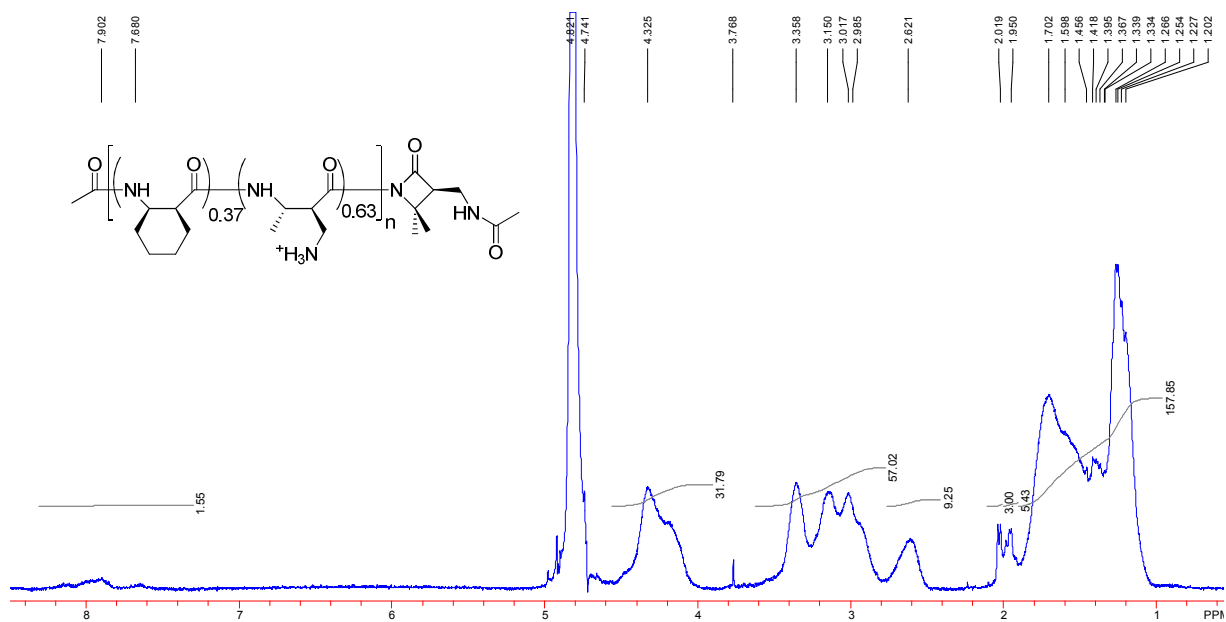

$^1H$  NMR of **1B-a** in D<sub>2</sub>O at 10 mg/mL.

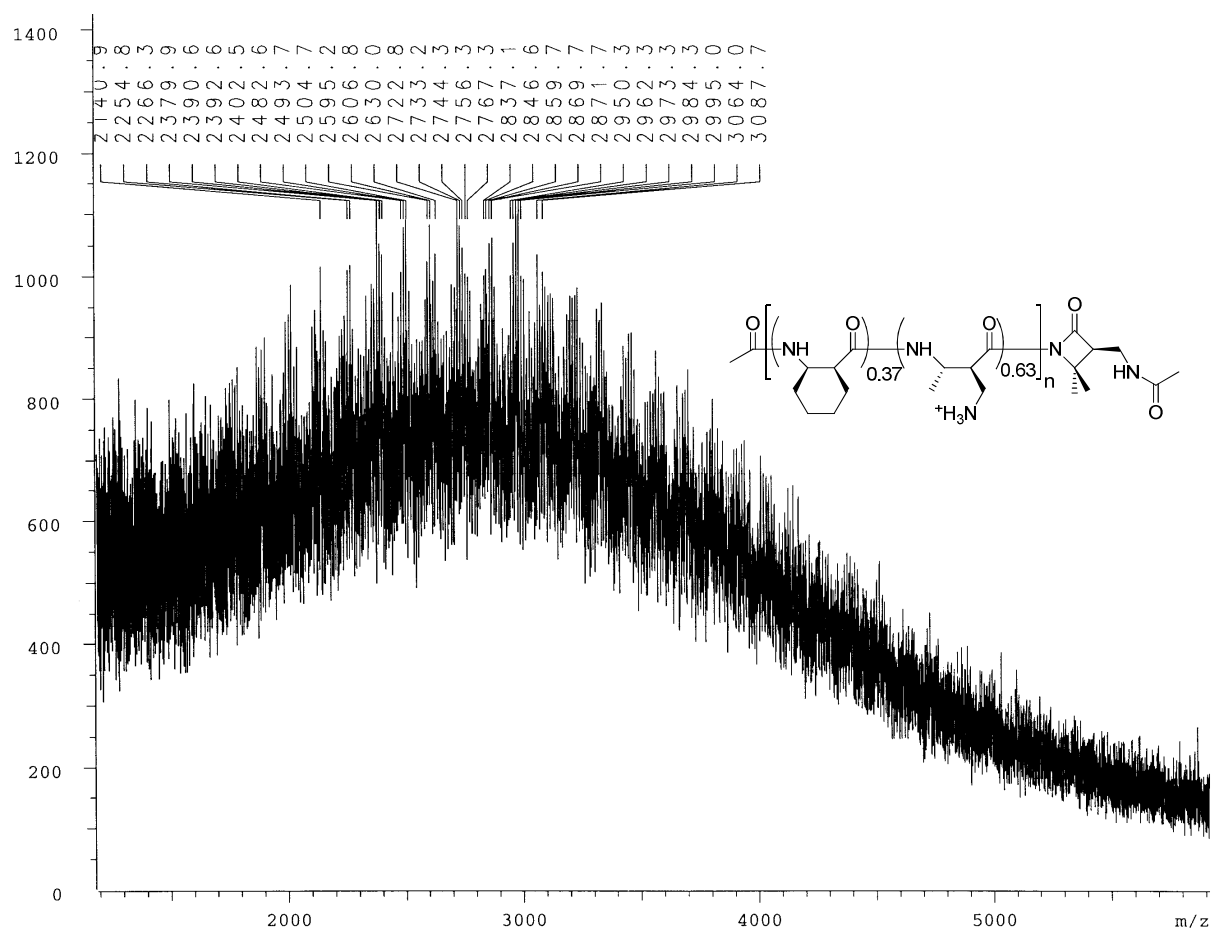

MALDI-TOF spectrum of **1B-a**.

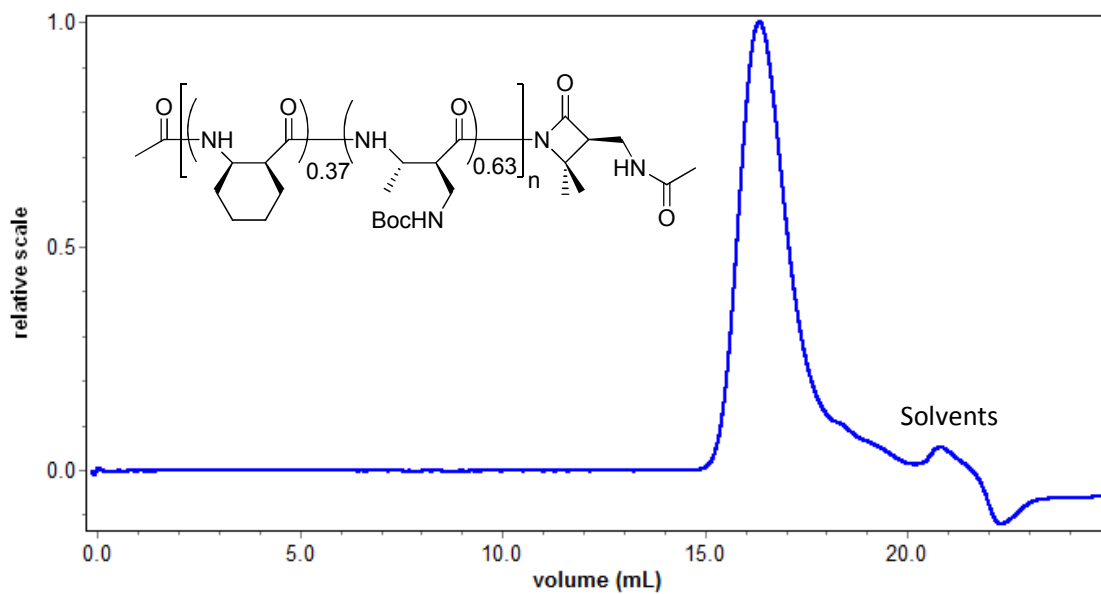

GPC trace (RI detection) of Boc-protected **1B-b** in THF.  $M_n = 5975$ , PDI = 1.07,  $dn/dc = 0.1$ .

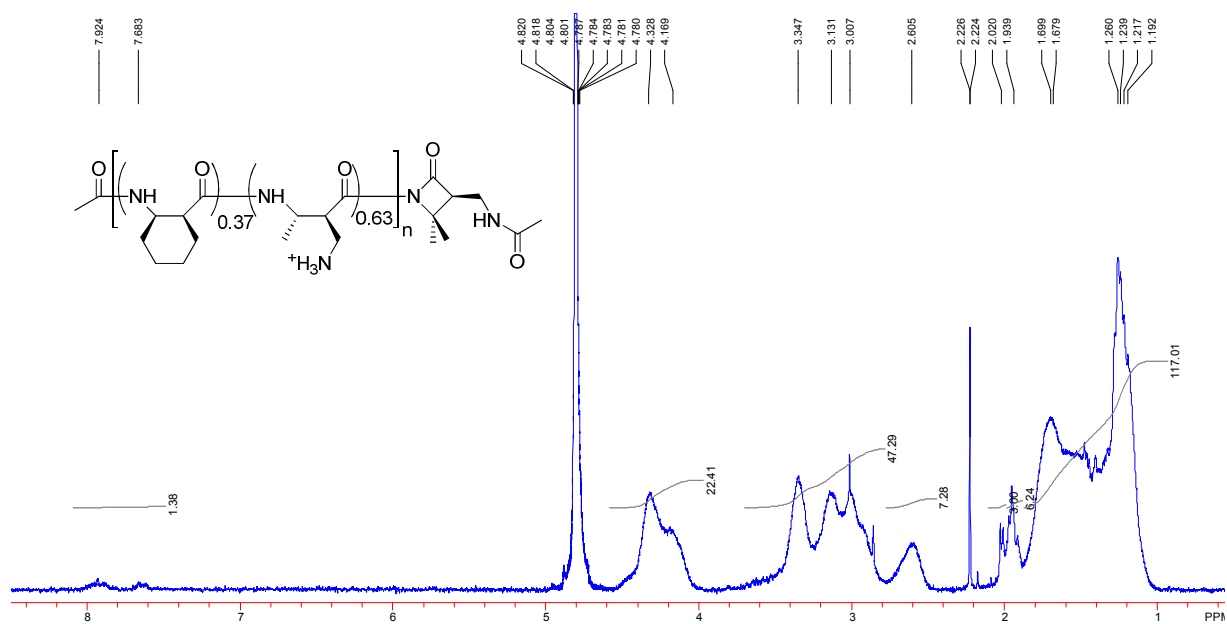

$^1H$  NMR of **1B-b** in  $D_2O$  at 10 mg/mL.

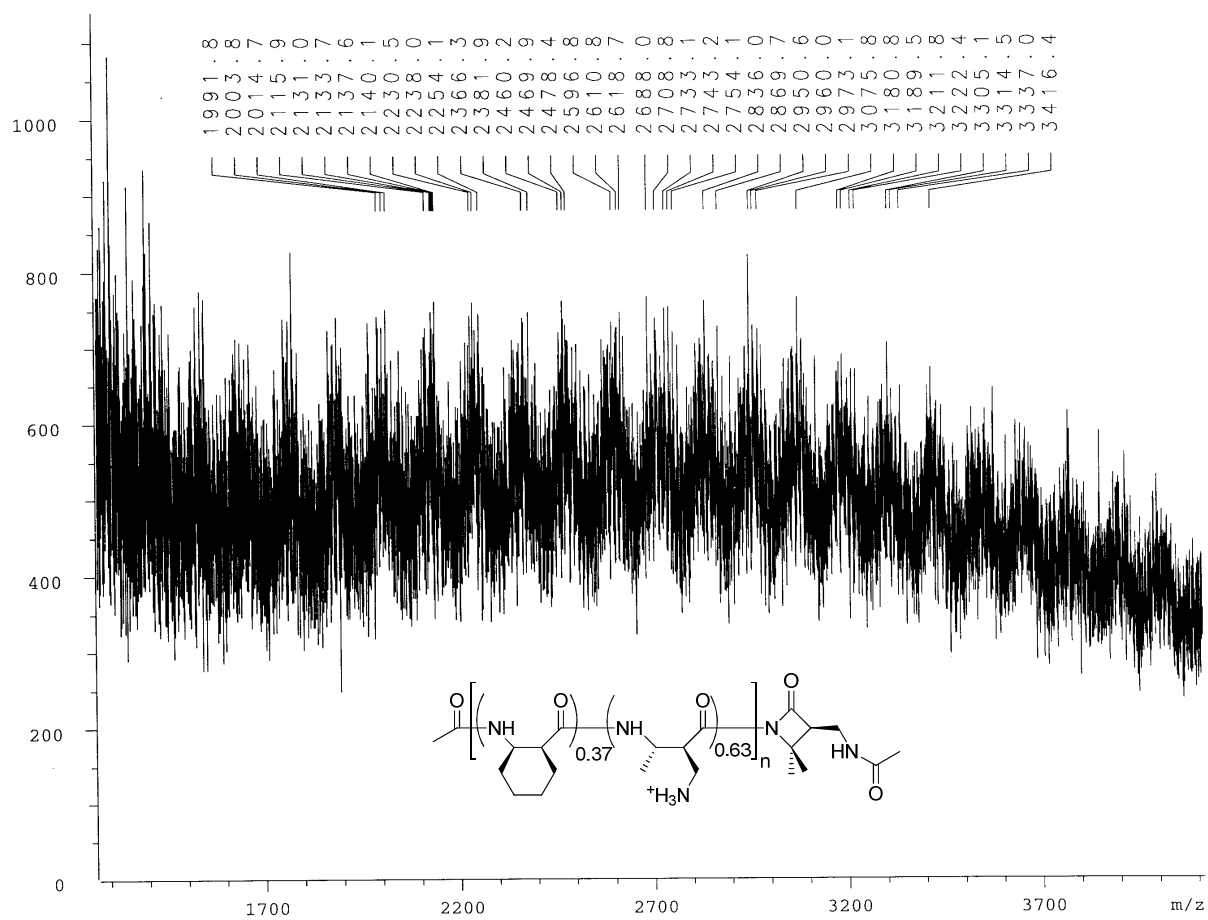

MALDI-TOF spectrum of **1B-b**.

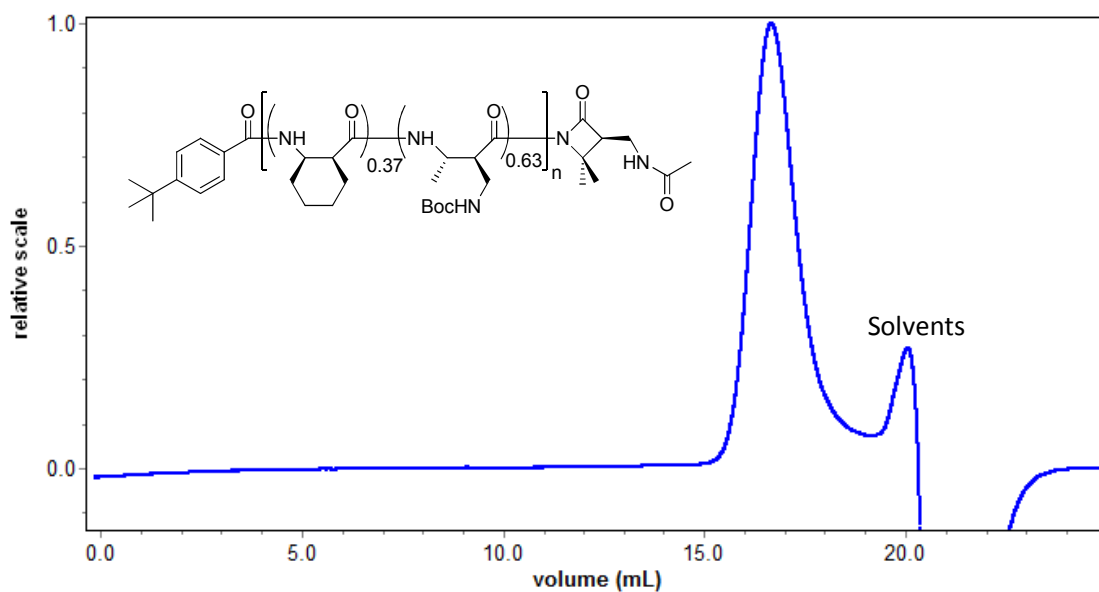

GPC trace (RI detection) of Boc-protected **2B-a** in THF.  $M_n = 3948$ , PDI = 1.13,  $dn/dc = 0.1$ .

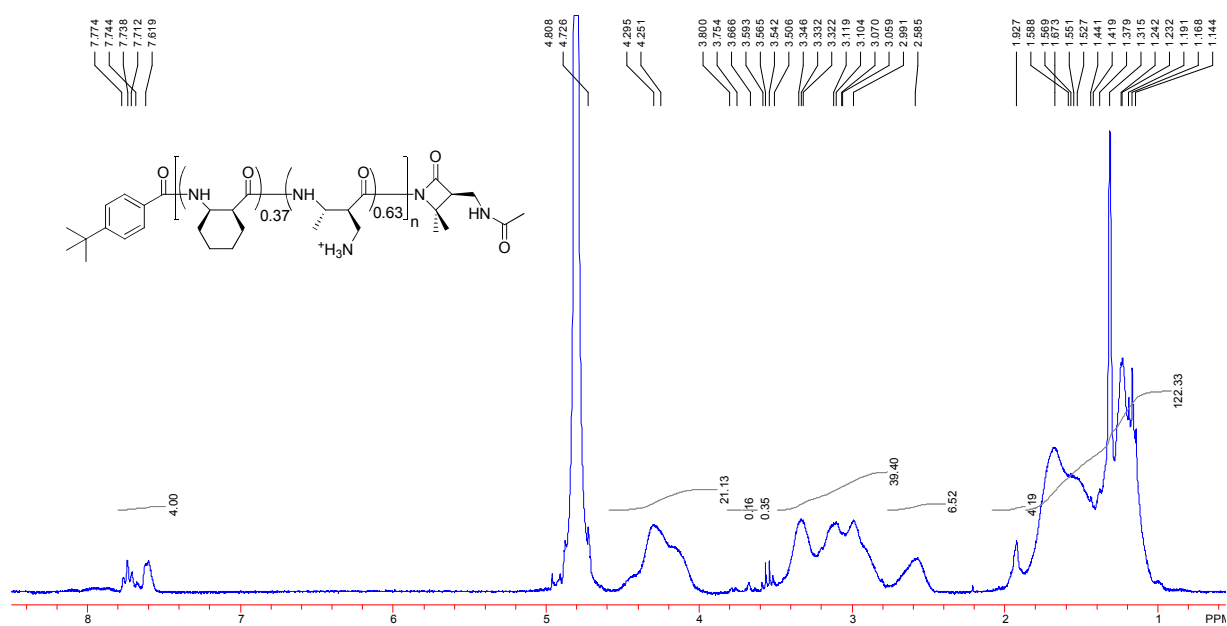

$^1\text{H}$  NMR of **2B-a** in  $\text{D}_2\text{O}$  at 10 mg/mL.

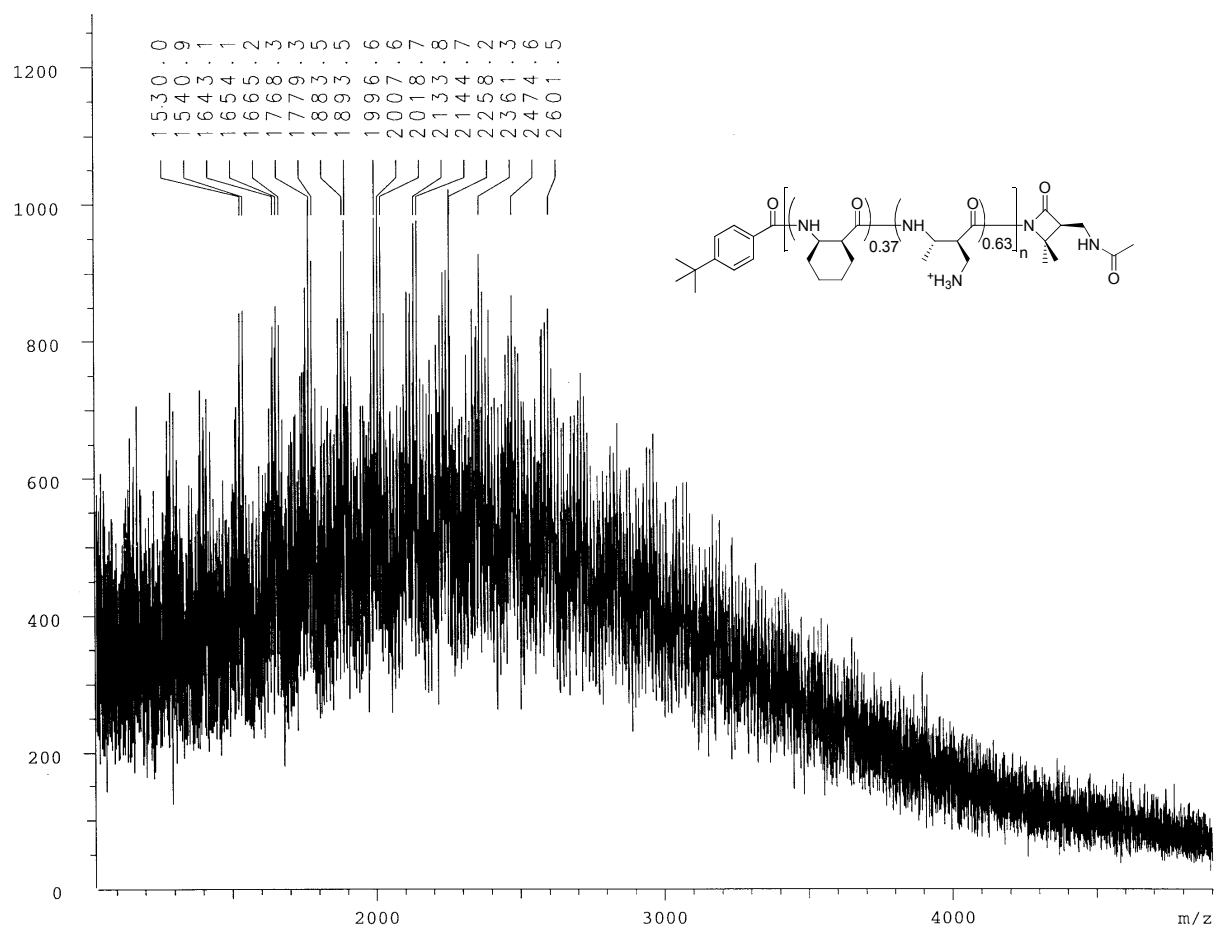

MALDI-TOF spectrum of **2B-a**.

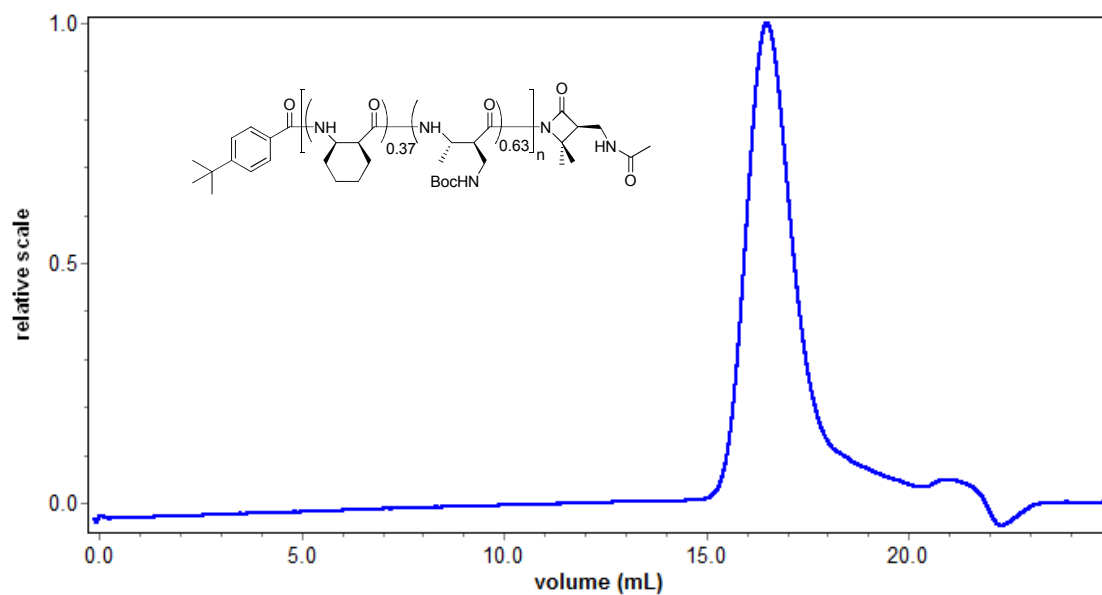

GPC trace (RI detection) of Boc-protected **2B-b** in THF.  $M_n = 4837$ , PDI = 1.12,  $dn/dc = 0.1$ .

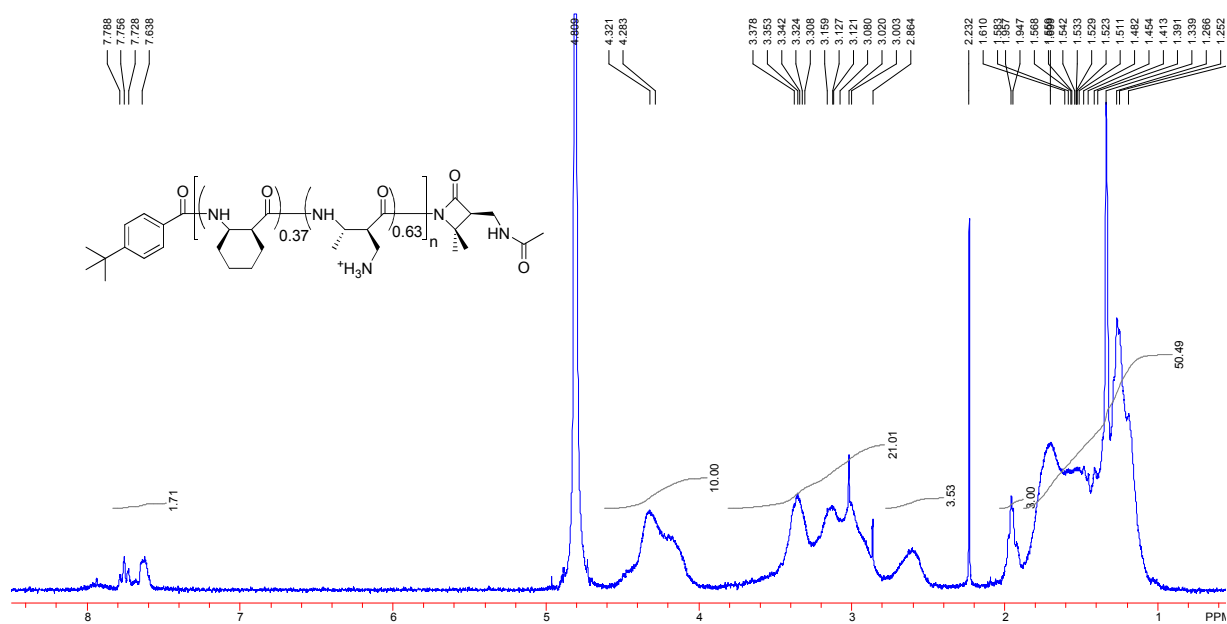

$^1\text{H}$  NMR of **2B-b** in  $\text{D}_2\text{O}$  at 10 mg/mL.

Polymer **2B-b** does not produce a MALDI-TOF spectrum.

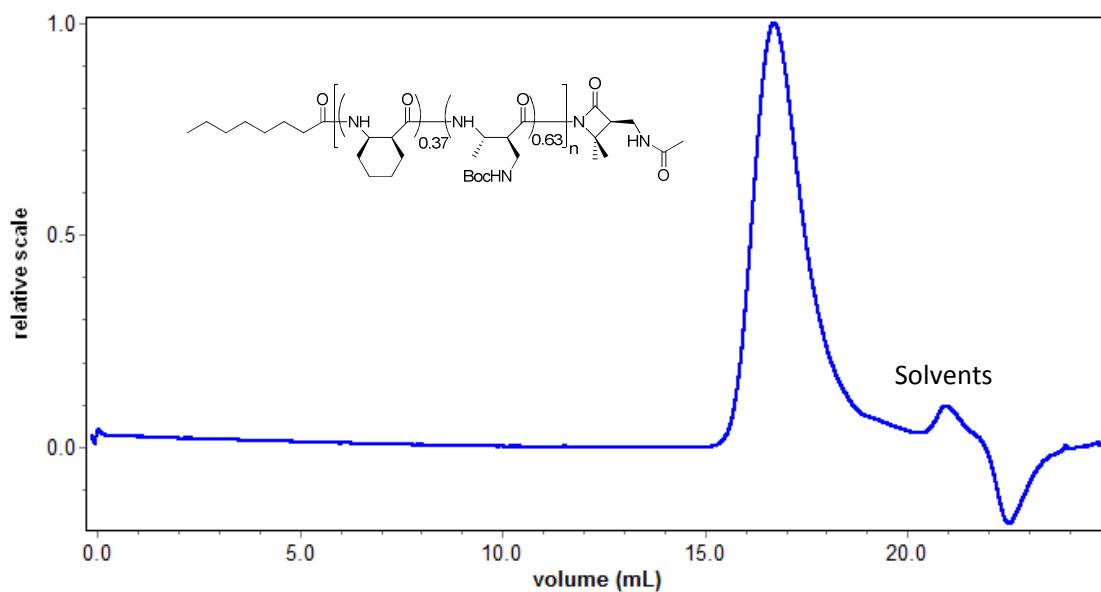

GPC trace (RI detection) of Boc-protected **3B** in THF.  $M_n = 4112$ , PDI = 1.12,  $dn/dc = 0.1$ .

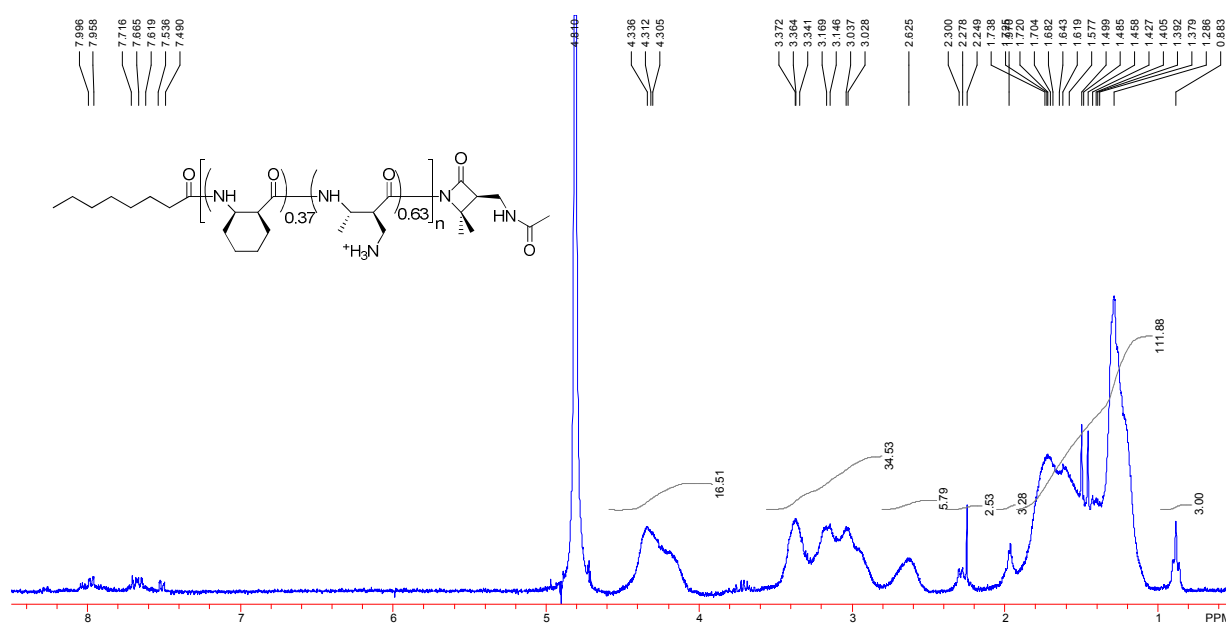

$^1\text{H}$  NMR of **3B** in  $\text{D}_2\text{O}$  at 10 mg/mL.



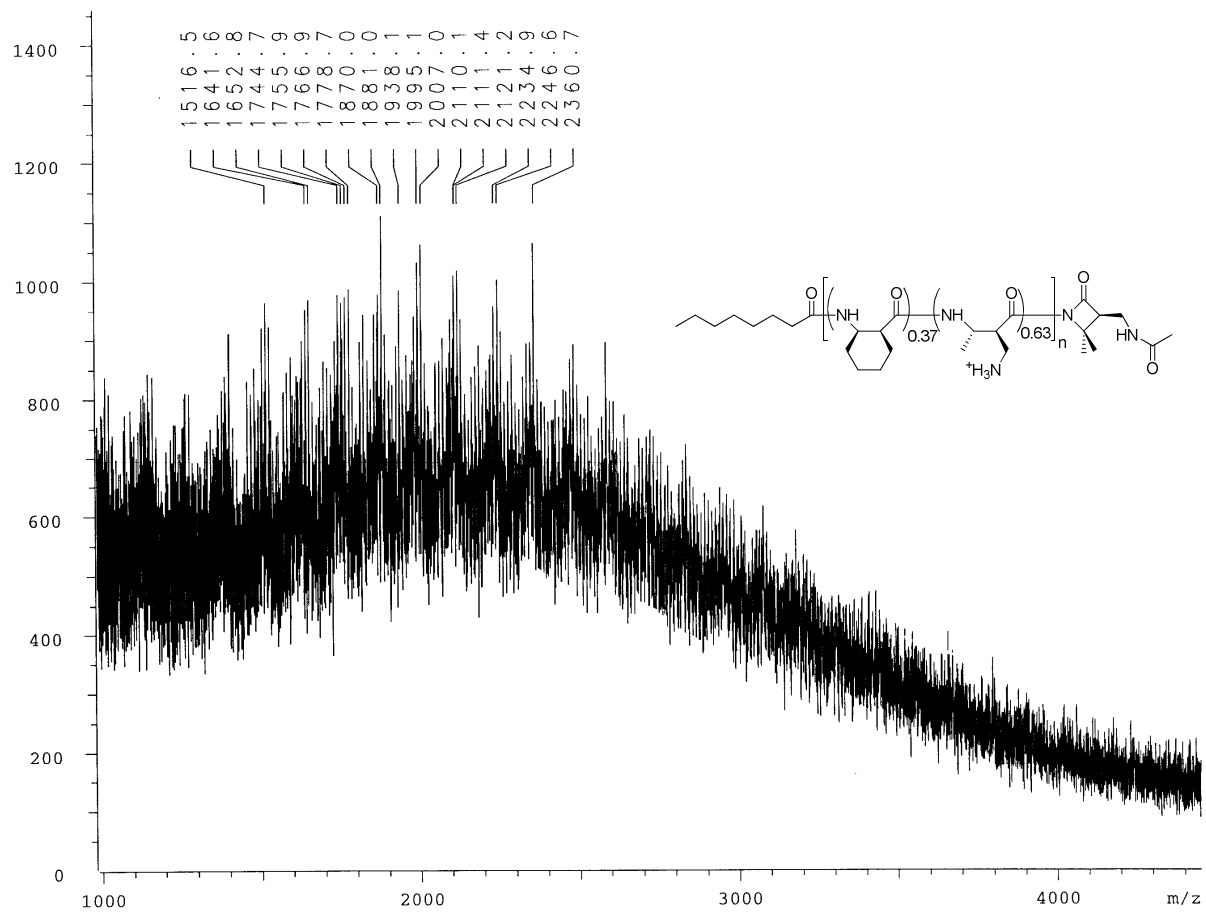

MALDI-TOF spectrum of **3B**.

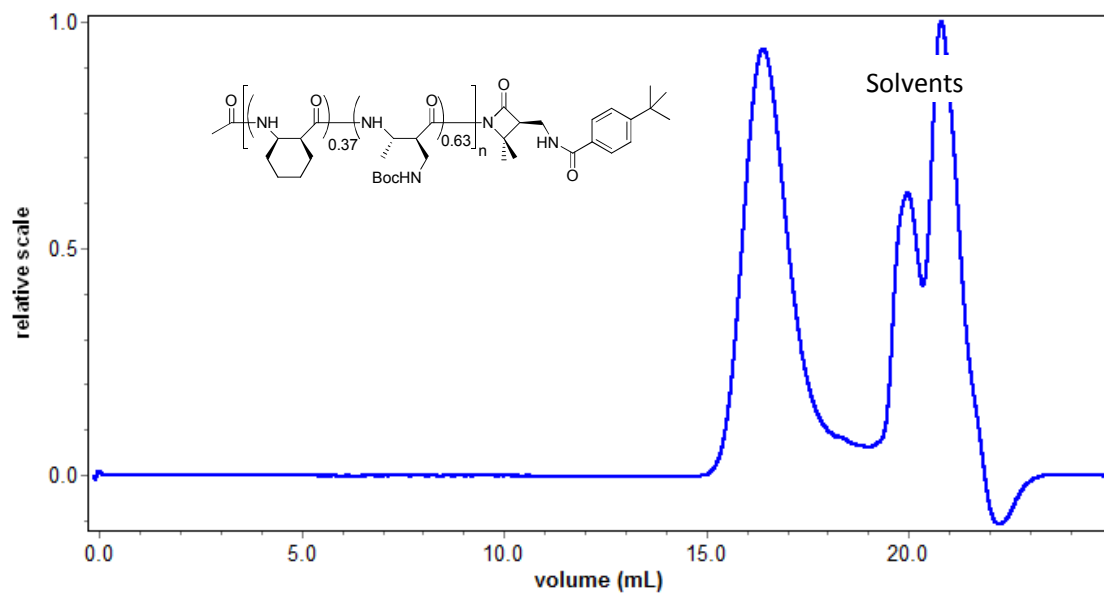

GPC trace (RI detection) of Boc-protected **1C-a** in THF.  $M_n = 5072$ , PDI = 1.09,  $dn/dc = 0.1$ .

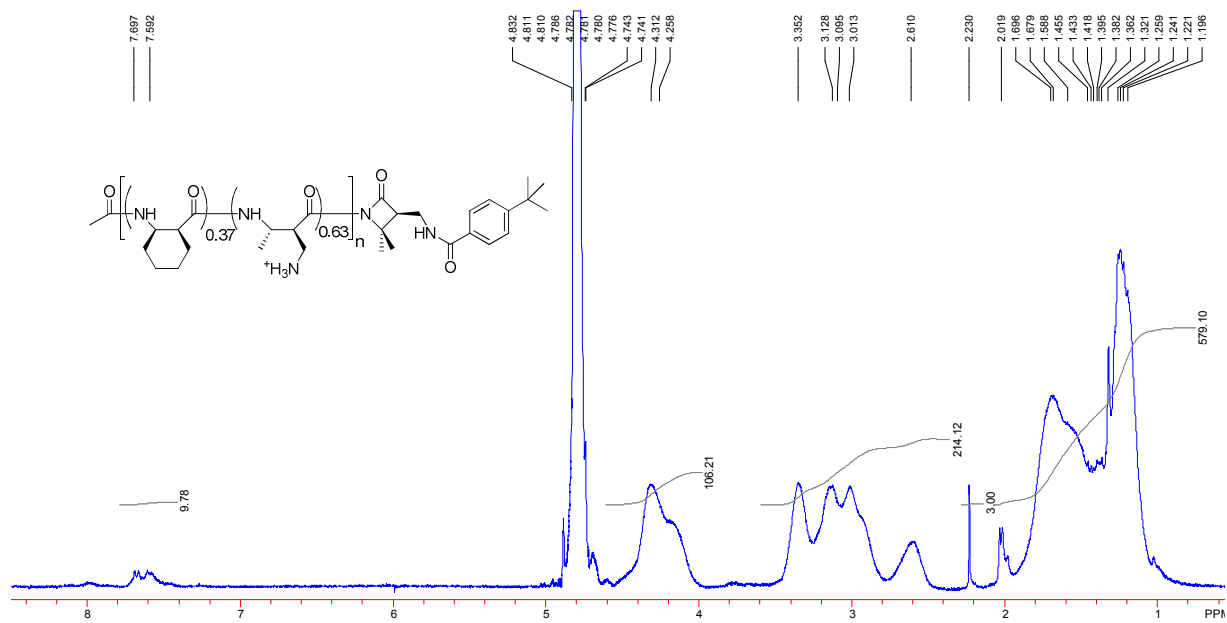

$^1\text{H}$  NMR of **1C-a** in  $\text{D}_2\text{O}$  at 10 mg/mL.

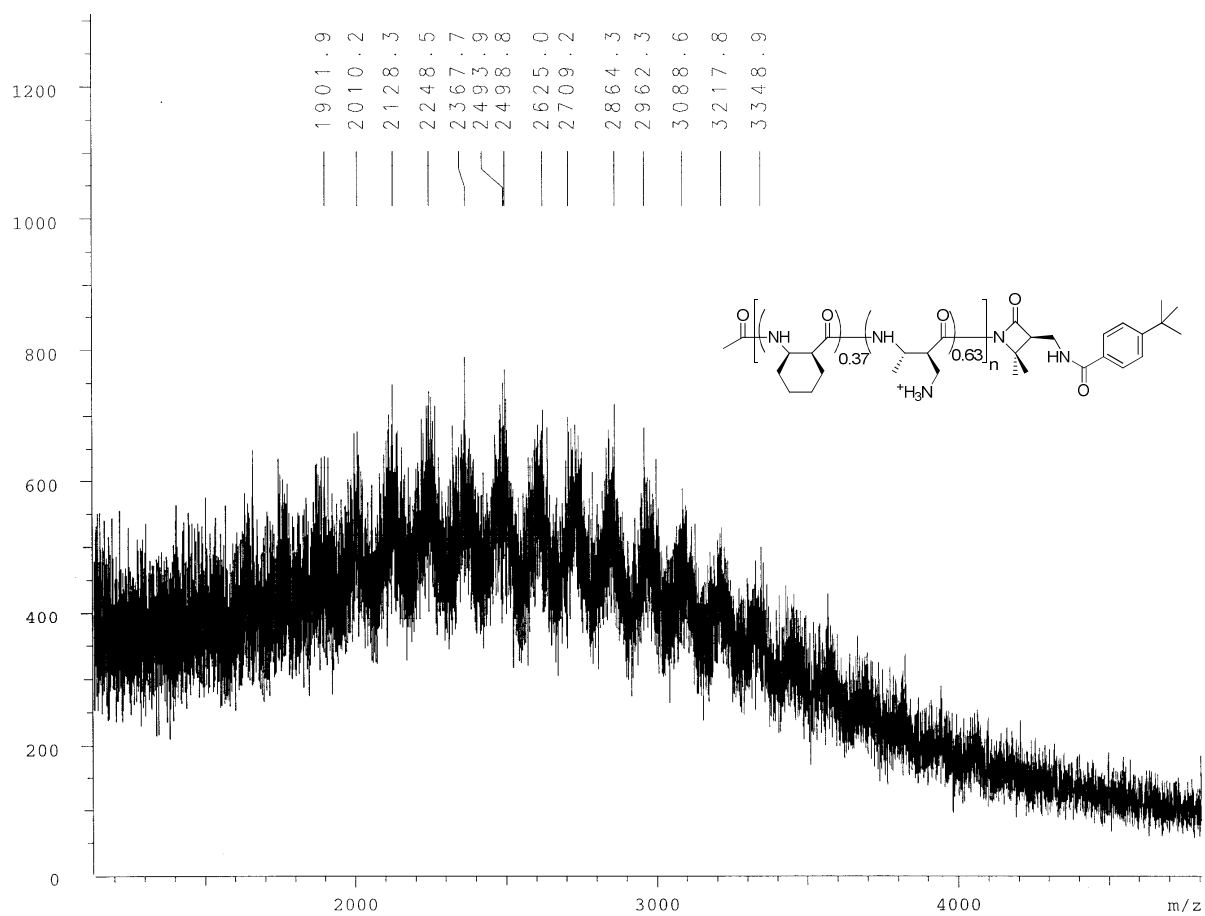

MALDI-TOF spectrum of **1C-a**.

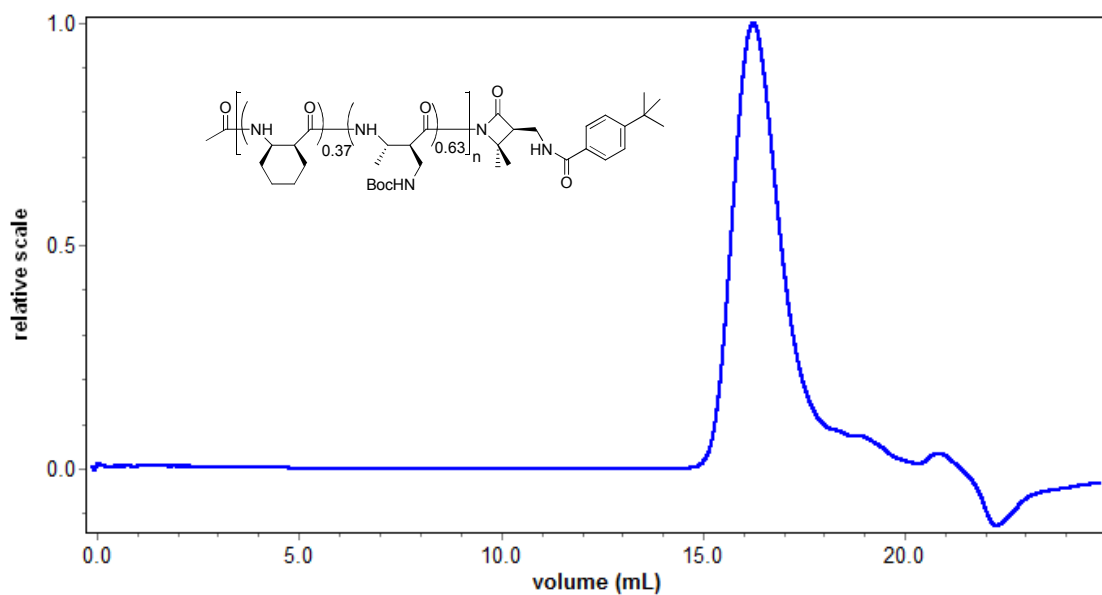

GPC trace (RI detection) of Boc-protected **1C-b** in THF.  $M_n = 6135$ , PDI = 1.12,  $dn/dc = 0.1$ .

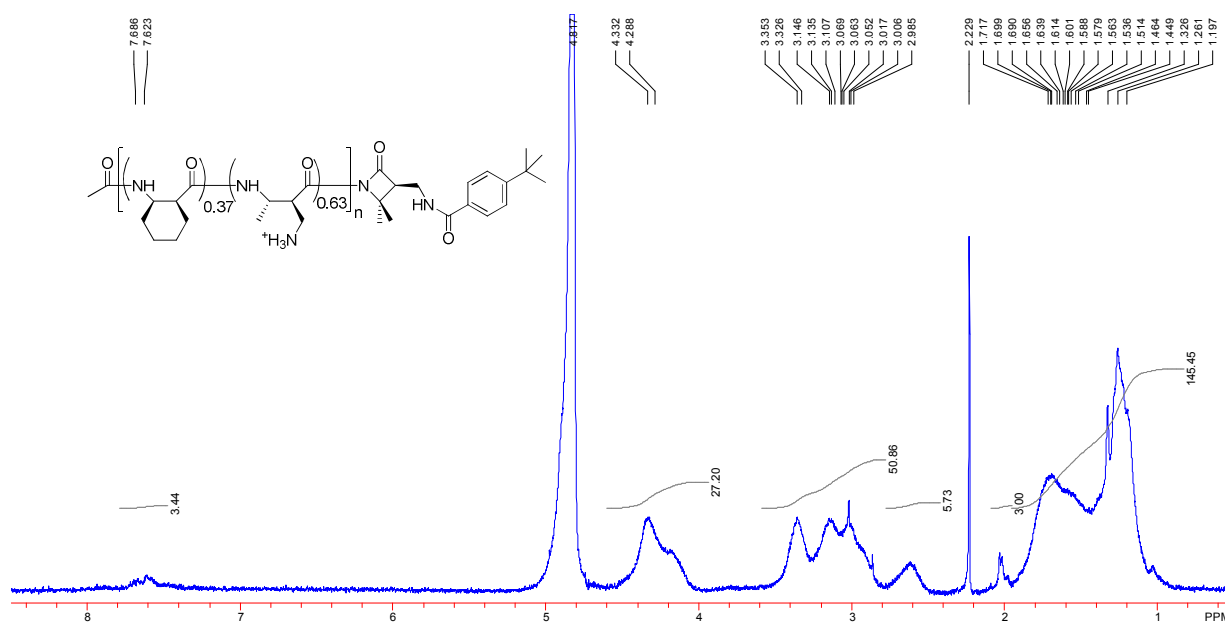

$^1\text{H}$  NMR of **1C-b** in  $\text{D}_2\text{O}$  at 10 mg/mL.

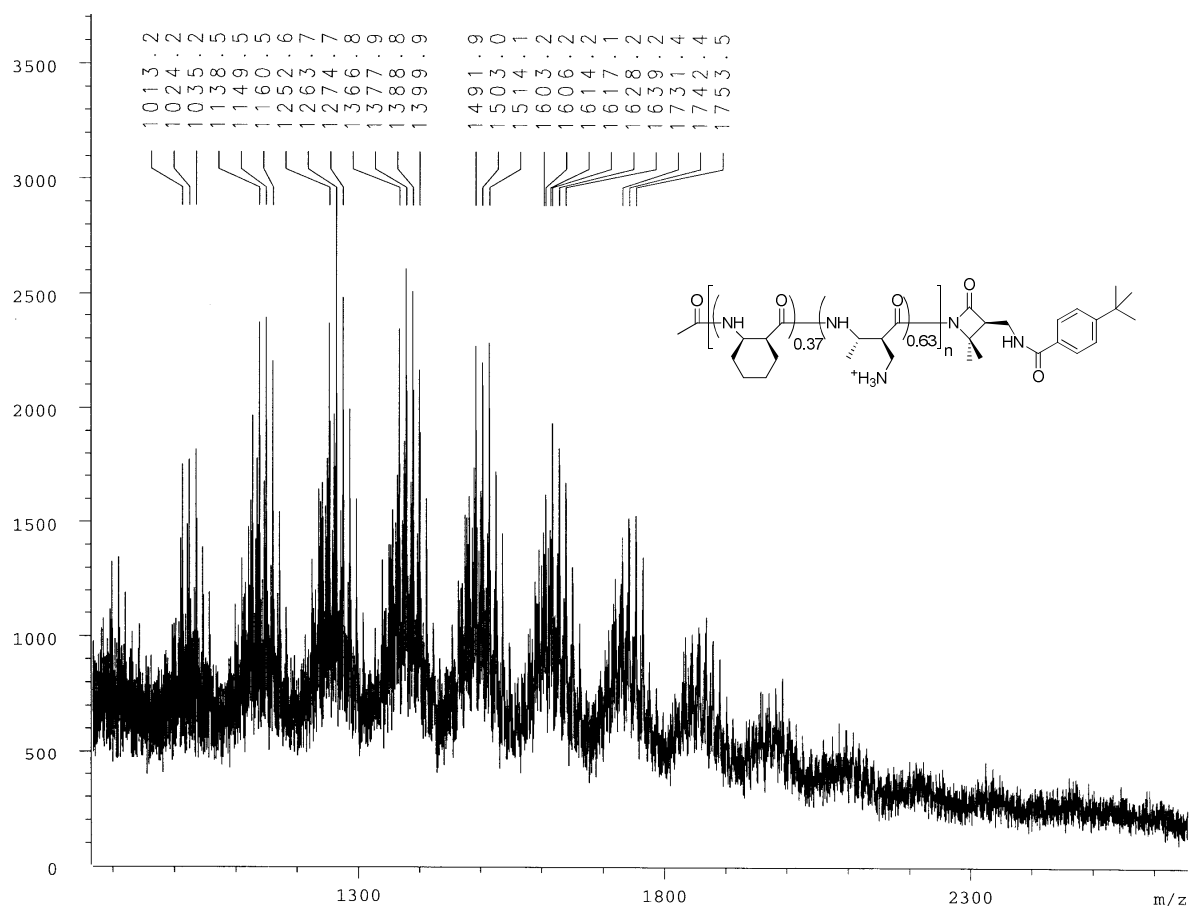

MALDI-TOF spectrum of **1C-b**.

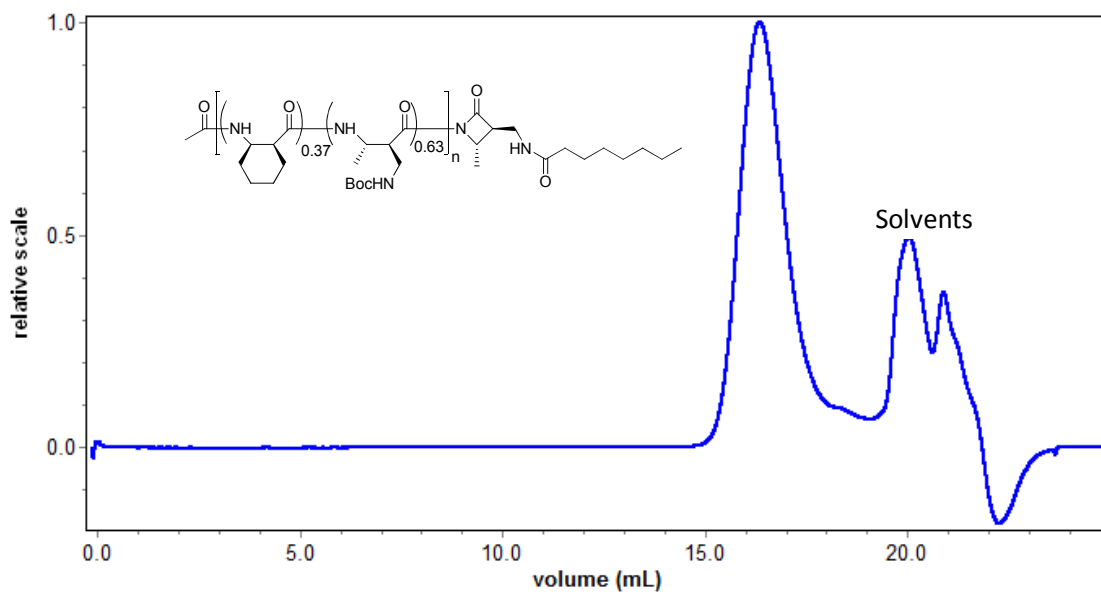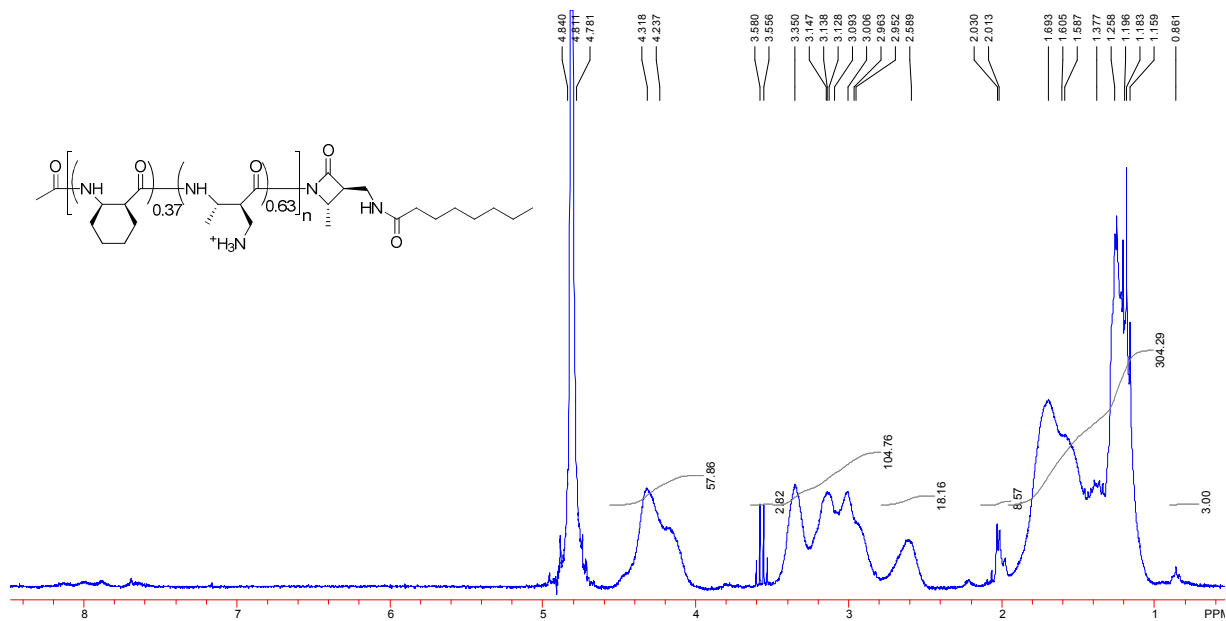

$^1\text{H}$  NMR of **1E** in  $\text{D}_2\text{O}$  at 10 mg/mL.

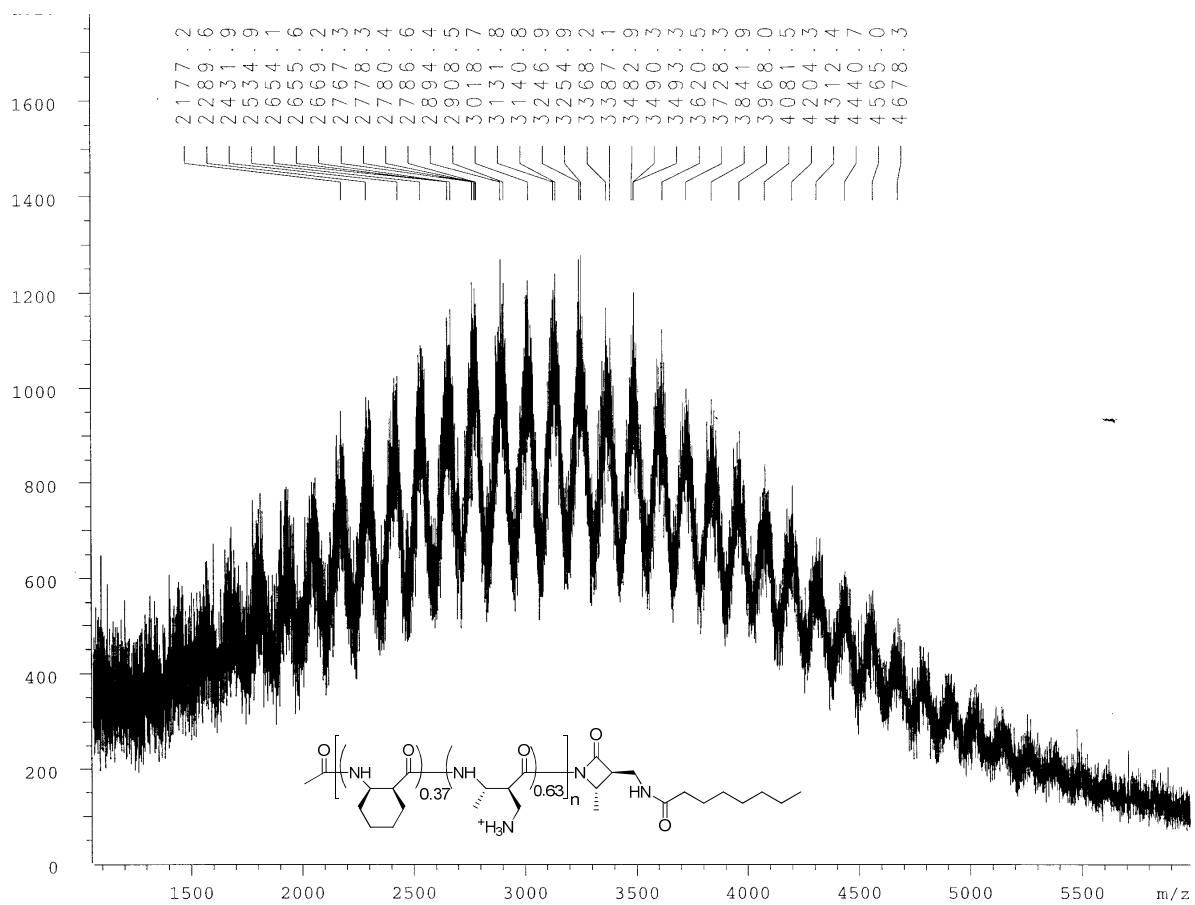

MALDI-TOF spectrum of **1E**.

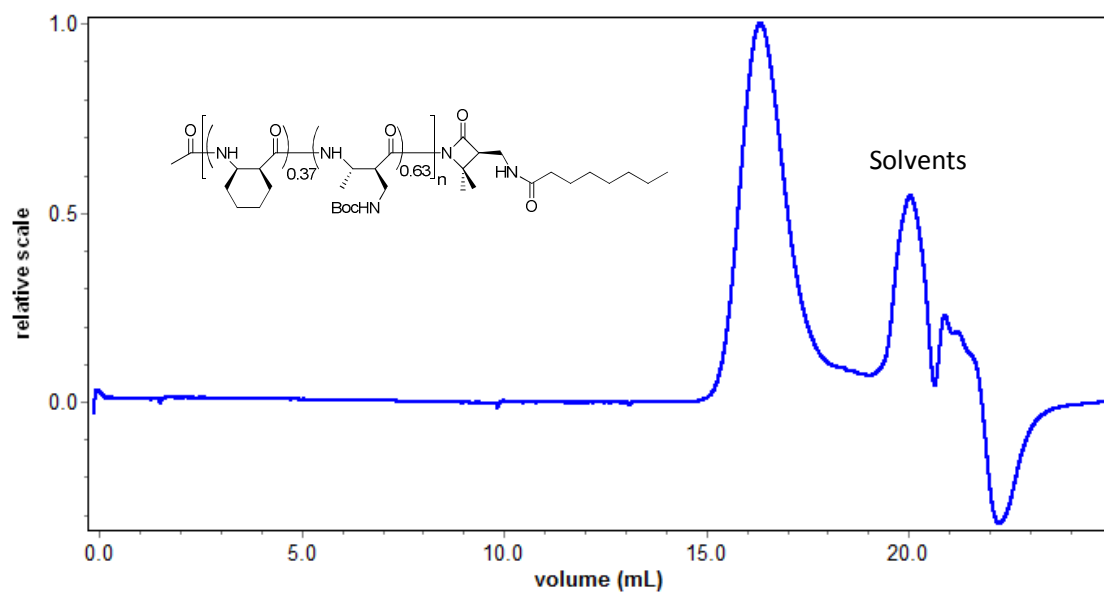

GPC trace (RI detection) of Boc-protected **1D-a** in THF.  $M_n = 5676$ , PDI = 1.06,  $dn/dc = 0.1$ .

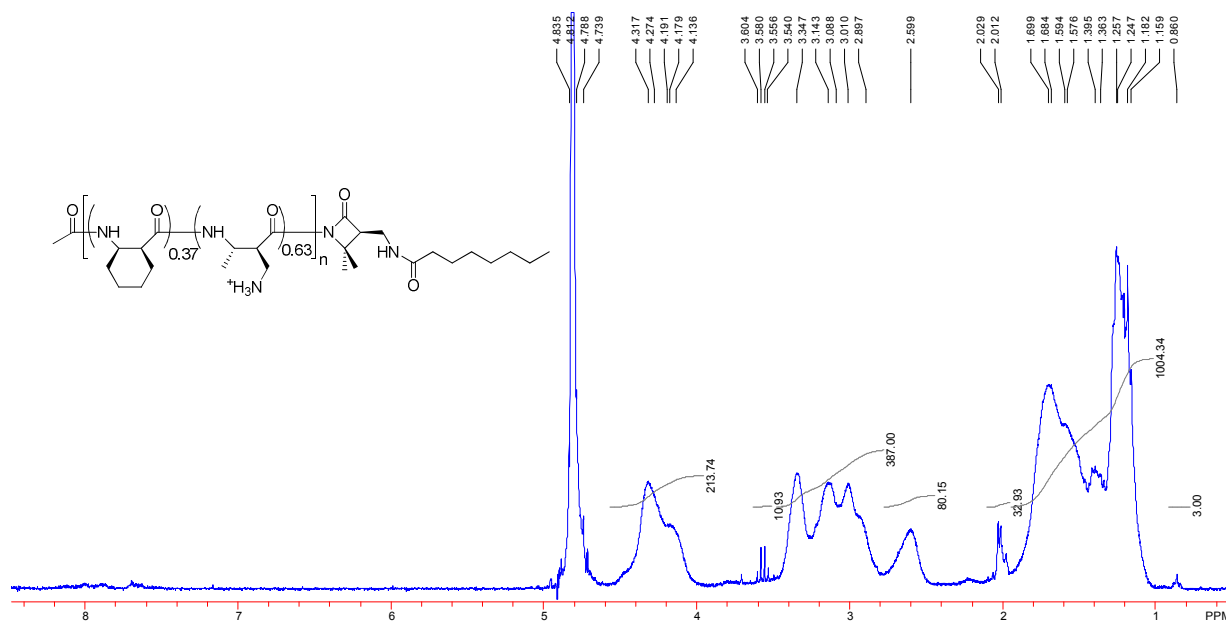

$^1\text{H}$  NMR of **1D-a** in  $\text{D}_2\text{O}$  at 10 mg/mL.



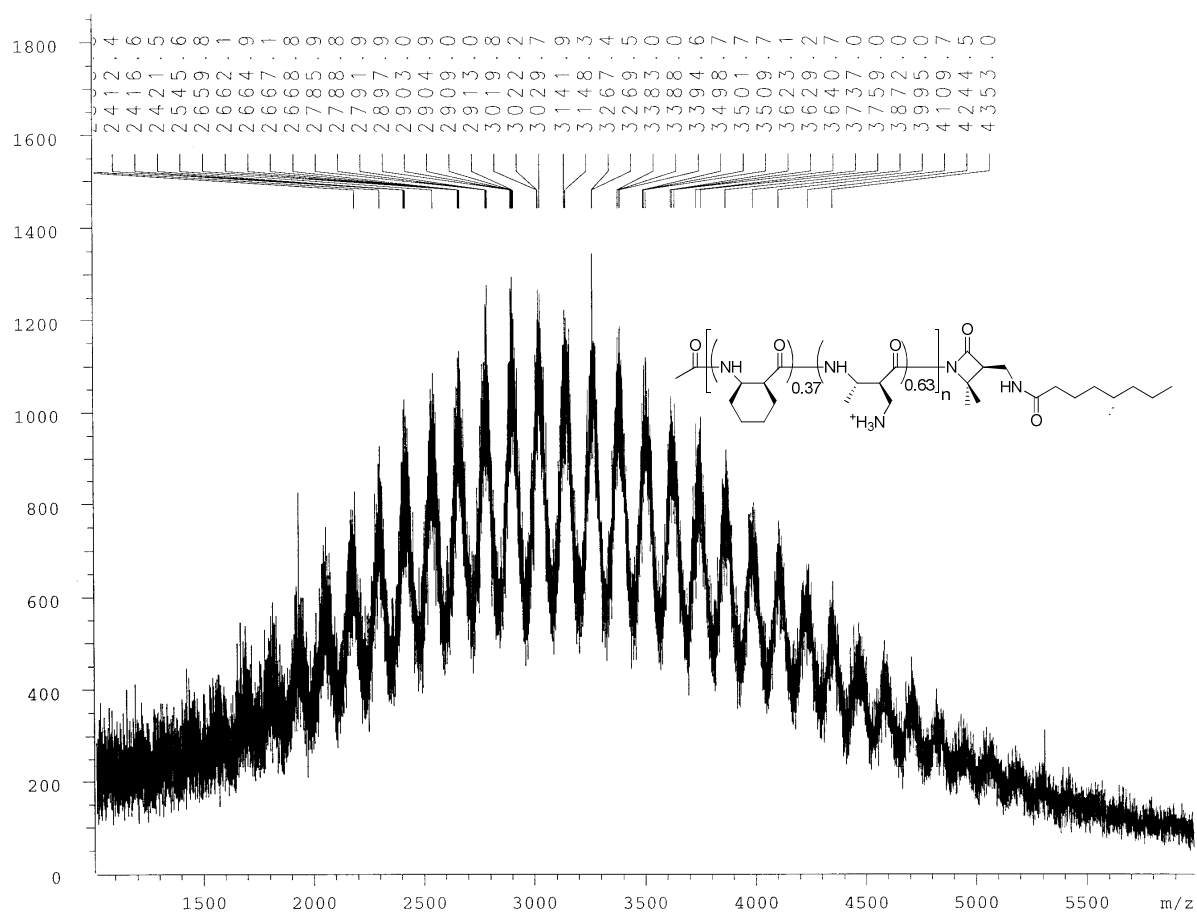

MALDI-TOF spectrum of **1D-a**.

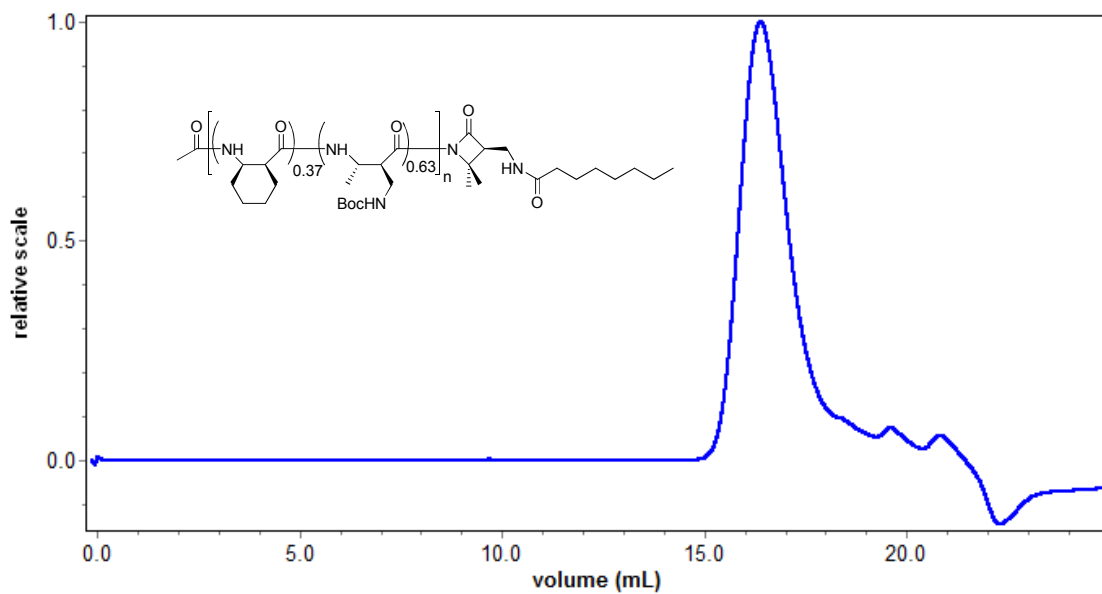

GPC trace (RI detection) of Boc-protected **1D-b** in THF.  $M_n = 5544$ , PDI = 1.09,  $dn/dc = 0.1$ .

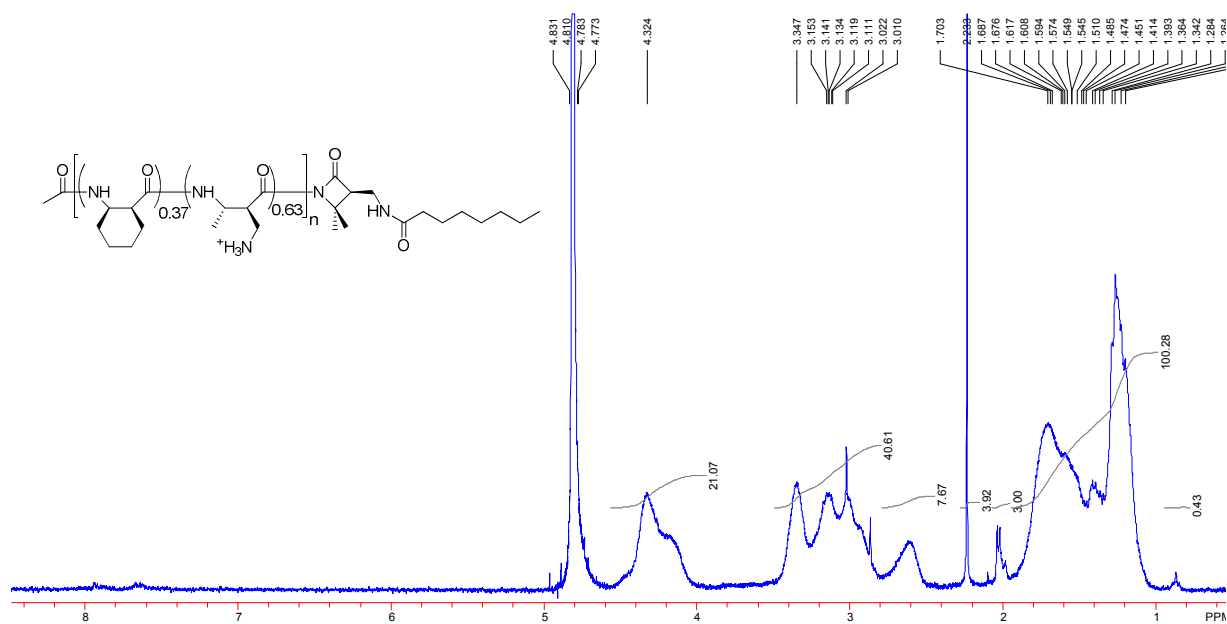

$^1\text{H}$  NMR of **1D-b** in  $\text{D}_2\text{O}$  at 10 mg/mL.

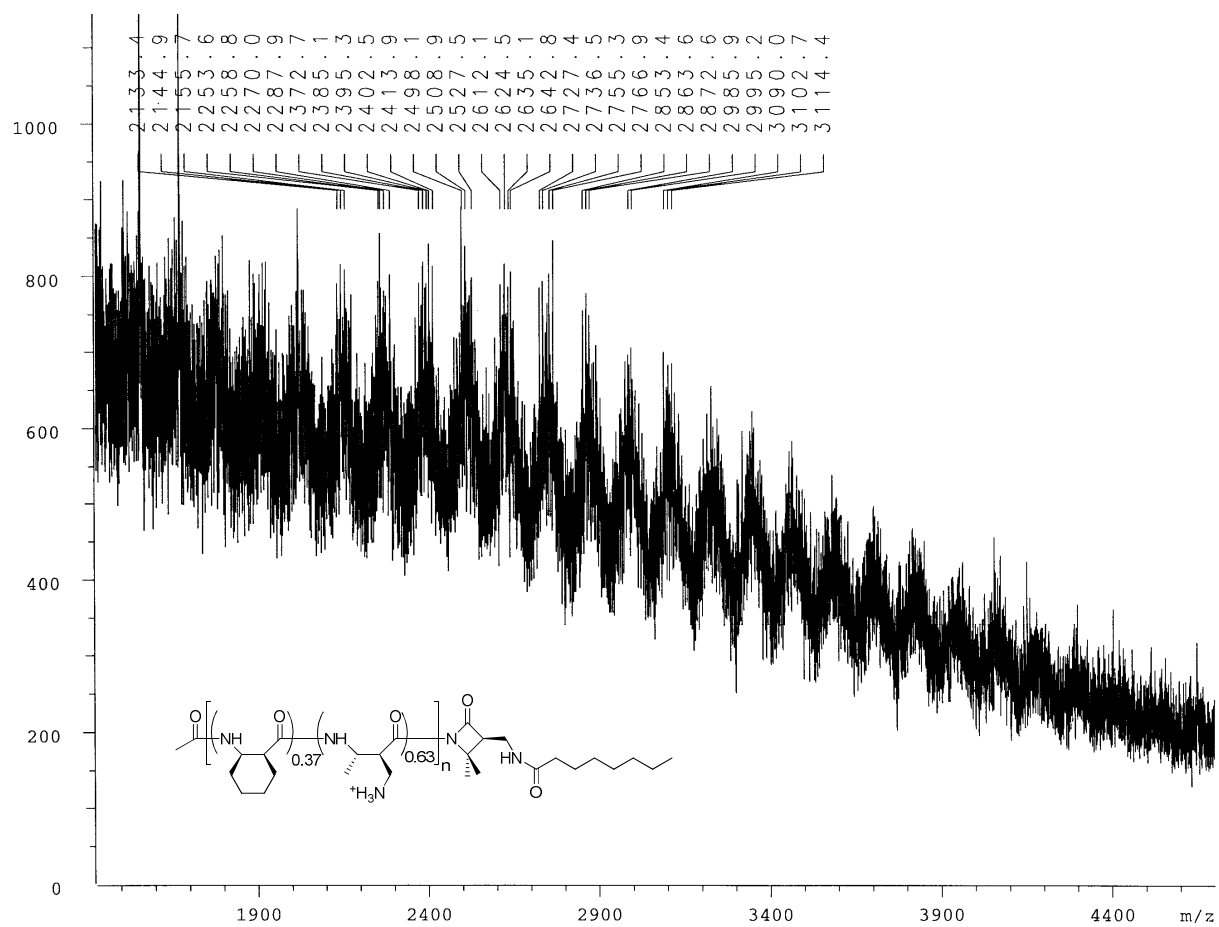

MALDI-TOF spectrum of **1D-b**.

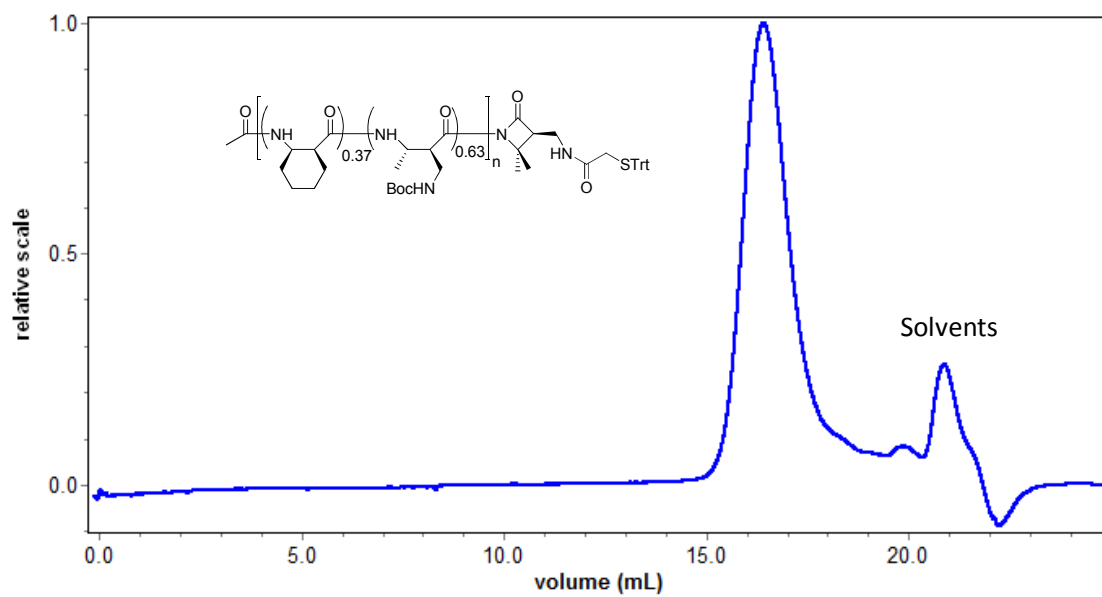

GPC trace (RI detection) of Boc-protected **1F** (with trityl-protected thiol) in THF.  $M_n = 5449$ , PDI = 1.11,  $dn/dc = 0.1$ .

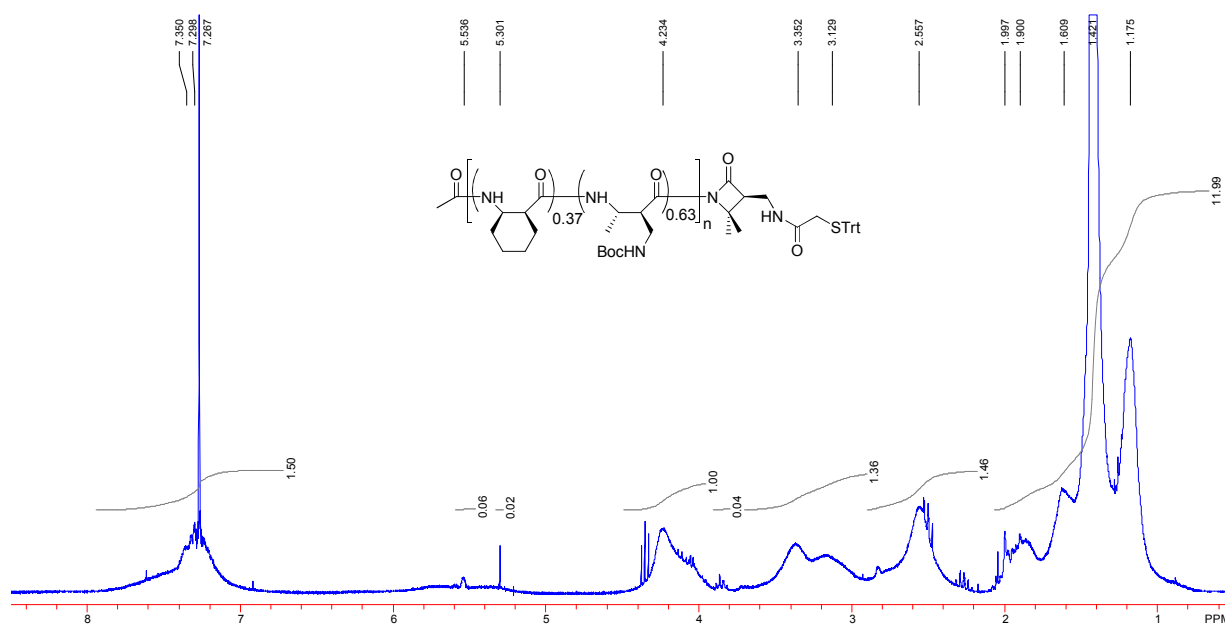

$^1\text{H}$  NMR of Boc-protected **1F** (with trityl-protected thiol) in  $\text{CDCl}_3$  at 10 mg/mL.

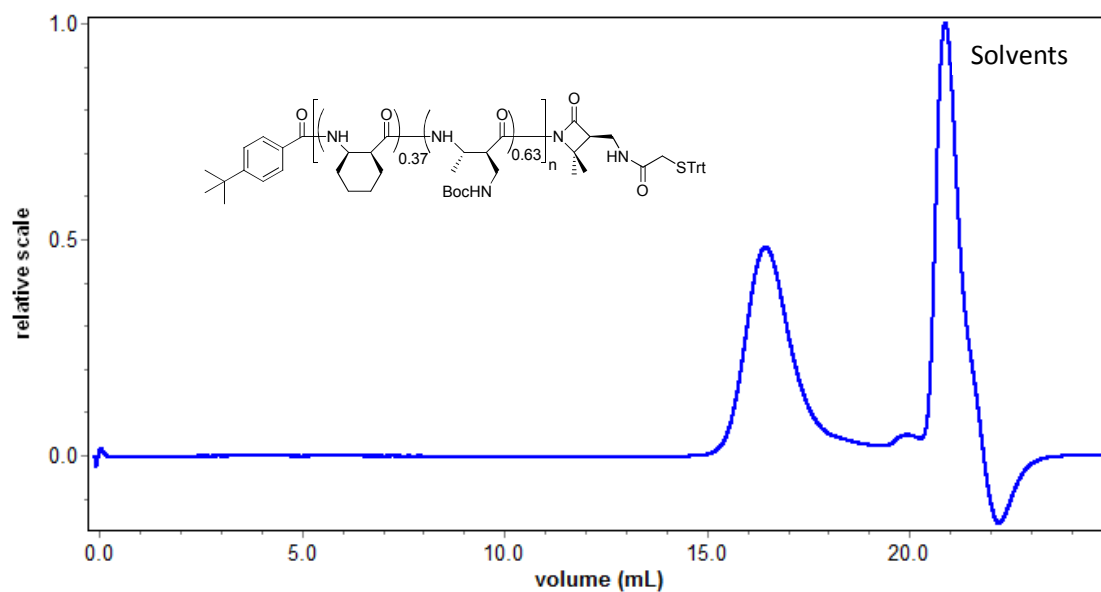

GPC trace (RI detection) of Boc-protected **2F** (with trityl-protected thiol) in THF.  $M_n = 4917$ , PDI = 1.12,  $dn/dc = 0.1$ .

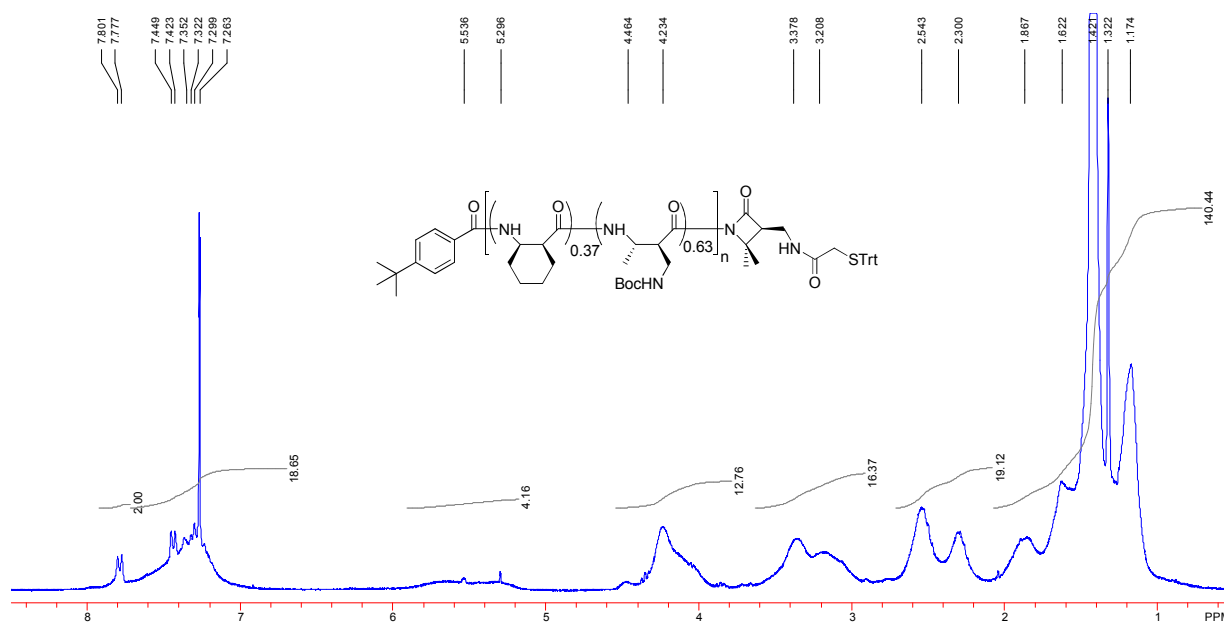

$^1\text{H}$  NMR of Boc-protected **2F** (with trityl-protected thiol) in  $\text{CDCl}_3$  at 10 mg/mL.

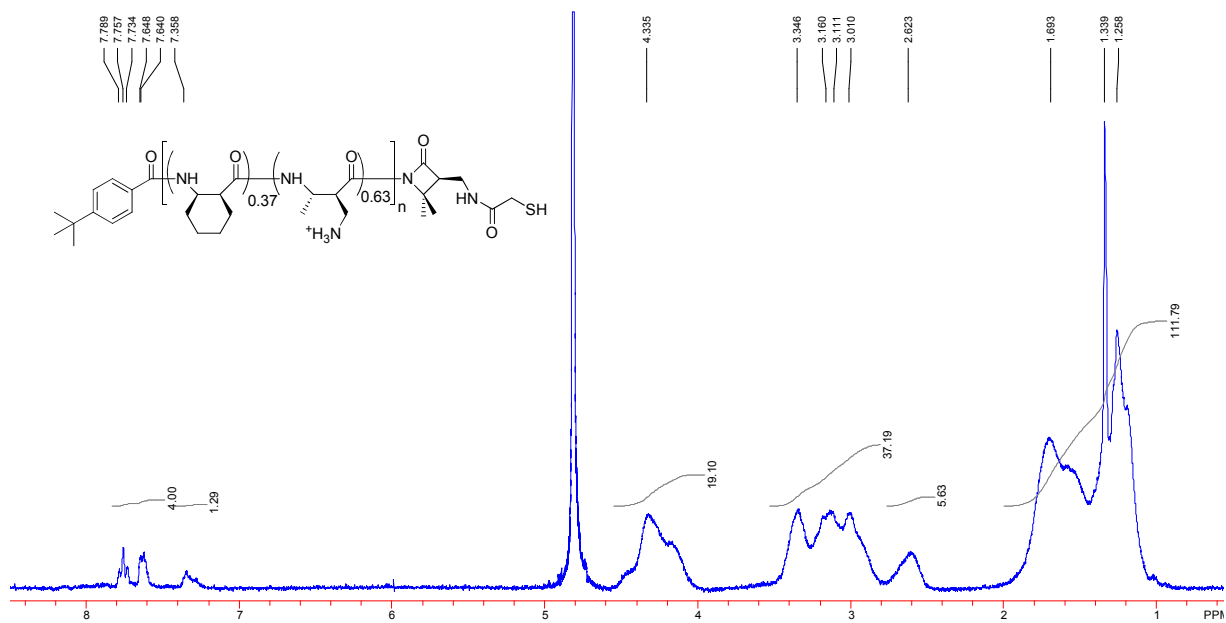

$^1\text{H}$  NMR of **2F**  $\text{D}_2\text{O}$  at 10 mg/mL.

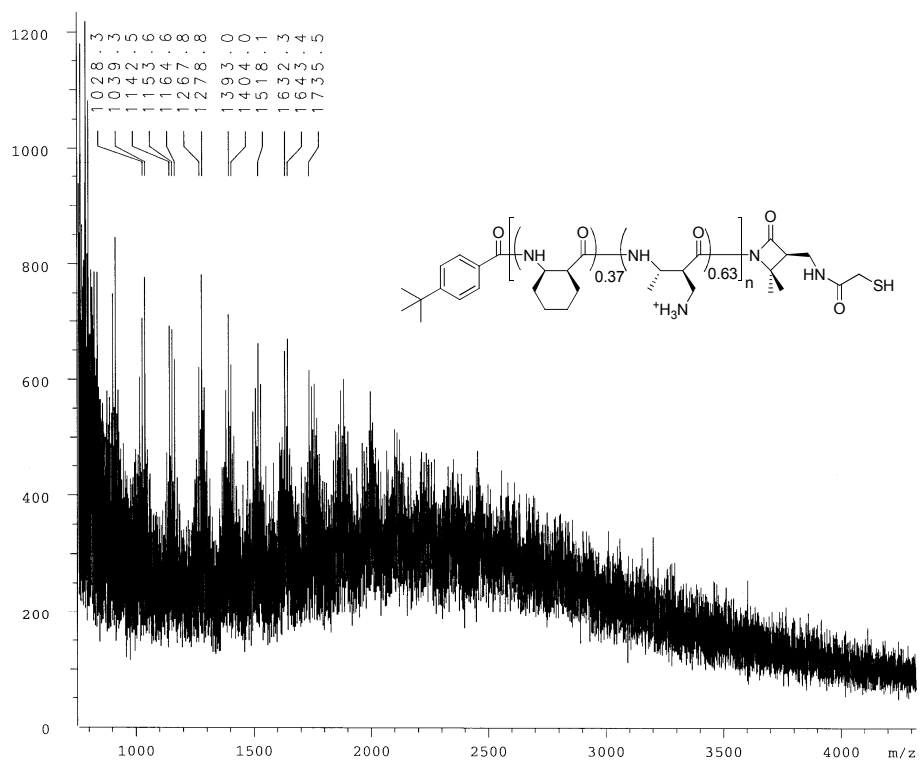

MALDI-TOF spectrum of **2F**.

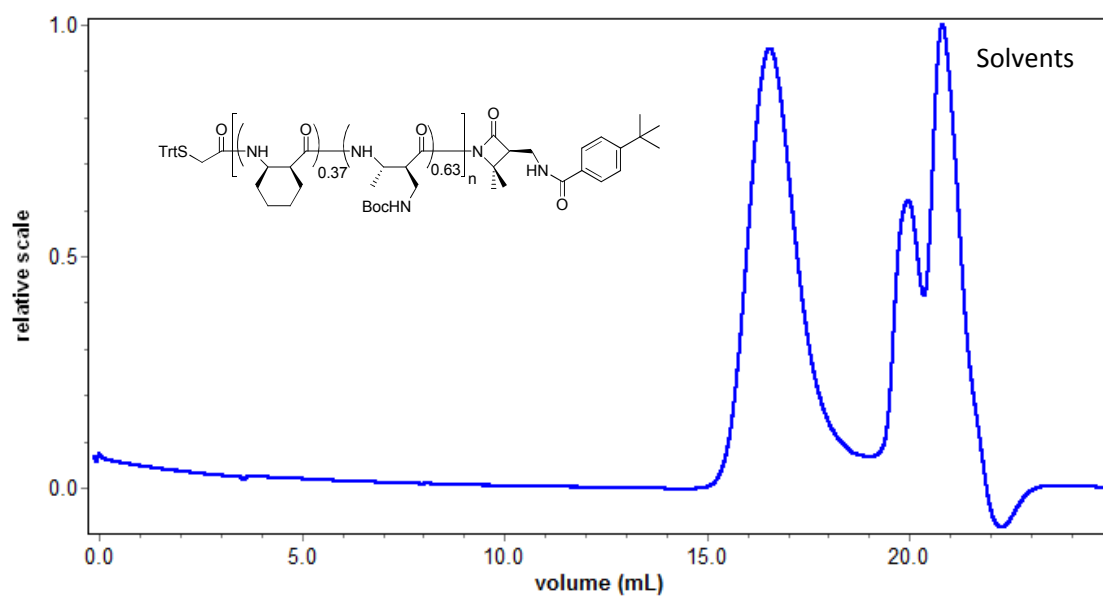

GPC trace (RI detection) of Boc-protected **4C** (with trityl-protected thiol) in THF.  $M_n = 4573$ , PDI = 1.13,  $dn/dc = 0.1$ .

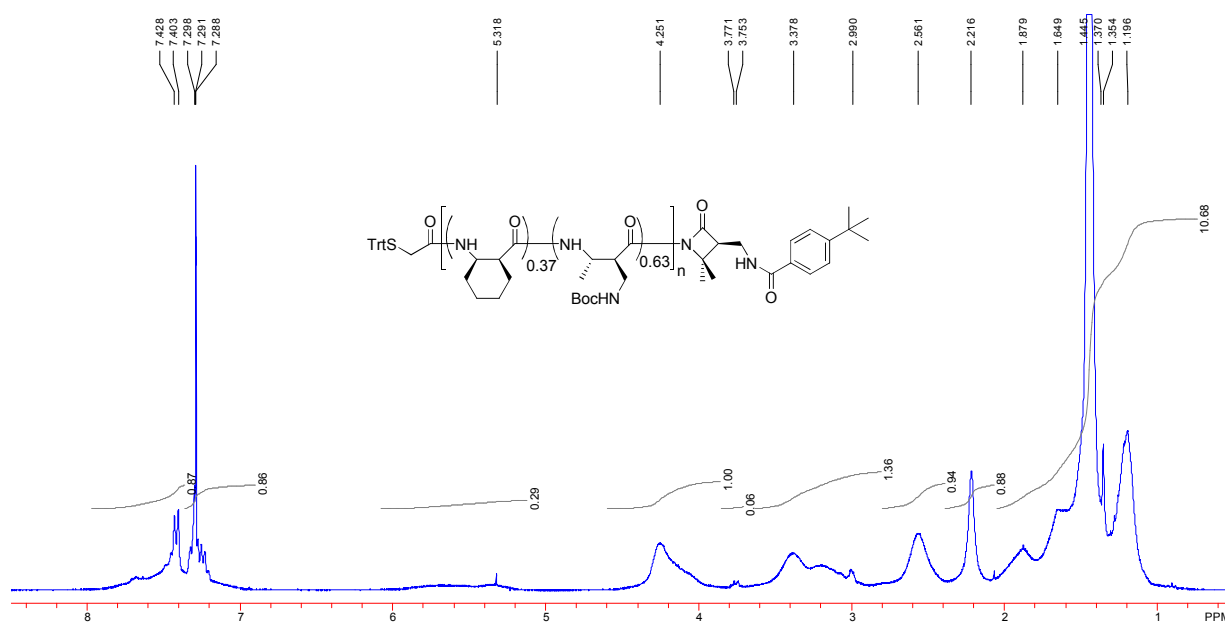

$^1\text{H}$  NMR of Boc-protected **4C** (with trityl-protected thiol) in  $\text{CDCl}_3$  at 10 mg/mL.

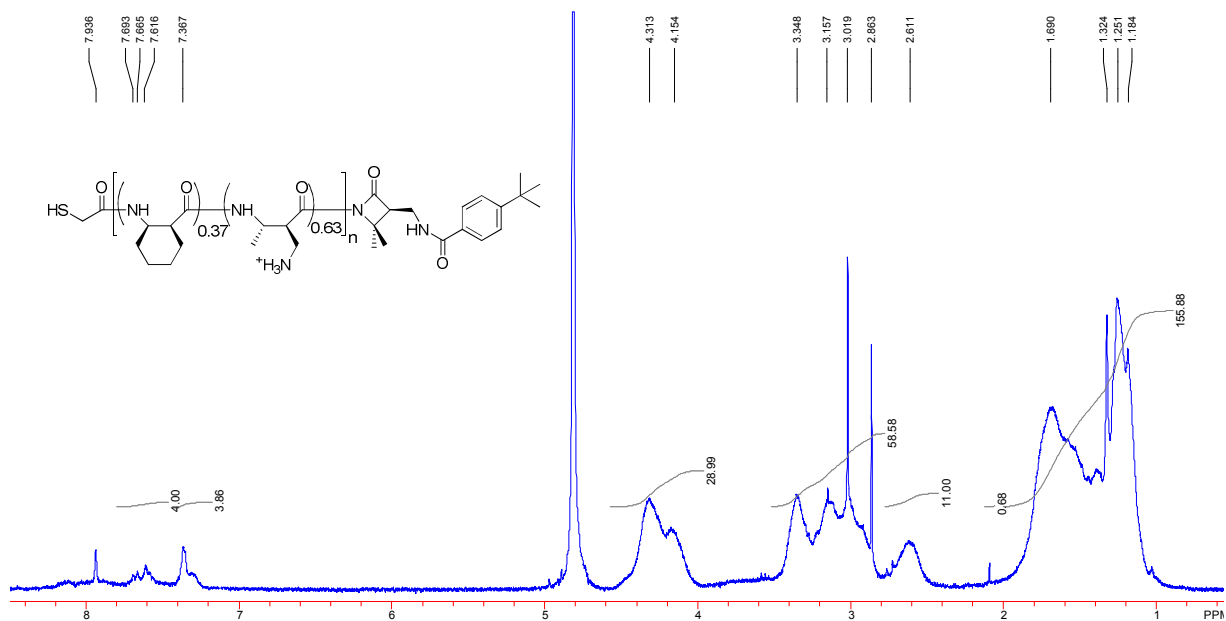

$^1\text{H}$  NMR of 4C  $\text{D}_2\text{O}$  at 10 mg/mL.

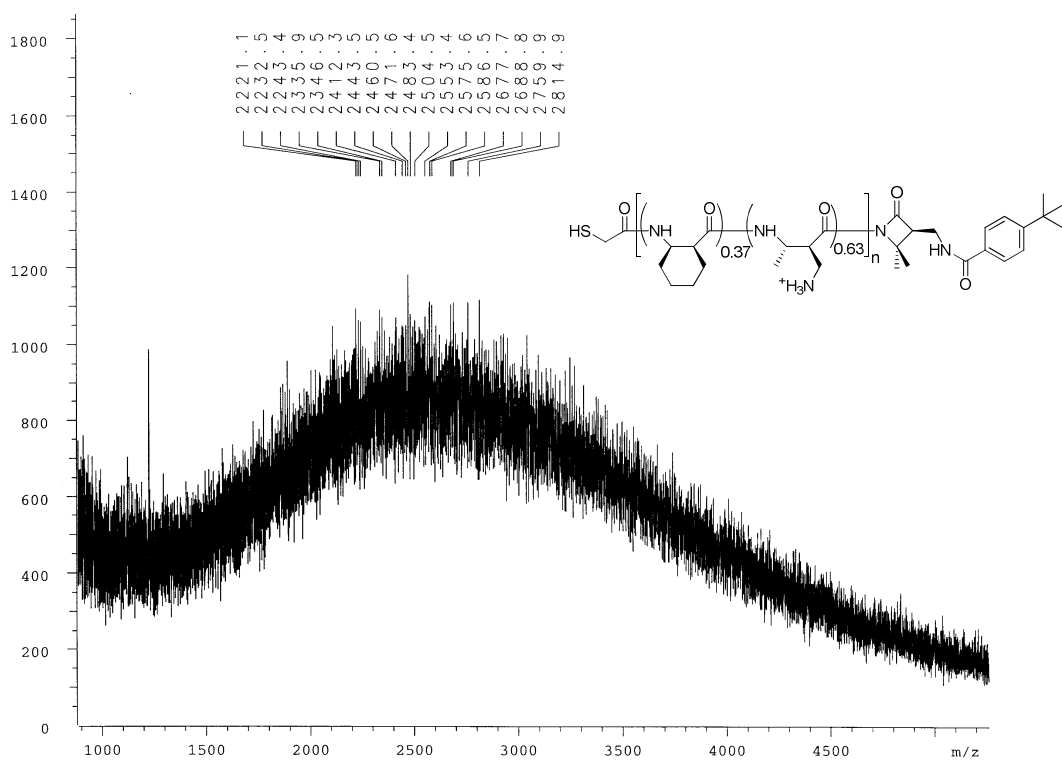

MALDI-TOF spectrum of 4C.



### 3 Antibacterial and hemolytic assays

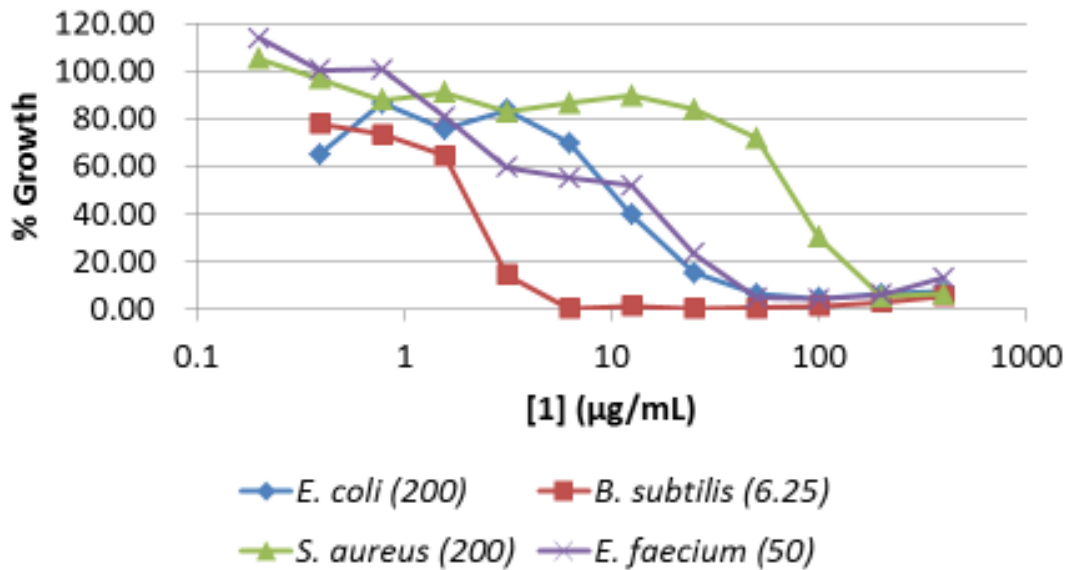

Dose-response curves of antibacterial activity of polymer 1. Numbers in the parentheses are the MIC values (µg/mL) deduced from the corresponding curves. The lines simply connect the data points.

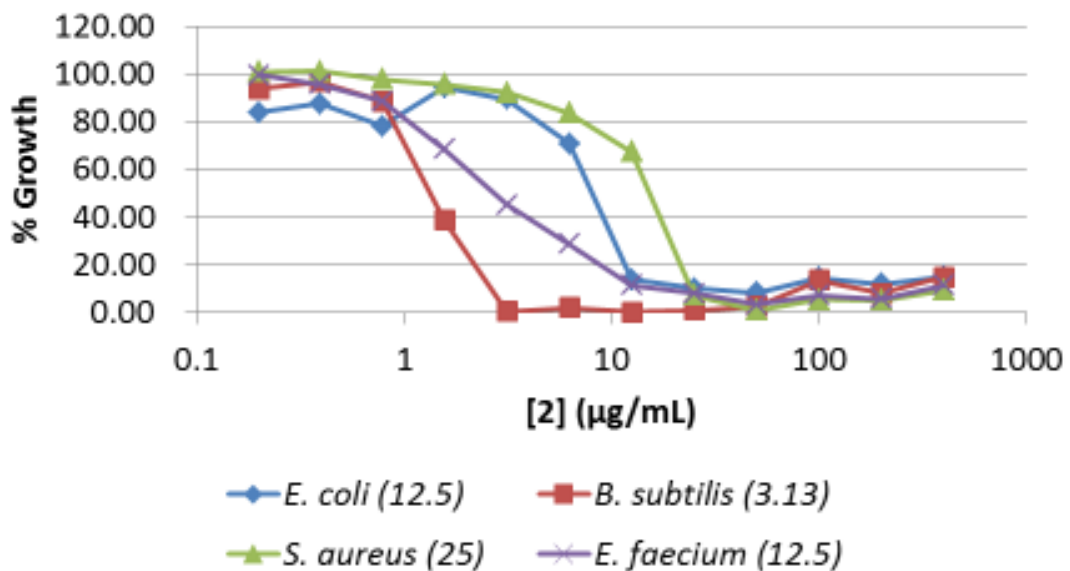

Dose-response curves of antibacterial activity of polymer 2. Numbers in the parentheses are the MIC values (µg/mL) deduced from the corresponding curves. The lines simply connect the data points.

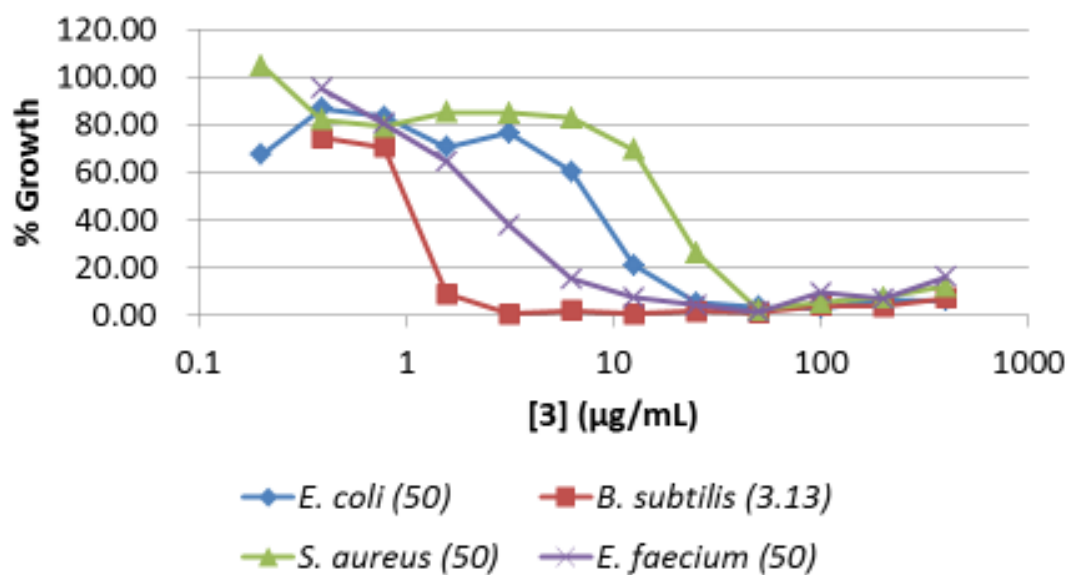

Dose-response curves of antibacterial activity of polymer **3**. Numbers in the parentheses are the MIC values ( $\mu\text{g/mL}$ ) deduced from the corresponding curves. The lines simply connect the data points.

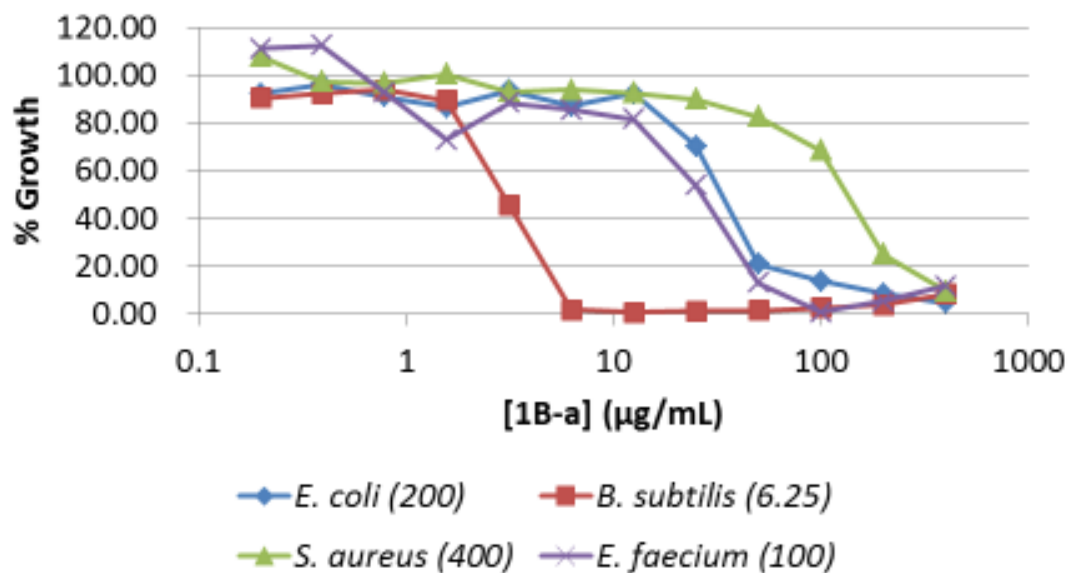

Dose-response curves of antibacterial activity of polymer **1B-a**. Numbers in the parentheses are the MIC values ( $\mu\text{g/mL}$ ) deduced from the corresponding curves. The lines simply connect the data points.

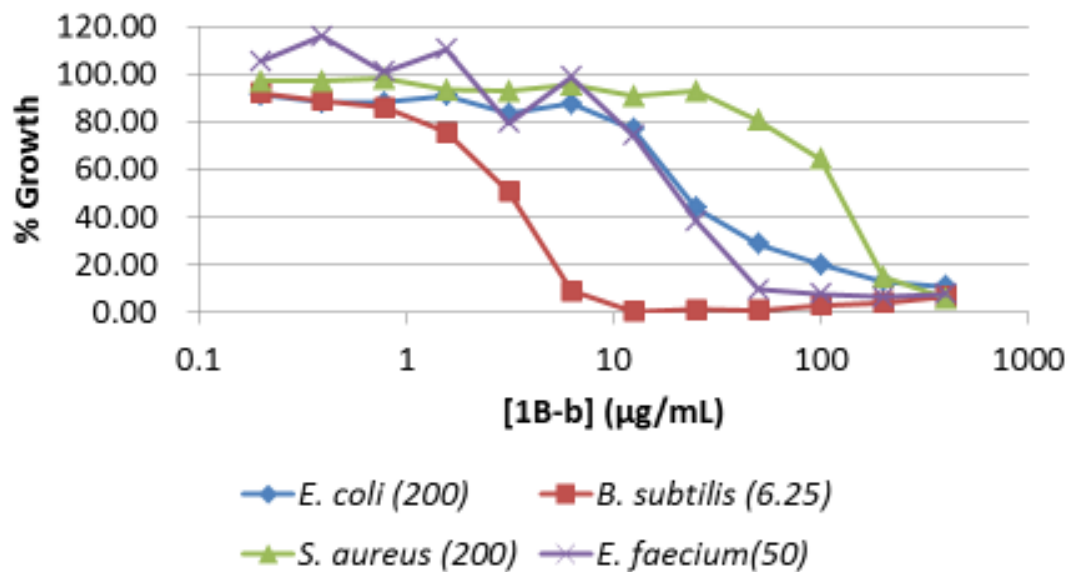

Dose-response curves of antibacterial activity of polymer **1B-b**. Numbers in the parentheses are the MIC values (µg/mL) deduced from the corresponding curves. The lines simply connect the data points.

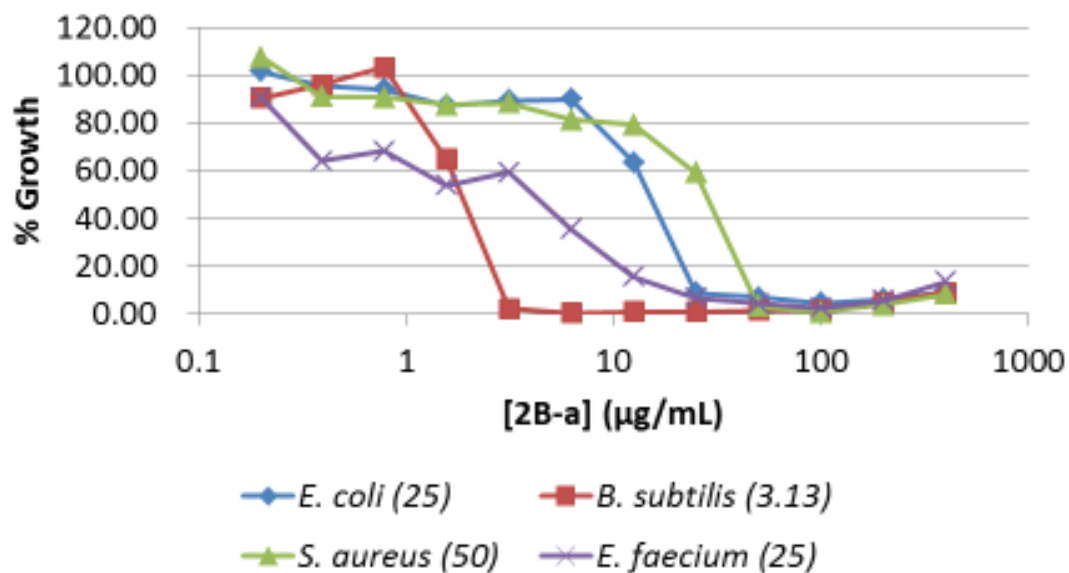

Dose-response curves of antibacterial activity of polymer **2B-a**. Numbers in the parentheses are the MIC values (µg/mL) deduced from the corresponding curves. The lines simply connect the data points.

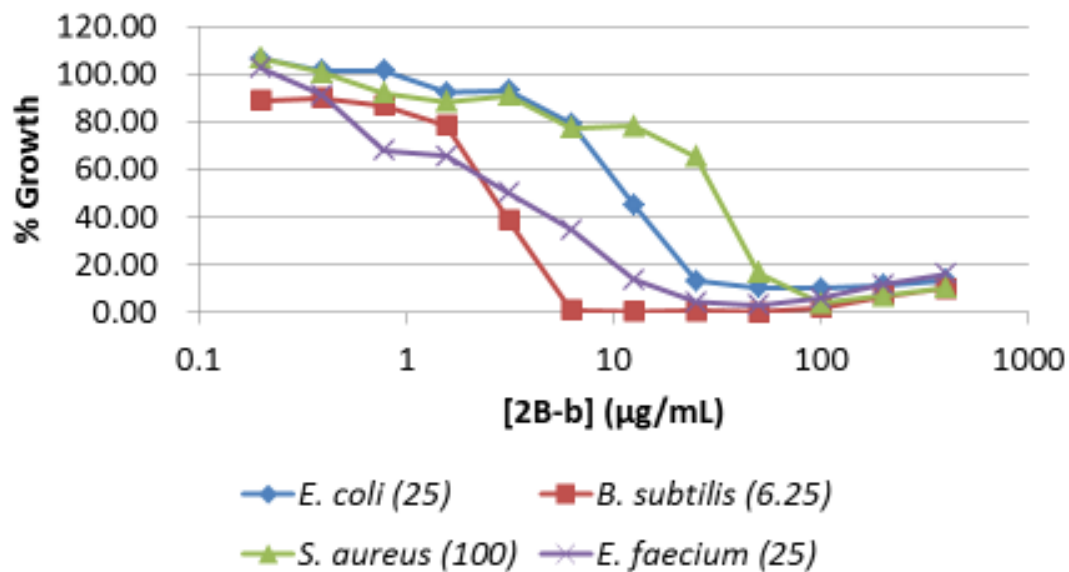

Dose-response curves of antibacterial activity of polymer **2B-b**. Numbers in the parentheses are the MIC values (µg/mL) deduced from the corresponding curves. The lines simply connect the data points.

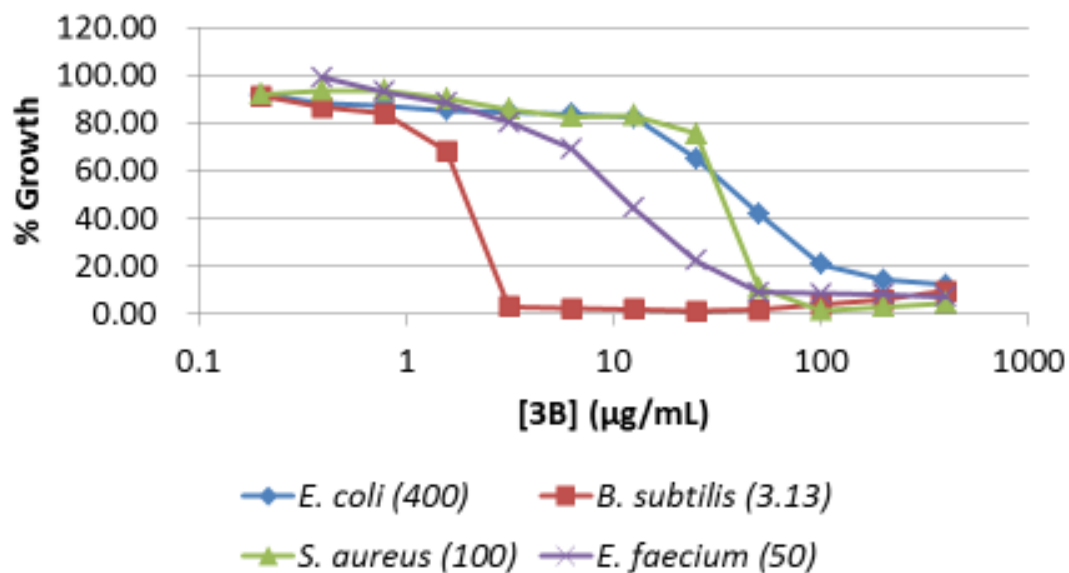

Dose-response curves of antibacterial activity of polymer **3B**. Numbers in the parentheses are the MIC values (µg/mL) deduced from the corresponding curves. The lines simply connect the data points.

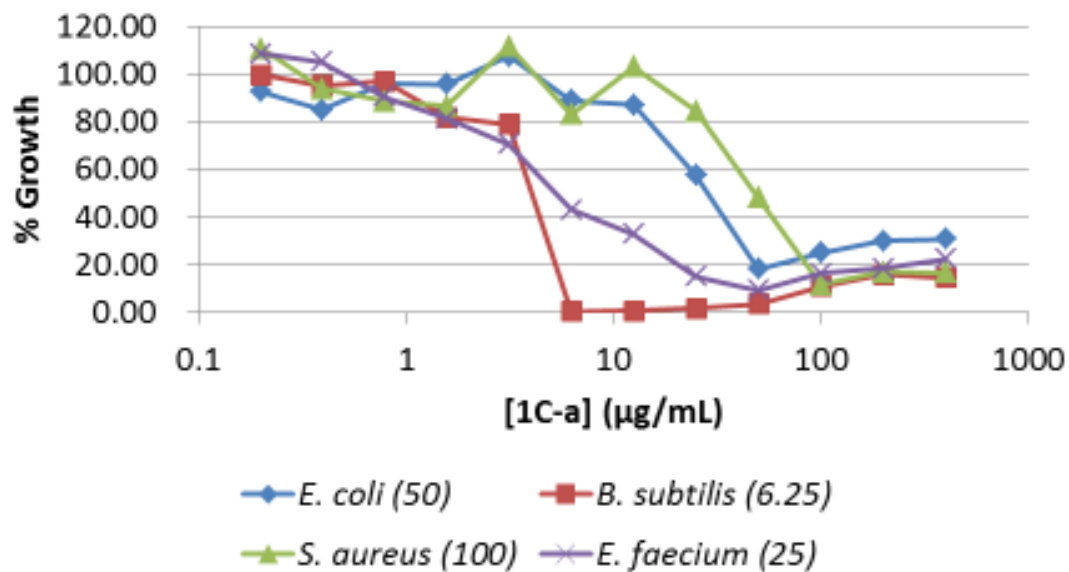

Dose-response curves of antibacterial activity of **1C-a**. Numbers in the parentheses are the MIC values ( $\mu\text{g/mL}$ ) deduced from the corresponding curves. The lines simply connect the data points.

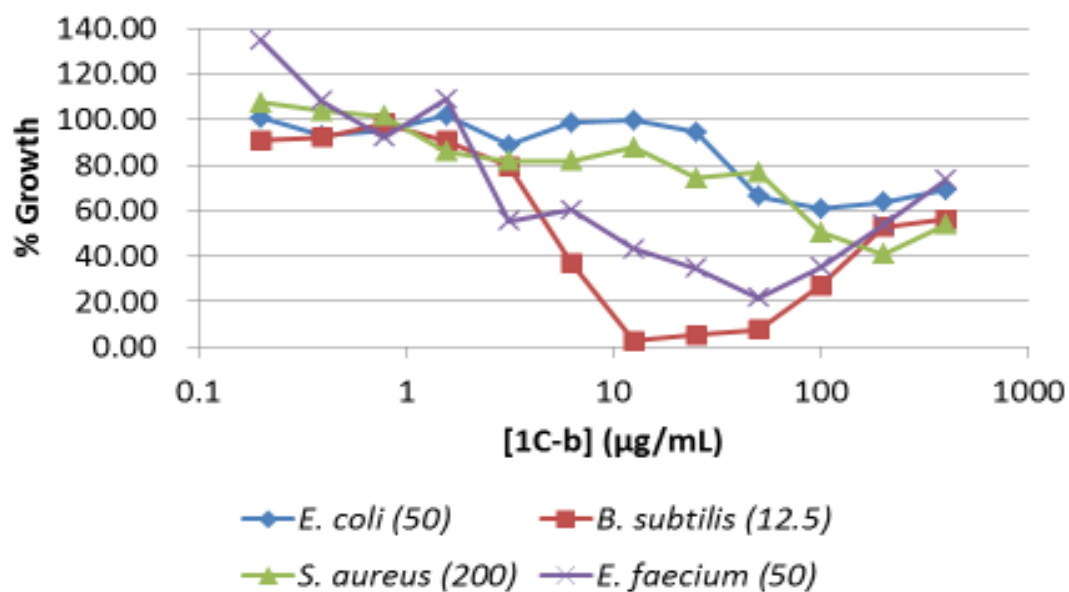

Dose-response curves of antibacterial activity of **1C-b**. Numbers in the parentheses are the MIC values ( $\mu\text{g/mL}$ ) deduced from the corresponding curves. The lines simply connect the data points. The polymer is not fully soluble in BHI  $> 100 \mu\text{g/mL}$ .

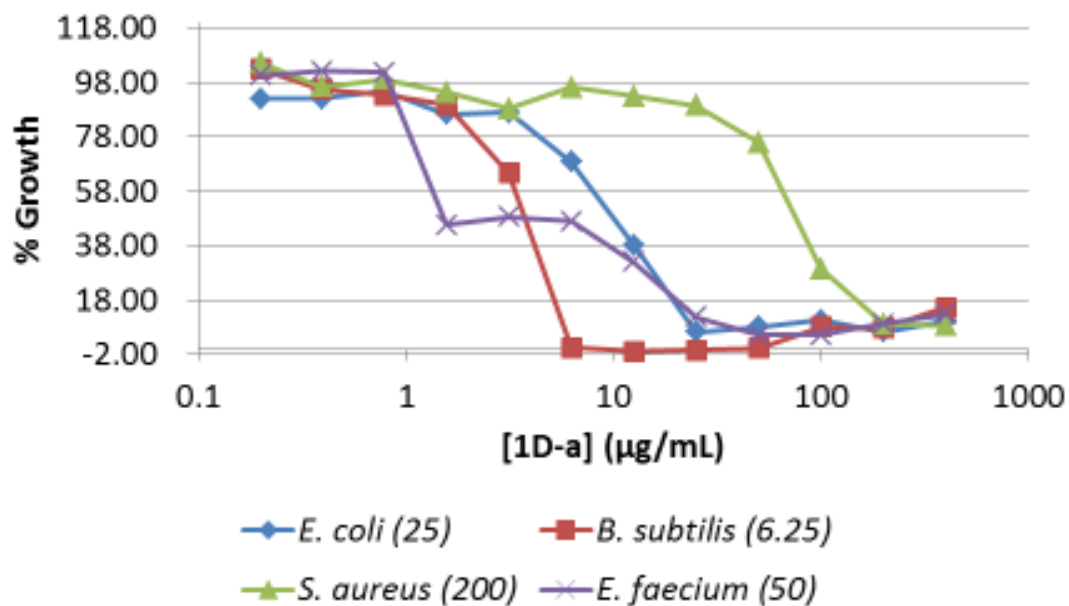

Dose-response curves of antibacterial activity of **1D-a**. Numbers in the parentheses are the MIC values (µg/mL) deduced from the corresponding curves. The lines simply connect the data points.

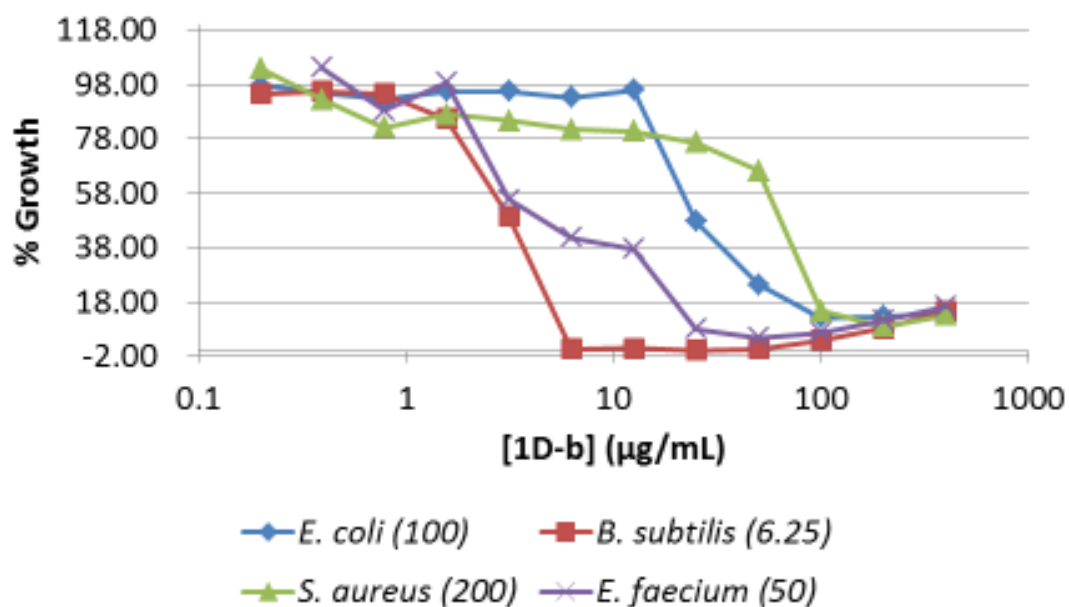

Dose-response curves of antibacterial activity of **1D-b**. Numbers in the parentheses are the MIC values (µg/mL) deduced from the corresponding curves. The lines simply connect the data points.

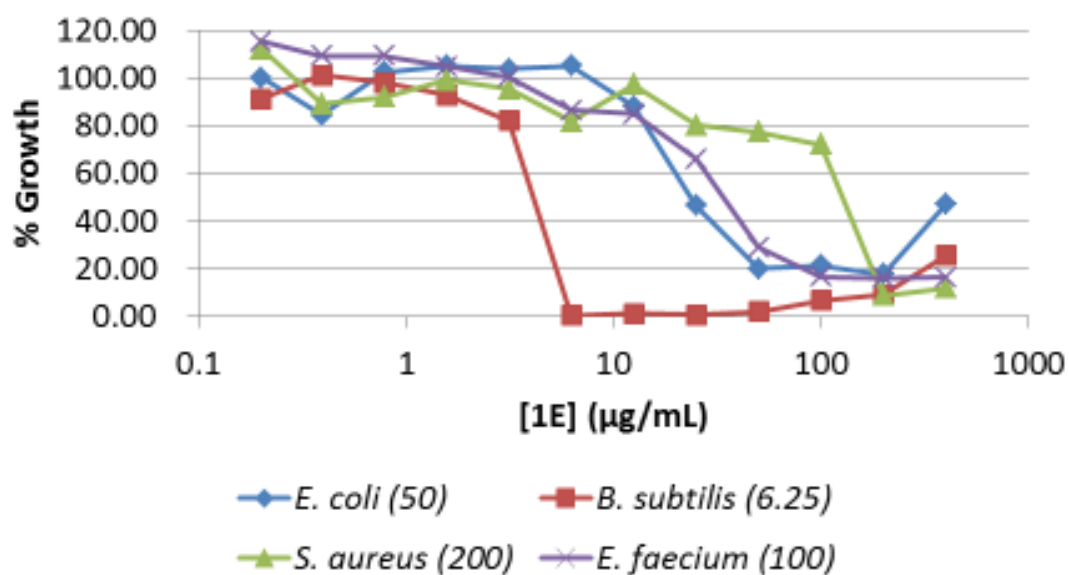

Dose-response curves of antibacterial activity of 1E. Numbers in the parentheses are the MIC values (µg/mL) deduced from the corresponding curves. The lines simply connect the data points. The polymer is not fully soluble in BHI > 200 µg/mL.

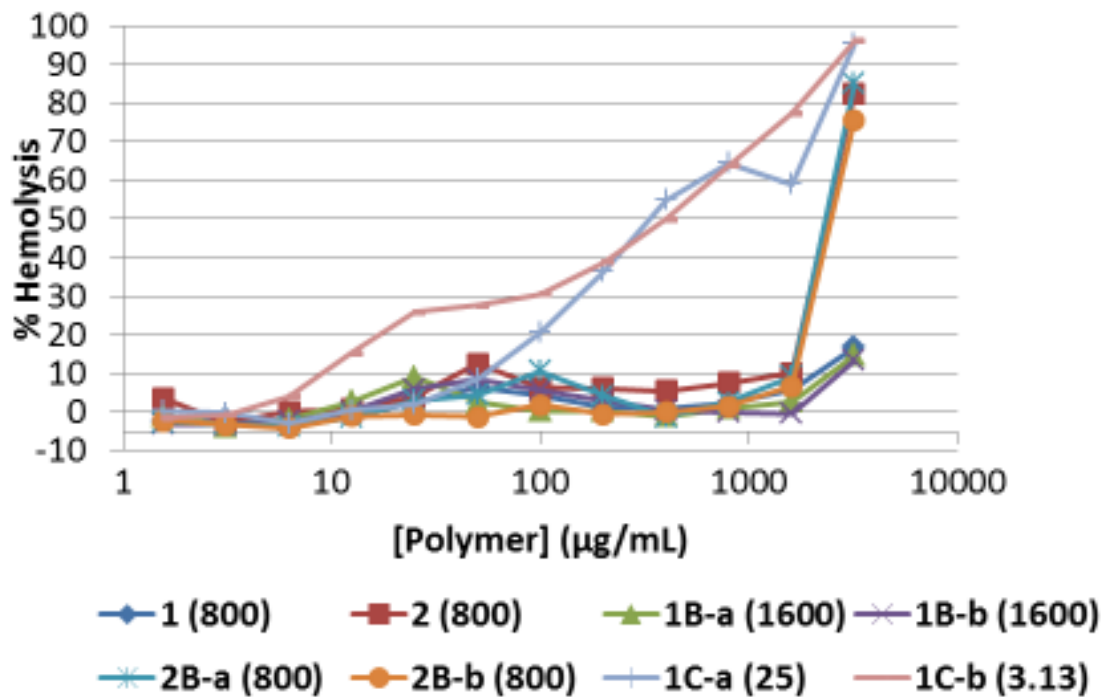

Dose-response curves of hemolytic activity. Numbers in the parentheses are the MHC values ( $\mu\text{g/mL}$ ) deduced from the corresponding curves. The lines simply connect the data points.



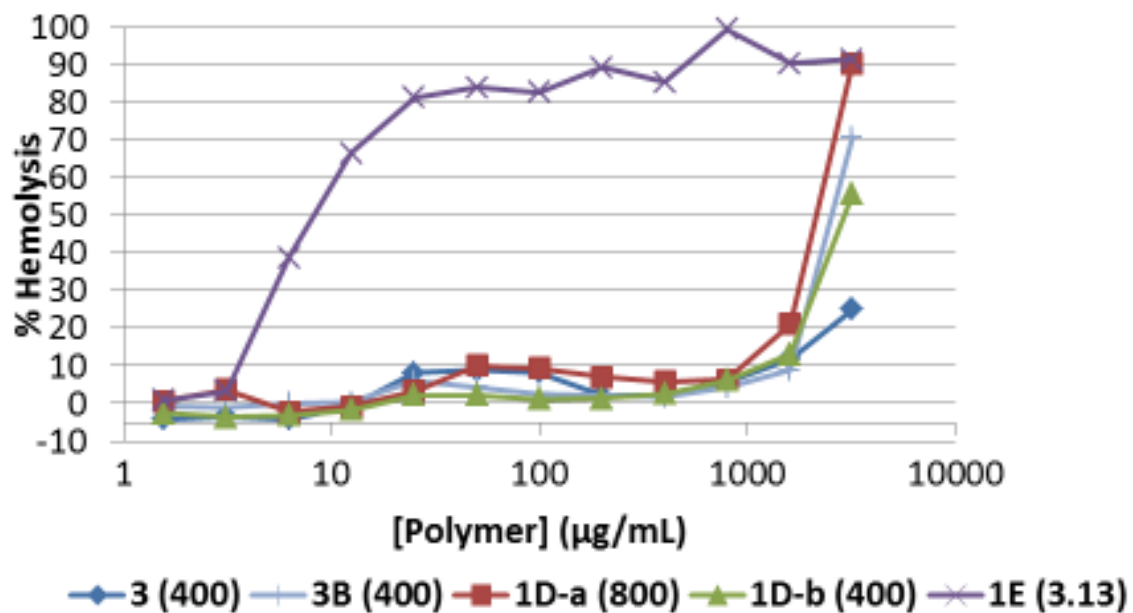

Dose-response curves of hemolytic activity. Numbers in the parentheses are the MHC (µg/mL) values deduced from the corresponding curves. The lines simply connect the data points.

3 CAC measurements in Tris-buffered saline

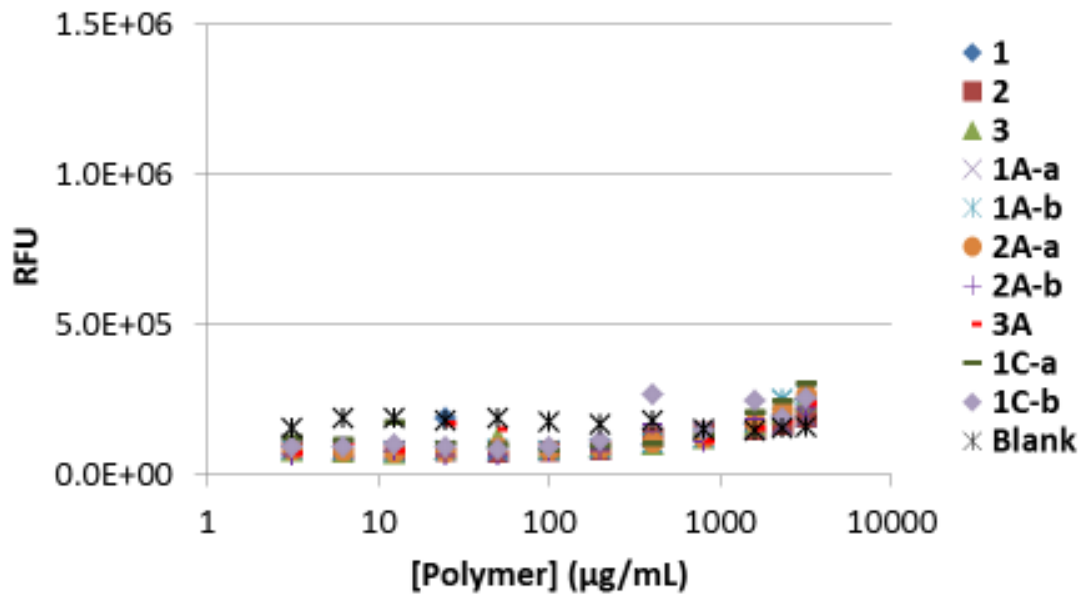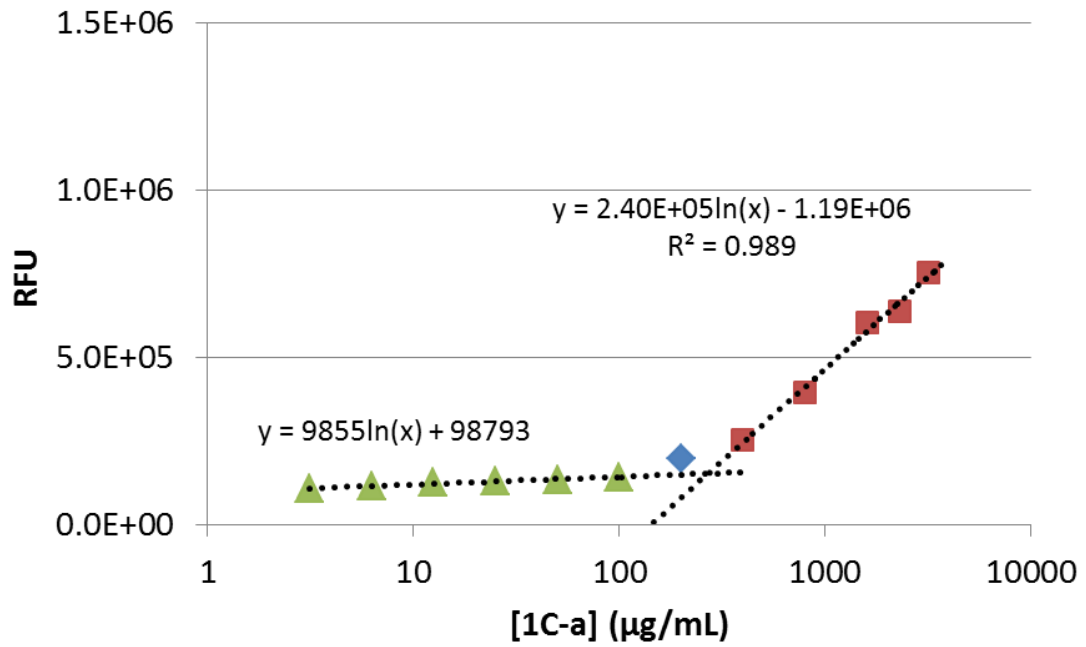

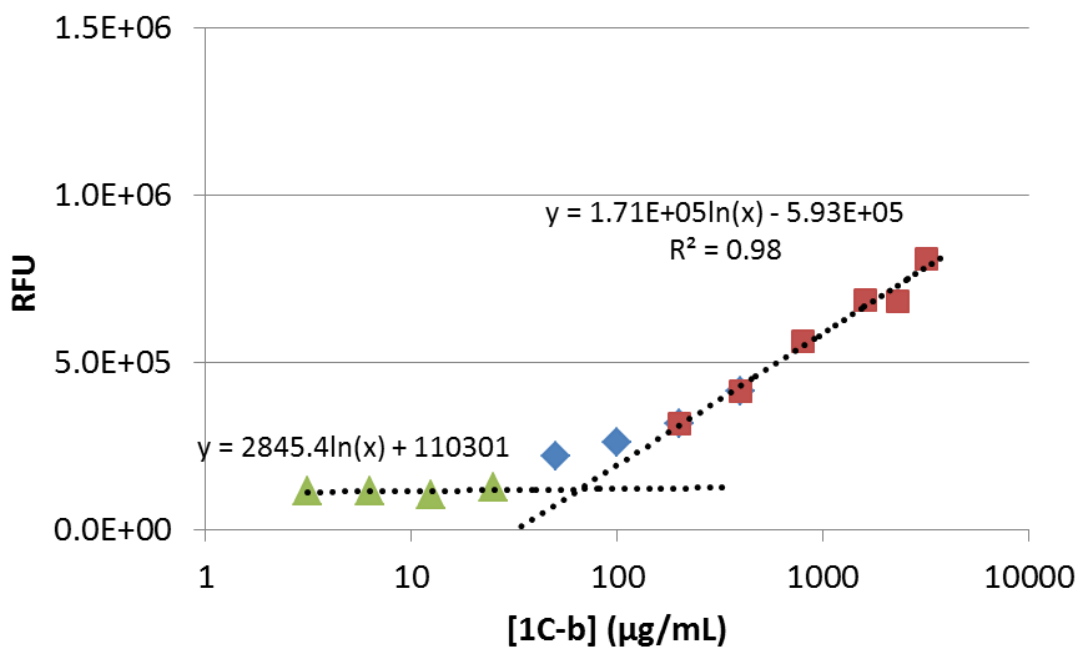

DPH fluorescence plot for **1C-b**. CAC = 70 µg/mL.

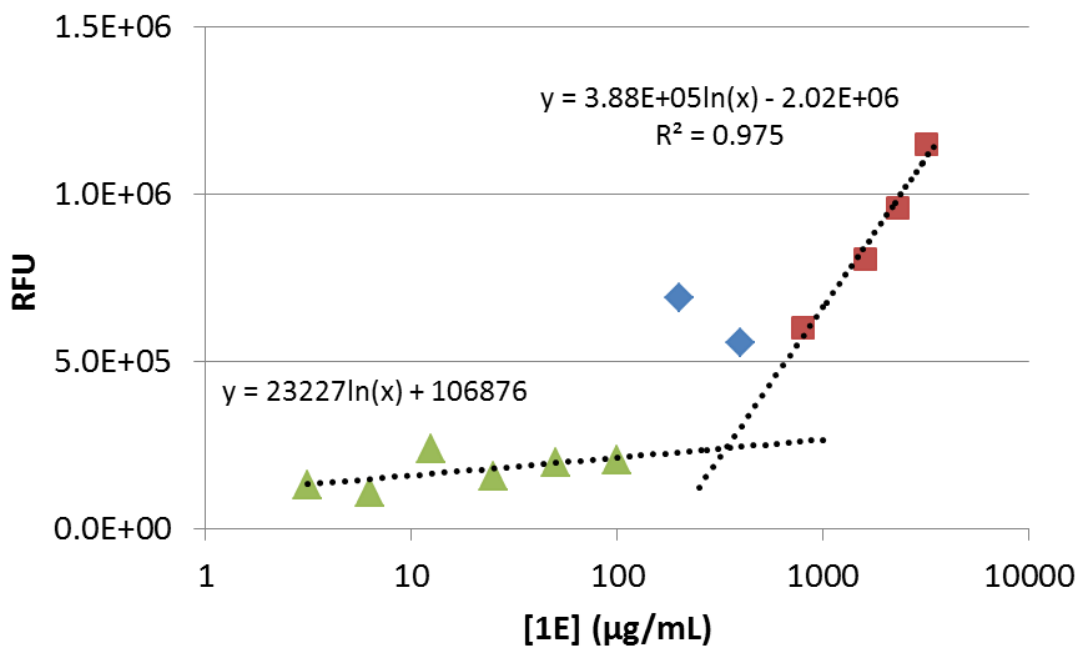

DPH fluorescence plot for **1E**. CAC = 360 µg/mL.

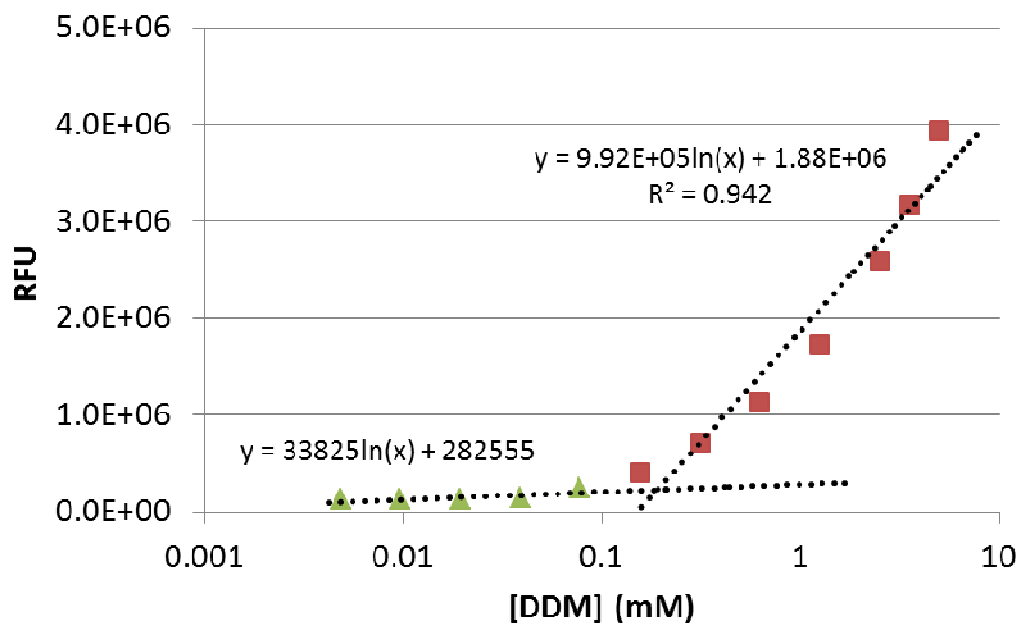

DPH fluorescence plot for **DDM**. CAC = 0.19 mM (lit. 0.17mM).
